# Supplementary material for: Investigating Gut Microbiota with Gamma- Aminobutyric Acid Production Potential in Methamphetamine Addiction Recovery
Source: Research Square preprint supplement (doi:10.21203/rs.3.rs-7033630/v1), 2025-08-27
Supplement: Supplementary file 1 [file b69f56547935e5e5b93cf1c7.xlsx]

## Sheet: Content
Supplementary files
No.	Tab label	Description
1	Metadata (MWvsHC)	Metadata of MW and HC for MicrobiomeAnalyst2
2	OTU (MWvsHC)	OTU/ASV table of MW and HC for MicrobiomeAnalyst2
3	Taxonomy (MWvsHC)	Taxonomy of MW and HC for MicrobiomeAnalyst2
4	Taxa abundance (MWvsHC)	Taxa Abundance of MW and HC for MicrobiomeAnalyst2
5	Alpha diversity (MWvsHC)	Alpha diversity of Chao, Observed and Shannon for MW and HC generated from MicrobiomeAnalyst2
6	Beta diversity (MWvsHC)	Beta diversity of Bray-Curtis for MW and HC generated from MicrobiomeAnalyst2
7	LEfSe (MWvsHC)	Linear Discriminant Analysis Effect Size (LEfSe) for MW and HC generated from MicrobiomeAnalyst2
8	Metadata (ChronicEarly)	Metadata of Chronic and Early for MicrobiomeAnalyst2
9	OTU (ChronicEarly)	OTU/ASV table of MW and HC for MicrobiomeAnalyst2
10	Taxonomy (ChronicEarly)	Taxonomy of MW and HC for MicrobiomeAnalyst2
11	Taxa abundance (ChronicEarly)	Taxa Abundance of MW and HC for MicrobiomeAnalyst2
12	Alpha diversity (ChronicEarly)	Alpha diversity of Chao, Observed and Shannon for MW and HC generated from MicrobiomeAnalyst2
13	Beta diversity (ChronicEarly)	Beta diversity of Bray-Curtis for MW and HC generated from MicrobiomeAnalyst2
14	STAMP-Metadata (MWvsHC)	Metadata of MW and HC for Statistical Analysis of Metagenomic Profiles (STAMP)
15	STAMP-Pathway_profile (MWvsHC)	Pathway Profiles of MW and HC for Statistical Analysis of Metagenomic Profiles (STAMP)
16	STAMP Active Features (MWvsHC)	Active features generated from Statistical Analysis of Metagenomic Profiles (STAMP)
17	STAMP GABA-Glutamate (MWvsHC)	Active features generated from Statistical Analysis of Metagenomic Profiles (STAMP) related to GABA-Glutamate pathways direct and indirectly
18	MaAsLin2 Metadata (MWvsHC)	Metadata of MW and HC for Microbiome Multivariable Association with Linear Models (MaAsLin2)
19	MaAsLin2 Feature data (MWvsHC)	Feature data of MW and HC for Microbiome Multivariable Association with Linear Models (MaAsLin2)
20	MaAsLin2 All Results (MWvsHC)	All results generated for MW and HC by Microbiome Multivariable Association with Linear Models (MaAsLin2)
21	MaAsLin2 Significant (MWvsHC)	Significant results generated for MW and HC by Microbiome Multivariable Association with Linear Models (MaAsLin2)
22	WGS W. confusa Report	Weissella confusa draft genome report

## Sheet: Metadata (MWvsHC)
Metadata of MW and HC for MicrobiomeAnalyst2
#NAME	Group
H33	Healthy_Control
H34	Healthy_Control
H35	Healthy_Control
H36	Healthy_Control
H37	Healthy_Control
H38	Healthy_Control
H39	Healthy_Control
H40	Healthy_Control
H41	Healthy_Control
H42	Healthy_Control
H43	Healthy_Control
H44	Healthy_Control
H45	Healthy_Control
H46	Healthy_Control
H47	Healthy_Control
H48	Healthy_Control
H49	Healthy_Control
H50	Healthy_Control
H51	Healthy_Control
H52	Healthy_Control
RAS10	Addicted
RAS11	Addicted
RAS12	Addicted
RAS14	Addicted
RAS15	Addicted
RAS16	Addicted
RAS17	Addicted
RAS18	Addicted
RAS19	Addicted
RAS1	Addicted
RAS20	Addicted
RAS21	Addicted
RAS23	Addicted
RAS25	Addicted
RAS26	Addicted
RAS27	Addicted
RAS28	Addicted
RAS29	Addicted
RAS2	Addicted
RAS30	Addicted
RAS31	Addicted
RAS32	Addicted
RAS33	Addicted
RAS35	Addicted
RAS36	Addicted
RAS3	Addicted
RAS4	Addicted
RAS5	Addicted
RAS6	Addicted
RAS7	Addicted
RAS8	Addicted
RAS9	Addicted
SS001	Healthy_Control
SS003	Healthy_Control
SS004	Healthy_Control
SS005	Healthy_Control
SS006	Healthy_Control
SS007	Healthy_Control
SS008	Healthy_Control
SS009	Healthy_Control
SS011	Healthy_Control
SS012	Healthy_Control
SS013	Healthy_Control
SS014	Healthy_Control
SS015	Healthy_Control
SS016	Healthy_Control
SS018	Healthy_Control
SS019	Healthy_Control
SS020	Healthy_Control
SS032	Healthy_Control
SS033	Healthy_Control
SS034	Healthy_Control
SS035	Healthy_Control
SS036	Healthy_Control
SS038	Healthy_Control
SS040	Healthy_Control
SS041	Healthy_Control
SS042	Healthy_Control
SS043	Healthy_Control
SS048	Healthy_Control
SS050	Healthy_Control
SS054	Healthy_Control
SS058	Healthy_Control
SS059	Healthy_Control
SS061	Healthy_Control
SS062	Healthy_Control
SS063	Healthy_Control
SS064	Healthy_Control
SS065	Healthy_Control
SS067	Healthy_Control
SS068	Healthy_Control
SS070	Healthy_Control
SS071	Healthy_Control
SS074	Healthy_Control
SS079	Healthy_Control
SS080	Healthy_Control

## Sheet: OTU (MWvsHC)
OTU/ASV table of MW and HC for MicrobiomeAnalyst2
#NAME	H33	H34	H35	H36	H37	H38	H39	H40	H41	H42	H43	H44	H45	H46	H47	H48	H49	H50	H51	H52	RAS1	RAS10	RAS11	RAS12	RAS14	RAS15	RAS16	RAS17	RAS18	RAS19	RAS2	RAS20	RAS21	RAS23	RAS25	RAS26	RAS27	RAS28	RAS29	RAS3	RAS30	RAS31	RAS32	RAS33	RAS35	RAS36	RAS4	RAS5	RAS6
ASV000001	451	288	217	2482	305	16760	364	478	41338	18463	304	13309	741	361	52892	18924	36217	1868	569	21022	753	267	279	299	240	390	9768	2143	9710	14879	253	1255	9007	457	6675	22749	309	1786	4360	6256	10718	4648	28580	793	10545	5579	3261	305	14540
ASV000002	16776	42760	12076	12098	22038	19041	18691	15286	6974	8370	13227	23467	1031	11081	8230	7961	11566	18865	44289	45488	10250	30412	14122	11337	24820	12565	11631	17062	10898	18536	657	20725	26859	25646	27430	12274	31061	6079	4774	28864	6490	40021	19029	8799	3853	6046	17169	3487	5781
ASV000003	23790	53	99	65	108	3285	156	59	8663	27	5624	449	71	26	102	31	63	19	41	31	760	20624	39714	12953	35370	893	342	10425	17528	20580	3438	9990	8030	715	8054	4141	167	750	1920	181	374	2075	40680	177	10880	6853	13102	398	86
ASV000004	1914	1119	887	8424	5710	2681	21324	2731	5652	6513	691	2164	199	4662	17149	9381	7417	4017	661	232	13750	2734	5957	392	1622	10277	5032	10217	4103	5364	15248	12225	15556	7997	21648	5953	3336	4642	656	5623	30847	16228	1926	9393	7004	2264	6830	21955	10108
ASV000005	4474	12453	4349	32418	2695	4006	1072	17386	3536	3621	7985	7826	597	2356	1628	9511	15670	12602	13234	1254	3409	5458	3443	1027	12916	5420	6778	4810	7579	19932	7946	5868	9147	9279	6881	1531	4234	2099	972	10792	1609	5273	4007	3925	2921	13112	849	2058	1960
ASV000006	579	880	833	506	11465	103	118	893	878	18416	476	107	6337	1315	156	57	928	9776	909	101	56842	1804	370	741	516	85893	970	1519	22225	634	55122	4504	186	558	6946	555	215	37743	395	2352	258	316	1632	1045	8021	35	14134	919	78757
ASV000007	226	9619	7534	7497	8785	5877	89	123	1803	6174	3416	6197	588	935	7343	3605	12069	2730	173	5419	831	5937	15105	3473	2089	2064	2517	3179	2026	5210	136	3543	6405	1528	3426	4809	4302	806	441	3040	2030	7122	3970	5722	2234	2677	5864	1936	1975
ASV000008	30	25	299	221	3889	51	11	235	1704	27	631	319	10	20	106	1862	209	474	50	29	3900	5398	414	873	14412	4255	4715	28160	1383	637	4586	37767	2707	8288	15816	6010	488	23425	1357	34117	1724	7007	12043	29673	1529	3344	2913	52812	7562
ASV000009	7910	4465	3549	3719	3007	6324	165	945	4738	4913	5398	2034	671	8383	179	3871	1959	131	90	3098	1992	8551	1852	298	3521	2799	1760	2264	2798	8539	7924	3030	3927	2287	5186	6108	2371	1396	1126	2159	2401	5125	3411	4573	1470	1577	105	655	300
ASV000010	1871	218	211	8224	113	861	17178	881	1998	822	1137	1497	583	132	811	345	661	877	1093	12286	0	59	192	90	1479	71	7527	117	17	5558	15	177	267	788	120	59	482	55	19	152	4158	226	697	81	439	2518	109	36	323
ASV000011	37	96	29116	10304	92	16403	6	110	0	25	48	907	31	34	26	13880	11	59	95	39	978	2996	152	101	1157	592	5579	4275	10082	71	0	3415	123	130	8338	1611	120	843	58	59	19996	4650	78	8861	194	24341	24	71	64
ASV000012	16357	5690	222	1448	158	247	26022	38119	790	359	19271	2980	1460	27615	1040	3590	3402	1979	15516	7348	33	36	35	33	39	55	330	41	41	3902	24	36	56	24	70	60	294	0	0	320	1265	162	0	29	418	10020	62	0	3038
ASV000013	0	6604	2472	2091	228	974	1801	3356	479	1745	1115	3797	4385	278	5984	998	317	5230	130	658	905	2078	4026	679	969	630	10295	1362	2472	75	2783	975	4176	1321	120	234	550	558	385	616	791	1873	5226	5724	628	1133	1868	560	362
ASV000014	18009	146	8528	157	1309	2546	288	82	471	617	3767	3582	854	1116	493	600	48	78	0	44	726	3284	673	5157	8715	615	3562	2847	508	218	0	3049	13167	1472	2744	2460	672	518	122	1140	383	3976	585	1559	989	619	108	280	280
ASV000015	950	35	4768	378	285	1209	935	39	2639	154	1394	1584	263	40	201	5659	573	121	73	1482	46	1736	351	2396	15664	142	2130	5818	1681	5685	65	8640	760	3276	408	95	653	76	1704	792	361	1134	551	390	1687	473	530	167	1277
ASV000016	224	459	180	4494	946	1970	116	153	660	1053	840	4106	368	997	7090	2775	220	4872	5015	722	892	2405	3857	3911	2962	795	4717	1550	1700	236	2275	1631	3426	2374	977	359	7177	427	788	985	1867	812	1729	2626	715	952	289	2797	1129
ASV000017	4888	6058	3335	3150	197	2448	7923	7558	1836	1272	3977	436	998	12024	2373	587	2346	992	61	417	48	23	24	12	45	27	169	202	871	4557	343	101	63	265	67	1576	23	97	26	109	993	568	1935	564	94	806	380	28	365
ASV000018	59	88	21282	19	8838	60	0	42	52	4139	2240	7	6218	50	0	4184	38	70	54	8	2826	5600	5811	270	1319	2149	70	7362	221	76	45	9104	3460	85	141	322	4271	5328	62	104	7036	9650	101	57	82	3197	87	7250	37
ASV000019	38	840	888	30	349	1271	68	110	2080	1573	2229	5776	11651	188	797	642	1232	256	1646	107	584	2730	5762	1847	2143	623	1719	1413	5631	622	6212	879	3124	1297	859	727	4823	416	321	1867	3736	3597	2643	2371	772	1823	96	1288	1466
ASV000020	29	67	4722	147	180	258	37	27	556	1216	3862	462	3402	105	221	848	346	3142	87	23	824	375	8470	11590	2508	1533	5820	1384	3431	285	414	552	170	420	199	99	1467	2052	2792	231	3187	351	2123	1730	2887	845	2866	2548	3359
ASV000021	0	0	6970	0	0	0	55	0	0	1858	0	0	0	0	37	1127	0	0	0	0	1917	2121	66	215	619	1948	12834	3092	5539	9381	97	3775	12507	17220	581	6607	5269	386	3331	56	1431	108	122	2498	6039	584	63	641	51
ASV000022	320	78	14	0	0	0	0	0	82	286	0	0	0	0	0	0	12	0	0	51	0	54	11243	81	740	76	3503	467	803	591	2713	530	239	81401	288	169	26102	57	97	296	465	1778	4236	130	71	43	121	220	1625
ASV000023	122	1284	1709	1554	1377	2420	141	11501	11798	2514	7180	7993	644	5848	209	2274	900	78	1713	697	1993	9	17	18	6	45	155	2649	626	487	35	231	2408	510	6053	7017	4026	1495	231	897	119	388	312	42	646	5861	57	21	338
ASV000024	5522	44	51	70	52	30	4794	7947	81	61	74	4504	92	1767	3415	42	4427	252	56	1449	0	0	0	0	0	0	25	0	0	0	0	0	0	0	0	30	0	0	0	0	0	0	0	184	28	0	1094	0	8
ASV000025	0	0	0	0	0	0	0	0	217	77	0	0	0	0	0	0	173	0	0	0	0	0	0	0	0	0	0	0	0	0	0	0	0	0	0	0	0	0	0	0	0	0	0	0	0	0	0	0	0
ASV000026	0	1544	1473	1119	241	1796	0	94	433	1399	2340	1157	6900	2932	345	1075	0	3203	436	53	292	1691	0	543	797	315	0	288	2070	120	0	402	1436	170	1458	1265	938	356	0	1493	248	514	1206	584	0	0	1197	535	2643
ASV000027	907	706	62	457	1362	951	25	1583	63	329	638	401	410	331	499	413	959	4769	64	852	122	339	1267	942	380	138	465	1632	332	180	111	2230	996	427	794	333	2660	274	203	5775	109	345	349	1989	518	2509	345	135	513
ASV000028	28	395	2153	0	27	66	36	41	111	3299	305	1242	254	86	631	342	351	1584	0	52	80	432	10262	393	344	215	5471	114	1281	47	585	80	85	100	41	46	250	94	785	844	822	113	1960	470	461	144	7836	537	264
ASV000029	88	952	735	308	537	375	295	87	270	416	1504	1264	84	868	763	236	822	27	16	35	1024	1023	1244	492	1602	963	60	1210	1042	1045	3291	882	3260	515	1340	867	2093	198	195	132	1456	1242	74	930	277	1029	65	2160	488
ASV000030	0	0	2663	0	0	0	0	0	0	0	0	0	0	0	0	0	0	0	0	0	22	1812	81	97	44	36	5702	0	28	42	40	33	31	0	0	60	33	89	4908	42	11457	84	50	53	105	10018	42	1758	0
ASV000031	0	0	0	0	1027	0	0	0	0	34	0	0	0	521	0	0	0	0	0	0	0	155	0	44	0	0	43	0	0	171	0	120	0	0	79	0	0	0	66	179	0	0	0	0	0	0	0	0	152
ASV000032	3947	797	168	482	51	87	588	38	73	0	200	121	0	92	0	51	134	744	8836	1606	101	209	82	315	688	82	425	149	71	803	0	262	1567	242	317	113	182	195	0	200	51	486	243	164	53	96	484	0	115
ASV000033	0	9	0	12	946	140	30	27	292	860	475	80	979	754	29	86	4	9	0	5	13	32	687	110	245	8	86	674	50	51	3941	621	4493	665	261	249	2347	74	25	983	29	75	0	17	230	35	48	37	371
ASV000034	79	0	0	0	0	0	118	0	170	0	0	0	0	0	0	0	0	2	0	0	0	0	0	36	0	0	179	0	0	0	15	0	28	0	0	0	5	14	0	29	509	55	681	0	27	0	9060	28	25
ASV000035	198	324	123	325	406	757	0	657	189	94	486	411	980	250	741	378	0	1492	0	0	3445	901	550	395	1016	1752	497	484	746	74	196	556	215	355	360	181	652	336	223	193	445	393	118	1364	294	413	292	554	425
ASV000036	0	0	0	0	0	0	0	0	0	0	0	0	0	0	0	0	0	0	0	0	0	0	0	0	0	0	0	0	0	0	0	0	0	0	0	0	0	0	0	0	0	0	0	0	0	0	0	0	0
ASV000037	966	357	20	251	148	409	7	143	6	58	54	382	1129	180	567	432	223	2068	13	206	63	26	885	16	436	92	849	32	48	19	452	33	456	567	10	0	554	0	49	507	49	118	70	1710	44	336	78	104	19
ASV000038	0	19	0	14	0	1634	0	479	0	0	0	0	0	0	0	0	0	0	0	58	0	0	0	0	0	0	314	38	0	0	0	92	0	0	350	4489	0	0	0	2959	0	0	0	0	0	0	0	0	0
ASV000039	0	363	33	59	2125	299	0	0	151	873	114	135	0	0	271	213	0	49	0	0	77	1251	2898	433	220	123	313	153	0	0	0	203	427	755	381	138	198	223	49	80	380	3641	2076	458	27	881	17	157	197
ASV000040	0	0	0	0	0	0	0	0	0	1022	0	0	459	174	0	0	0	0	0	0	1418	449	0	103	0	5706	0	0	0	0	8028	309	0	0	0	0	0	4824	0	257	0	59	244	0	0	0	4363	61	3193
ASV000041	37	0	18	0	0	0	41	176	47	0	2495	1167	19	0	0	0	391	0	0	0	0	18	2003	19	12	0	0	50	41	0	0	73	4430	16	670	0	1487	0	0	0	0	35	20	0	0	0	17	1315	0
ASV000042	0	0	0	0	0	0	0	0	0	0	0	0	0	0	0	0	0	0	0	0	558	39	78	30674	33	1203	33	0	199	0	0	22	94	0	704	8	0	0	0	0	0	82	0	332	300	0	91	0	0
ASV000043	0	0	15	3	4	0	0	8	0	0	30	0	4	0	7	4319	5	0	60	949	395	3837	25	24	9	299	0	192	0	5	7	225	11	0	0	0	0	66	9	8	3304	25	3	11	0	0	10	0	0
ASV000044	0	0	0	0	0	0	0	0	0	0	0	0	0	0	5538	147	940	36	40	0	40	0	1003	0	0	38	161	0	0	1758	48	0	0	0	0	0	0	737	17	6603	95	0	0	4658	1650	0	76	0	75
ASV000045	0	0	0	0	0	0	0	0	1593	0	0	0	0	0	0	0	0	0	0	0	0	10837	7915	2713	1772	0	0	0	0	0	708	0	0	0	1532	0	0	0	0	32	0	0	0	0	0	0	2473	0	0
ASV000046	0	0	0	0	0	0	0	0	536	0	0	4	0	0	0	0	76	0	0	0	31	0	0	12	0	0	8	0	8	0	0	0	19	0	0	7	0	27	0	11	0	35	10	7	2992	0	6310	0	10
ASV000047	358	254	111	209	383	783	132	62	93	232	195	107	23	343	0	487	338	491	0	0	36	59	119	36	254	82	420	424	141	175	0	379	265	65	30	52	546	28	118	126	71	0	215	86	259	290	0	45	55
ASV000048	70	890	2170	2811	220	1508	10	223	17	405	9	36	73	806	10	0	151	27	259	72	15	100	128	8	747	56	209	30	25	191	34	32	16	8	40	0	770	3	0	0	0	70	69	33	14	60	10	0	83
ASV000049	0	0	30	0	193	228	0	3	0	0	991	5	757	0	6	179	149	3	7	3	211	397	160	0	408	287	214	106	249	0	16	117	370	26	332	53	24	280	70	207	121	453	0	1251	42	90	0	1061	96
ASV000050	0	0	0	0	0	0	0	0	0	0	0	0	0	0	0	0	99	0	0	0	0	0	357	0	0	0	2812	0	0	0	0	0	0	0	0	0	0	0	935	0	121	0	0	0	850	506	0	0	0
ASV000051	0	0	0	0	0	0	0	0	0	450	0	0	0	0	0	0	0	0	0	0	0	0	0	0	0	0	0	0	114	0	0	0	0	0	0	0	3898	0	134	0	204	127	178	0	193	211	0	573	141
ASV000052	0	0	0	0	12	8	14	12	23	11	554	15	11890	8	0	0	0	0	0	0	250	1366	0	348	99	447	247	40	412	5	0	71	204	26	53	146	112	345	157	0	165	0	0	290	220	0	7	7	0
ASV000053	0	0	0	0	0	0	0	0	0	0	0	0	0	0	0	0	0	0	0	0	0	0	0	0	36	0	0	0	8177	287	0	46	51	64	5288	89	0	0	32	0	0	30	0	235	5458	0	0	0	0
ASV000054	0	13	10	804	425	0	0	0	0	0	0	11	93	0	17	11	0	13	23	12	0	20	39	731	31	0	0	0	0	3	4967	5	4	12	0	4	0	0	0	32	19	3	17	0	0	0	18	38	10
ASV000055	0	0	51	0	0	0	0	0	224	0	9	0	0	0	0	118	0	0	0	0	7	16	29	6723	251	44	23	12	0	0	8	16	23	17	8	0	17	51	48	47	45	53	545	4667	49	60	399	849	0
ASV000056	127	0	0	782	0	153	1372	100	0	187	102	259	301	0	44	17	46	162	54	0	0	0	0	0	63	0	370	0	38	0	0	0	0	37	0	0	0	0	0	0	110	0	0	0	0	0	0	0	0
ASV000057	0	0	0	0	0	0	0	0	6	0	0	0	0	0	0	0	0	0	0	0	0	0	0	26	6	0	0	114	0	0	15	17	20	0	0	0	0	414	0	18	0	22	0	163	0	227	14192	11	21
ASV000058	0	0	0	0	0	0	0	0	0	0	0	0	0	0	0	0	0	0	0	0	195	155	1220	0	75	217	101	209	523	78	3321	184	33	0	687	0	3841	0	0	69	78	3151	1019	59	56	33	0	0	1307
ASV000059	0	0	0	0	485	0	0	0	0	0	0	0	0	0	0	0	0	2886	0	0	0	0	0	0	0	0	0	164	213	1130	0	0	954	0	0	0	0	0	0	502	0	0	0	0	0	132	325	0	646
ASV000060	251	710	89	72	1819	38	4	29	49	16	32	12	44	33	0	10	28	0	372	0	0	0	0	3	0	0	0	0	0	6	7	4	6	0	0	0	154	7	0	0	3	0	7	0	0	0	0	0	0
ASV000061	0	0	0	0	0	0	12	0	5063	0	0	0	0	0	0	0	472	0	0	9	3356	67	0	0	0	2404	0	0	0	0	109	0	0	0	0	441	0	0	0	0	0	0	0	0	634	0	224	26	0
ASV000062	79	241	341	215	37	387	1453	49	46	32	109	145	61	393	31	93	51	95	166	429	41	119	22	19	82	33	334	50	28	972	51	61	129	204	150	0	51	30	0	6	213	37	34	19	61	4	126	0	35
ASV000063	0	0	0	504	0	694	0	0	0	0	0	0	0	220	1224	0	395	78	0	0	758	0	0	75	87	438	0	787	169	0	0	888	246	0	692	204	80	119	0	0	0	2000	0	0	101	0	0	520	234
ASV000064	0	0	17	0	0	0	9	8	277	22	440	11	2162	0	0	48	65	0	10	0	100	130	0	0	0	102	84	0	352	13	16	0	17	0	22	21	30	1003	92	39	92	105	25	1361	149	0	0	3023	692
ASV000065	0	0	49	0	0	0	0	0	210	0	522	0	0	0	0	50	0	0	0	0	142	335	0	4020	132	76	62	0	752	0	0	0	137	0	36	0	0	0	0	0	0	44	0	679	0	53	636	313	0
ASV000067	0	0	0	0	30	0	0	0	0	790	0	0	0	0	0	258	0	0	0	0	0	32	0	3916	40	26	0	47	0	0	0	36	32	345	0	0	25	0	104	0	0	31	424	0	0	73	0	0	0
ASV000068	50	0	0	56	0	0	0	9	701	8	514	260	0	0	0	277	494	0	0	0	156	0	273	140	0	624	0	375	394	0	493	153	160	99	0	0	258	0	0	77	0	0	0	0	384	0	0	0	30
ASV000069	0	0	292	5	0	40	0	0	0	0	42	0	0	0	0	30	0	0	0	0	64	86	26	386	92	31	924	67	0	0	96	0	0	0	20	13	70	45	228	25	251	0	0	36	45	130	30	115	29
ASV000070	0	0	0	0	0	0	0	0	0	0	1519	0	0	0	0	0	0	0	0	0	0	0	0	0	0	0	0	0	450	0	0	0	0	0	353	0	0	0	0	0	0	0	10293	0	0	0	0	0	0
ASV000071	0	0	50	289	63	154	5	8	33	86	505	155	338	0	0	67	0	0	0	5	127	8	34	0	21	116	213	257	181	20	275	150	242	67	122	343	262	237	70	13	185	189	0	939	184	84	0	1766	238
ASV000072	0	0	945	0	0	0	0	0	0	0	0	0	0	0	0	0	0	0	0	0	0	1613	0	0	480	0	0	239	0	0	0	356	0	0	720	0	0	0	0	0	0	0	0	0	0	0	0	0	0
ASV000073	0	0	68	0	0	0	0	0	39	20	173	0	65	0	0	0	0	0	0	0	39	312	92	1093	0	65	0	29	274	12	0	31	40	49	0	42	0	188	140	35	500	20	52	1285	192	23	0	508	81
ASV000074	0	0	0	0	0	0	0	0	0	0	0	0	0	0	0	0	0	0	0	0	0	0	0	0	446	0	0	0	0	10899	0	0	0	0	0	0	0	0	0	0	0	0	0	0	0	0	0	0	0
ASV000075	0	0	0	1063	0	0	0	0	0	0	0	0	0	99	0	597	0	0	0	695	0	335	0	368	0	0	0	0	0	0	0	0	0	1034	391	514	0	0	0	228	164	0	0	0	0	0	414	157	0
ASV000076	35	13	30	40	3710	33	0	85	18	1081	5	17	60	37	0	0	31	7	7	16	14	47	4	28	13	25	22	0	5	32	35	16	20	32	57	11	0	8	42	10	4	24	18	19	28	20	16	13	28
ASV000077	0	0	0	0	0	0	0	0	0	0	109	12	445	0	0	72	0	0	0	0	0	98	423	1131	604	0	22	106	656	12	0	128	18	11	154	0	529	1300	635	0	37	35	697	58	24	34	0	15	0
ASV000078	0	0	0	48	23	0	11	0	17	63	74	27	909	14	0	19	146	12	12	0	91	30	10	157	14	85	22	0	27	197	29	9	15	0	34	23	17	86	10	40	15	53	26	53	22	14	87	31	69
ASV000079	0	0	0	0	0	0	0	0	0	0	643	0	0	0	0	0	0	0	0	0	19	5	16	9	15	0	1553	331	0	0	0	40	0	23	29	81	11	936	0	19	1895	16	15	9	17	772	0	3255	279
ASV000080	50	83	40	24	1404	0	0	50	618	66	16	17	0	83	0	0	20	80	15	0	41	914	44	0	1375	61	0	112	40	48	171	198	118	40	231	0	1821	37	0	465	0	28	1853	26	0	0	0	130	0
ASV000081	0	0	0	235	0	0	0	0	0	0	0	0	0	0	0	106	0	0	8857	0	0	0	0	0	0	0	0	0	0	0	0	0	0	0	0	0	0	0	0	0	0	0	0	0	0	0	0	0	0
ASV000082	0	0	0	0	0	0	0	0	0	0	0	0	0	0	0	0	0	0	0	0	0	0	0	0	0	0	0	0	0	0	0	0	0	0	0	25	0	0	0	0	0	0	0	0	0	0	0	0	0
ASV000083	260	0	6	58	0	12	34	98	0	197	0	10	0	7	6	63	0	0	23	6	170	7	1493	36	42	191	207	11	68	1063	0	17	46	4	68	76	14	197	0	0	71	66	94	47	73	12	229	0	40
ASV000084	42	195	46	31	41	0	0	417	0	92	0	33	0	0	53	52	0	100	83	705	0	21	56	0	82	8	27	79	0	0	70	98	0	0	0	0	295	0	0	40	0	22	29	0	0	0	0	0	0
ASV000085	13	17	161	15	83	0	4	7	21	127	10	8	274	109	0	7	14	8	72	49	2551	0	12	8	161	2375	151	36	8	342	9	133	6	25	12	15	54	69	0	19	0	18	0	3	3	0	5	10	23
ASV000086	44	148	55	40	92	8	11	264	30	147	0	37	0	0	0	0	19	321	84	1106	0	0	0	0	25	15	0	10	0	0	31	17	0	0	0	0	96	19	0	36	0	0	0	0	0	0	0	0	0
ASV000087	0	0	0	8602	12	0	0	0	0	4	0	626	0	0	0	0	0	0	0	14	0	0	0	0	0	0	0	0	0	0	0	0	0	0	0	0	0	0	0	0	0	0	0	0	0	0	0	0	0
ASV000088	380	7	3	20	541	79	6	85	720	39	0	0	9	73	13	8	10	135	12	0	309	43	6	35	21	388	699	8	67	10	7	7	0	0	86	78	0	64	0	295	0	93	4	8	0	5	0	158	457
ASV000089	0	0	85	0	524	0	0	0	0	0	0	0	65	79	0	0	20	0	0	0	39	564	17	0	123	27	294	0	0	0	0	0	0	17	43	170	0	401	128	0	219	0	26	1216	0	99	0	2033	383
ASV000090	0	0	0	0	0	0	689	0	57	0	0	511	325	0	0	0	1118	0	600	0	0	0	0	0	0	0	0	106	0	0	0	36	0	0	0	0	0	0	0	0	0	0	0	0	0	0	405	0	0
ASV000091	0	0	18	5	51	0	0	0	0	22	82	0	0	0	0	9	0	0	0	0	247	172	181	392	34	325	211	0	194	12	15	0	48	20	180	93	50	2097	538	96	110	58	23	83	292	136	338	45	58
ASV000092	0	0	0	0	0	0	0	0	0	0	0	0	0	0	0	0	0	0	0	0	19	0	0	0	0	0	0	0	0	0	0	0	0	0	0	0	0	79	0	0	0	0	0	0	0	45	7159	0	0
ASV000093	0	0	0	0	0	0	0	0	0	0	1092	0	0	0	0	0	0	0	0	0	0	0	0	0	0	0	0	385	0	2258	0	381	0	0	0	0	0	0	0	0	0	0	0	0	335	0	0	0	0
ASV000094	0	0	0	0	60	0	0	0	0	0	0	0	0	0	0	0	0	0	0	0	31	0	4	1067	0	0	7	0	24	3	3	0	2	0	0	0	10	6024	11	0	23	23	18	10	16	0	0	0	3
ASV000095	0	0	877	0	0	25	0	0	26	0	0	0	0	0	0	0	0	0	0	0	0	46	47	216	245	0	1376	87	173	0	0	51	36	0	0	0	0	0	62	0	143	49	0	27	0	128	1431	75	0
ASV000096	0	0	0	0	0	0	0	0	182	0	51	18	213	0	0	0	0	0	0	0	70	0	35	73	20	171	41	8	1295	7	0	0	0	18	158	8	0	39	40	0	0	0	373	131	637	0	0	20	2083
ASV000097	0	0	0	0	865	0	0	0	0	0	137	0	0	260	0	0	0	0	0	0	0	0	0	0	0	0	0	0	0	0	0	0	0	0	0	0	0	0	0	1221	0	0	0	307	0	90	0	0	0
ASV000098	0	0	0	0	10	0	6	0	0	13	10	24	4267	9	0	0	0	0	0	0	0	31	0	0	0	0	0	0	0	0	0	0	0	0	0	5	0	0	0	258	11	0	0	0	794	30	587	0	0
ASV000099	0	0	0	0	106	0	0	0	0	0	0	0	0	0	0	0	0	0	0	0	0	0	0	1181	12	0	0	0	0	0	0	0	0	13	0	0	0	0	0	0	0	0	24	0	0	0	0	4852	0
ASV000100	0	0	0	0	0	0	0	0	103	0	29	0	173	0	0	0	24	8	0	0	177	0	35	0	12	358	0	0	21	28	63	0	0	0	78	0	37	100	29	36	0	0	0	82	130	0	4599	79	41
ASV000101	174	0	0	0	0	0	257	497	0	0	221	0	18	0	0	0	1137	54	454	0	0	0	0	0	0	0	0	0	0	19	27	0	0	0	0	0	0	0	0	29	0	0	0	0	0	0	3239	25	0
ASV000102	3	0	99	0	0	0	0	0	0	0	19	49	41	0	0	0	0	0	0	0	0	20	10	0	72	0	0	31	0	8	0	0	0	0	0	0	0	0	626	0	158	0	13	0	0	0	0	125	0
ASV000103	0	0	0	0	0	0	0	0	190	0	120	0	0	0	0	0	0	0	9	0	0	781	0	273	16	0	0	0	28	0	6	0	201	14	23	198	0	0	5	0	324	7	133	188	296	45	365	0	0
ASV000104	0	0	0	9	7	0	0	0	26	11	24	9	294	17	0	0	84	16	0	0	42	20	12	0	17	23	20	34	44	205	14	21	27	7	91	93	17	30	0	34	0	37	10	15	8	25	400	28	1815
ASV000105	0	0	0	0	0	0	0	0	0	0	0	0	0	0	0	0	0	0	0	0	0	0	0	0	0	0	0	1957	0	0	0	2694	0	0	1839	0	0	0	0	0	0	0	0	0	0	0	0	0	0
ASV000106	0	0	0	0	6	0	0	0	0	0	0	0	5	0	0	2	0	0	0	0	0	0	0	0	0	0	0	0	1407	0	0	0	0	0	0	0	0	0	0	0	0	0	0	0	0	0	0	0	0
ASV000107	0	0	0	0	0	0	0	0	0	0	0	0	0	1221	676	0	733	2272	0	0	0	0	0	404	0	0	0	0	0	0	0	0	0	0	0	0	0	0	0	0	0	0	0	0	0	0	0	0	0
ASV000108	0	0	44	0	0	24	0	0	70	0	385	0	246	0	0	17	0	0	0	0	315	29	67	56	26	409	65	0	416	0	0	0	0	8	16	103	9	104	34	0	31	15	0	1419	80	25	0	500	99
ASV000109	0	0	0	0	0	0	0	0	0	0	0	0	0	0	0	0	0	0	0	0	112	0	0	93	0	94	0	1129	0	0	0	1197	0	0	311	0	0	0	0	0	0	854	0	0	0	0	0	0	0
ASV000110	0	101	64	13	110	31	0	309	53	164	0	30	24	0	0	50	30	37	163	526	18	0	30	0	59	0	18	37	10	0	80	92	25	0	15	0	252	0	13	31	0	11	0	0	0	0	0	24	0
ASV000111	0	0	0	0	0	0	0	0	0	0	0	0	0	0	0	0	0	0	0	0	2067	1352	0	6	0	1603	0	0	0	0	9	0	0	0	4	0	505	10	14	0	0	0	0	8	0	0	12	165	12
ASV000112	5	0	60	0	0	0	0	0	179	250	0	8	42	0	0	0	0	0	0	0	0	28	711	931	0	0	33	0	0	0	0	0	0	0	53	223	141	0	0	7	0	228	49	0	0	211	0	0	36
ASV000113	0	0	0	0	0	0	0	0	0	0	0	0	0	0	0	0	0	0	0	0	0	0	0	0	0	0	0	0	0	0	0	0	0	0	0	0	0	0	0	0	0	0	0	0	0	0	0	0	0
ASV000114	0	0	0	0	0	0	0	0	0	0	0	0	0	0	0	0	0	0	0	0	0	0	0	0	0	0	0	0	0	0	0	0	0	0	0	0	0	0	0	0	0	0	0	0	0	0	0	0	0
ASV000115	27	0	0	29	0	0	0	0	0	29	0	18	0	15	15	0	11	0	5	0	0	0	13	0	0	0	42	0	12	1181	0	0	0	0	0	0	17	0	0	9	0	19	20	0	0	0	13	0	0
ASV000116	0	0	0	0	0	0	0	0	0	0	0	0	0	0	0	0	0	0	0	0	0	0	0	0	0	0	0	0	0	0	0	0	0	0	0	0	0	0	0	0	0	0	0	0	0	0	0	0	0
ASV000117	26	26	3	0	0	6	109	42	16	0	0	35	0	16	0	0	43	42	531	4	1306	17	0	68	0	763	0	8	13	0	32	4	9	0	62	0	0	0	0	17	0	15	22	7	0	0	302	0	154
ASV000118	0	0	8	0	0	0	0	0	62	30	88	14	493	9	0	0	87	0	0	0	55	210	45	217	15	111	22	8	171	0	0	17	0	0	26	32	0	265	35	44	40	0	39	445	97	26	110	303	83
ASV000119	0	0	0	0	0	0	0	0	253	0	0	0	0	0	0	0	5	0	0	0	0	0	0	0	0	0	0	2	695	0	0	0	0	0	0	0	0	0	119	0	0	0	0	0	0	0	0	0	0
ASV000120	32	0	0	381	0	65	633	39	0	71	0	0	129	0	0	0	0	71	45	0	0	0	0	0	0	0	88	0	0	0	0	0	0	0	0	0	0	0	0	0	0	0	0	0	0	0	0	0	0
ASV000121	0	0	0	0	0	0	1258	0	0	0	0	0	0	0	0	416	0	0	0	0	0	0	0	0	0	0	0	0	0	0	614	0	0	0	0	0	0	0	0	0	0	0	0	0	0	0	0	0	105
ASV000122	0	0	0	0	0	0	0	0	0	0	0	0	0	0	0	126	0	0	0	0	21	0	0	0	0	0	0	90	0	0	0	136	0	165	0	0	0	0	342	0	0	0	0	0	0	24	0	0	0
ASV000123	0	0	3	0	7	18	0	0	0	0	25	0	146	0	0	0	13	0	0	0	85	15	28	487	10	191	31	43	65	15	318	36	0	0	0	0	192	0	30	64	20	12	40	73	156	19	1204	0	35
ASV000124	0	0	0	0	13	0	0	0	40	0	0	17	77	5	0	0	0	0	8	0	1015	0	8	371	0	1047	33	0	1049	0	44	12	12	0	0	0	16	0	0	0	0	0	0	0	163	0	0	0	128
ASV000125	0	0	0	0	0	0	11	0	0	0	0	0	0	0	4268	0	12	442	0	0	0	0	0	0	0	0	0	0	0	0	0	0	0	0	0	0	0	0	0	0	0	0	0	0	0	0	0	0	0
ASV000126	0	386	21	30	83	0	0	69	0	76	0	0	0	0	39	0	0	0	42	61	24	0	0	0	80	25	0	78	0	0	27	131	0	0	0	0	29	0	0	41	0	0	0	0	0	0	0	0	0
ASV000127	47	0	0	5	0	0	0	0	277	8	0	5	0	0	0	31	0	0	0	0	0	0	6	0	6	0	0	0	481	0	0	0	3	0	0	0	0	14	108	0	6	0	0	0	0	0	0	12	0
ASV000128	0	0	0	0	0	0	6	0	0	0	0	0	0	0	0	0	0	192	0	0	0	0	0	0	0	0	0	0	0	0	0	0	0	0	0	0	0	0	0	0	0	0	0	0	0	0	0	0	0
ASV000129	0	0	0	0	37	0	0	0	246	0	0	0	339	0	0	0	0	0	0	0	119	0	28	0	0	390	0	0	172	0	0	22	0	0	18	0	0	1468	34	0	0	0	0	524	31	0	0	95	56
ASV000130	0	0	0	0	0	0	0	0	0	0	0	0	0	0	0	0	0	0	0	0	0	0	0	0	0	0	0	0	0	0	0	0	0	0	0	0	0	0	0	0	0	0	0	0	0	0	0	0	0
ASV000131	0	0	0	0	0	0	0	0	0	0	0	0	0	0	0	0	0	0	0	0	413	231	0	877	0	1247	9	0	0	0	0	0	0	0	0	0	92	7	0	0	0	0	0	681	707	0	0	10	7
ASV000132	0	0	5	0	0	29	0	0	0	0	166	12	126	4	0	0	15	0	5	0	35	12	200	322	8	119	8	0	105	8	35	0	0	5	0	0	0	0	0	23	5	0	0	38	18	0	52	0	25
ASV000133	0	0	0	0	0	0	0	0	0	0	353	0	0	0	0	0	0	0	0	0	0	0	0	0	0	0	0	11	0	0	0	0	0	0	0	0	278	0	0	0	0	0	0	0	0	0	0	0	0
ASV000134	0	32	0	0	0	0	0	0	0	0	84	109	0	16	0	15	0	0	0	0	138	31	810	22	26	99	0	0	20	0	0	19	0	0	0	0	21	17	0	0	0	0	0	0	81	0	0	0	0
ASV000135	0	0	0	0	810	0	0	0	422	0	138	13	6	0	0	15	0	0	0	0	279	0	0	0	0	417	0	0	37	0	0	0	0	0	102	78	0	296	0	0	0	0	0	76	145	0	0	182	275
ASV000136	0	0	0	0	0	0	0	0	0	0	0	1598	0	0	0	0	0	0	0	0	0	0	0	0	0	0	0	0	0	0	0	0	0	0	0	0	0	0	0	749	0	0	0	0	0	0	0	0	0
ASV000137	0	0	8	0	0	0	0	0	0	0	0	0	0	0	0	0	0	0	0	0	0	0	0	0	0	0	17	0	0	0	0	0	0	88	0	0	0	0	0	0	0	0	0	0	652	0	0	0	81
ASV000138	0	0	0	0	731	0	0	0	78	540	0	0	0	0	0	0	0	0	0	0	0	0	0	0	89	0	0	0	0	0	0	0	0	0	0	901	0	0	0	1180	0	0	230	0	0	0	0	0	0
ASV000139	0	0	0	0	135	0	0	0	0	0	0	0	0	0	0	0	0	0	0	0	0	0	23	1614	0	9	13	0	0	0	0	0	0	0	0	0	0	253	0	0	0	12	0	788	0	0	4	0	0
ASV000140	0	0	0	0	179	0	0	300	0	0	24	37	0	53	10	0	11	0	0	0	146	6	0	0	0	121	0	0	28	205	1407	0	0	0	0	0	2	60	11	15	0	0	0	62	0	0	0	5	267
ASV000141	0	0	0	0	6	0	0	0	149	0	0	0	45	0	0	0	0	0	0	2	0	37	0	0	0	0	0	6	804	3	0	7	0	0	0	14	0	0	0	0	14	37	0	591	126	3	96	68	58
ASV000142	224	119	0	48	5	0	447	49	0	0	0	0	0	22	75	0	16	94	1168	29	0	0	0	0	0	0	0	0	0	121	28	0	0	6	20	50	0	0	0	10	0	0	0	0	0	0	25	0	0
ASV000143	0	0	0	0	0	0	0	0	0	0	33	69	0	0	0	0	0	0	0	0	666	0	18	771	15	1020	8	0	0	0	0	0	0	0	43	0	0	653	0	0	0	0	7	165	0	0	0	0	0
ASV000144	0	0	0	0	0	0	8	0	119	0	426	626	103	0	0	0	0	0	0	0	180	0	0	0	2	0	0	315	0	0	0	61	368	8	348	602	0	54	0	0	0	41	0	0	0	0	0	0	0
ASV000145	0	0	0	0	0	0	0	0	0	0	0	0	0	0	0	0	0	0	0	0	0	0	0	0	0	0	0	0	0	0	0	0	0	0	0	0	0	0	0	0	0	0	0	0	0	0	1055	0	0
ASV000146	0	0	0	0	8	0	0	0	47	0	197	21	0	0	0	13	8	0	0	0	217	82	0	0	14	605	0	0	20	0	0	0	0	0	9	27	0	480	26	36	0	115	0	246	103	0	0	176	0
ASV000147	0	0	0	0	0	0	0	0	0	0	0	0	0	0	0	0	0	0	0	0	64	138	47	367	0	85	0	0	158	0	0	0	0	0	44	0	90	103	90	17	0	0	0	72	62	0	222	70	106
ASV000148	0	0	0	0	0	0	0	0	338	0	275	873	0	0	0	0	0	0	0	0	20	0	0	0	0	0	0	0	221	0	0	0	0	0	149	523	0	5	11	0	0	0	0	0	0	109	0	0	312
ASV000149	0	55	0	0	0	0	0	0	0	0	0	0	23	0	0	34	0	0	0	158	13	0	0	0	0	0	0	0	0	0	0	0	0	0	0	0	0	0	0	0	0	0	0	0	0	0	0	0	0
ASV000150	979	0	0	0	0	0	0	0	0	0	0	180	0	0	0	0	0	0	0	0	0	0	0	0	0	0	0	0	127	0	0	22	0	0	381	642	0	74	25	0	0	0	0	0	0	0	0	0	0
ASV000151	0	0	0	0	939	0	0	0	142	0	0	0	0	0	0	0	0	0	0	0	0	0	0	0	0	0	0	0	0	0	0	0	0	0	0	0	0	0	0	0	0	0	0	0	0	0	0	0	0
ASV000152	0	0	0	0	0	0	0	0	0	0	0	0	0	0	0	0	0	0	0	0	0	0	0	0	0	0	10	0	1451	56	0	0	0	0	0	0	0	792	0	0	14	116	178	196	11	0	0	0	0
ASV000153	0	0	0	0	0	0	0	0	0	0	0	0	0	0	0	591	0	0	0	0	0	0	0	0	0	0	0	0	0	0	0	0	0	0	0	0	0	0	0	1740	0	0	142	0	0	0	0	0	0
ASV000154	0	0	0	0	37	0	0	0	0	0	0	0	3	0	0	6	0	0	0	0	0	0	17	0	0	0	0	0	0	0	0	11	3	0	0	0	0	22	0	9	2158	0	0	11	0	0	0	35	0
ASV000155	0	0	0	0	30	0	0	0	22	5	0	0	284	0	0	0	0	0	0	0	62	117	0	321	0	148	0	0	34	0	0	0	0	0	28	42	9	311	0	11	0	18	0	437	46	0	0	301	17
ASV000156	0	0	0	0	17	0	0	0	21	6	23	0	0	0	0	0	0	0	0	0	46	0	116	0	0	27	0	0	3	0	199	0	28	17	36	0	0	0	0	0	0	0	0	0	0	4	0	0	0
ASV000157	0	0	0	0	0	0	0	12	15	0	0	0	0	0	0	0	0	338	0	0	0	0	0	0	0	0	0	0	0	0	0	0	0	0	0	0	0	0	0	0	0	0	0	0	0	0	0	0	0
ASV000158	0	0	0	0	0	0	0	0	0	0	0	0	0	0	0	0	0	0	0	0	0	0	0	0	0	0	0	0	0	269	0	0	1409	0	0	0	0	0	0	0	0	0	0	0	0	0	0	0	0
ASV000159	0	0	0	0	0	0	0	0	0	0	0	1122	0	0	0	0	0	0	0	0	0	0	0	0	0	0	0	0	0	227	0	0	0	0	0	0	0	0	0	0	0	0	0	0	0	0	0	0	0
ASV000160	0	0	0	0	0	0	0	0	0	0	0	0	0	0	0	0	0	0	0	0	0	0	0	0	0	0	0	0	0	0	0	0	0	0	0	0	0	0	0	0	0	0	0	0	0	0	0	0	0
ASV000161	0	0	0	0	0	0	0	0	0	0	161	0	0	0	0	0	0	0	0	0	213	0	0	0	0	659	0	0	44	0	9	0	0	0	0	10	0	129	0	11	0	0	0	16	60	0	0	564	138
ASV000162	0	0	24	0	0	9	0	0	33	0	0	0	15	0	0	0	11	0	0	0	33	22	42	387	17	75	0	35	59	15	25	11	13	0	12	5	10	32	54	4	13	0	103	52	45	5	0	0	227
ASV000163	0	0	201	0	18	0	0	0	0	0	105	0	0	0	0	0	0	0	0	0	46	0	0	0	0	32	0	0	264	0	0	0	6	0	0	102	0	193	2	0	0	0	0	0	0	68	0	0	58
ASV000164	0	42	0	0	0	0	495	0	0	0	0	0	0	0	0	0	116	0	119	0	0	0	0	0	0	0	0	0	0	0	0	0	0	0	0	0	0	0	0	0	0	0	0	0	0	529	0	0	0
ASV000165	0	0	0	0	0	0	0	0	0	0	0	0	0	0	0	0	0	0	0	0	0	0	0	0	0	0	188	0	0	0	0	0	0	0	0	0	0	0	0	0	416	0	203	0	0	0	266	0	0
ASV000166	0	0	0	0	0	0	0	0	0	0	0	0	0	0	0	0	0	0	0	0	78	0	0	0	0	104	0	0	0	0	0	0	0	0	0	0	0	0	0	0	0	0	0	0	0	0	1499	0	0
ASV000167	1302	0	0	0	0	0	0	0	0	0	0	0	0	0	0	0	0	0	0	0	0	0	0	0	0	0	0	0	0	0	0	0	0	0	0	0	297	0	0	0	0	0	0	0	0	0	0	0	0
ASV000168	0	0	0	0	0	0	0	0	0	0	0	0	0	0	0	0	0	0	0	0	201	0	0	0	0	0	0	602	0	0	0	621	0	0	0	0	0	0	0	0	0	308	0	0	0	0	0	0	0
ASV000169	0	0	0	0	0	0	0	0	0	0	0	0	0	0	0	159	0	0	0	0	0	0	0	0	0	0	0	0	0	0	0	0	0	0	331	348	0	0	0	0	0	0	0	0	0	517	0	0	0
ASV000170	0	0	0	0	0	0	0	0	0	0	0	0	0	0	0	0	0	0	0	0	0	0	211	0	0	0	0	0	0	0	0	0	0	0	0	0	1120	0	0	0	0	0	0	0	0	0	0	0	0
ASV000171	0	0	0	0	16	0	0	0	0	0	0	23	24	0	0	37	0	0	0	0	0	105	27	204	24	0	14	0	167	0	0	0	28	0	0	316	15	112	0	0	0	0	0	111	0	10	0	127	0
ASV000172	0	0	0	0	0	0	0	0	16	0	203	0	0	0	0	0	32	0	0	0	37	25	152	41	0	70	18	17	70	0	0	23	21	5	0	0	0	0	74	0	0	53	111	24	0	0	0	0	0
ASV000173	0	0	0	0	0	0	0	0	0	0	0	0	0	0	0	0	0	0	0	0	0	11	0	0	52	0	81	0	0	0	0	0	0	0	0	0	0	12	50	0	0	0	0	0	0	14	488	0	0
ASV000174	0	0	0	0	0	0	0	0	0	0	0	18	0	0	0	0	0	0	0	0	289	0	126	0	0	939	0	0	0	0	0	0	0	0	0	0	0	0	0	0	0	82	0	0	0	0	0	0	0
ASV000175	0	0	0	0	0	0	0	0	7	0	0	0	13	0	0	0	0	0	0	0	3	0	48	442	24	14	0	0	23	0	131	0	6	0	0	0	16	0	0	0	0	2	4	18	0	0	574	0	2
ASV000176	0	0	0	0	0	0	0	0	0	0	0	0	0	0	0	0	0	0	0	0	0	0	0	0	0	0	0	0	0	0	0	0	0	0	0	0	0	0	0	0	0	0	1163	0	0	0	0	0	0
ASV000177	0	0	0	0	0	0	0	0	0	0	0	0	0	0	0	0	0	0	0	0	0	0	0	107	0	0	0	0	0	0	9	0	0	0	0	23	0	0	0	0	0	10	0	510	44	0	0	875	10
ASV000178	0	0	0	0	0	0	0	0	0	0	0	0	0	0	0	0	0	0	0	0	0	0	0	0	0	0	0	0	0	0	0	0	0	0	0	0	0	0	0	0	0	0	0	0	0	0	0	0	0
ASV000180	0	88	0	0	0	23	0	111	0	0	0	0	0	414	0	0	0	85	205	11	0	0	0	0	0	0	0	0	0	0	0	0	0	0	0	0	85	0	0	0	0	0	0	0	0	0	9	0	0
ASV000181	0	0	0	0	0	0	0	0	0	0	0	0	0	0	0	0	0	0	0	0	0	0	0	0	0	0	0	0	0	0	0	0	0	0	0	0	0	0	0	0	0	0	0	0	0	0	0	0	0
ASV000182	0	0	0	0	0	0	0	0	0	0	0	0	0	0	0	0	0	0	0	0	0	0	0	467	0	0	0	0	0	0	537	0	0	0	0	0	0	0	0	0	0	0	0	329	94	0	0	0	19
ASV000184	0	0	0	0	0	0	0	0	0	0	0	0	0	0	0	0	0	57	0	0	0	0	0	0	0	0	0	0	0	0	0	0	0	0	0	0	0	0	0	0	0	0	0	0	0	0	0	0	0
ASV000185	0	0	0	0	0	0	0	0	0	0	0	0	0	0	0	0	0	67	3	0	0	0	0	0	0	0	0	0	0	0	0	0	0	0	0	0	0	0	0	0	0	0	0	0	0	0	0	0	0
ASV000186	0	0	0	0	0	0	0	0	0	0	0	0	0	0	0	0	0	0	0	0	883	0	0	0	0	466	0	0	0	0	0	0	0	0	0	0	0	0	0	0	0	0	0	0	0	0	0	0	0
ASV000188	0	0	0	0	0	0	0	0	0	0	0	0	0	0	0	0	0	0	0	0	660	0	0	0	0	652	0	0	0	0	0	0	0	0	0	0	0	0	0	0	0	0	0	0	0	0	0	0	0
ASV000189	0	0	0	315	0	534	0	0	0	0	137	0	0	0	0	0	0	0	0	0	0	0	0	0	0	0	0	0	0	0	0	0	0	0	0	0	0	0	0	0	0	0	0	0	0	0	0	0	0
ASV000190	0	0	0	0	843	0	0	0	90	123	0	0	0	0	0	0	0	0	0	0	0	0	0	0	0	0	0	0	0	32	29	0	0	0	17	0	0	0	0	0	0	0	0	0	0	0	0	0	0
ASV000191	0	0	0	0	28	0	0	0	0	0	0	10	0	0	0	0	0	0	0	0	0	0	0	0	6	0	0	0	0	0	0	0	0	0	0	52	0	0	0	0	0	0	0	717	12	0	0	385	0
ASV000192	0	0	0	0	0	0	0	0	163	0	339	0	0	0	0	0	0	0	0	0	0	0	0	0	0	0	135	0	183	0	0	0	0	0	0	0	0	0	0	0	0	0	0	0	0	0	0	0	0
ASV000193	0	0	0	0	0	0	0	0	0	0	0	0	0	0	0	13	0	0	0	0	0	0	0	0	39	0	0	0	0	0	0	0	0	0	0	0	0	584	0	0	0	0	0	0	0	0	0	0	0
ASV000194	0	0	0	0	0	0	0	0	0	0	0	0	0	0	0	0	0	0	0	0	46	8	0	0	0	71	0	0	0	0	0	0	0	0	0	0	0	0	120	0	0	0	0	0	0	0	0	0	0
ASV000195	0	0	0	0	0	0	0	0	0	0	0	0	0	0	0	0	2	0	0	0	0	0	0	0	0	0	0	0	0	0	0	0	0	0	0	0	0	0	0	0	744	0	0	0	0	0	0	0	0
ASV000196	0	0	0	0	0	0	0	0	0	0	0	0	0	0	0	0	0	0	0	0	0	0	0	0	0	0	0	0	0	0	0	0	420	0	0	0	0	0	0	0	0	0	0	186	0	0	0	0	0
ASV000197	0	0	0	0	0	0	0	0	0	0	0	0	0	0	0	0	0	0	0	0	0	0	0	0	0	0	0	498	0	0	0	377	0	0	0	0	0	0	0	0	0	0	0	0	0	0	0	0	0
ASV000198	0	0	0	0	0	0	0	0	0	0	0	0	0	0	0	318	0	0	0	0	0	0	0	0	0	0	0	0	0	0	488	0	0	0	0	0	0	0	0	0	0	0	0	0	0	0	0	0	0
ASV000199	0	0	0	0	0	0	0	0	0	0	0	0	0	0	0	0	0	0	0	0	0	0	0	0	0	0	0	0	0	6	0	0	0	0	0	0	0	0	135	0	0	0	0	0	0	0	0	0	0
ASV000200	0	0	0	0	0	0	0	0	0	0	0	0	0	0	0	0	0	0	0	0	0	0	0	0	0	0	0	0	0	0	0	0	0	0	0	0	0	0	0	0	0	0	0	0	0	0	0	0	0
ASV000201	0	0	0	0	0	0	0	0	0	0	0	0	0	0	0	0	0	0	0	0	0	0	0	0	0	0	0	0	0	0	0	0	0	0	0	0	0	0	0	0	392	0	0	0	0	0	0	0	0
ASV000202	0	0	0	0	0	0	0	0	0	0	0	0	0	0	0	0	0	0	0	0	0	0	0	0	0	0	0	0	0	0	0	0	0	0	0	0	0	0	0	0	0	0	0	0	0	0	0	0	0
[truncated: 47 more columns]

## Sheet: Taxonomy (MWvsHC)
Taxonomy of MW and HC for MicrobiomeAnalyst2
#TAXONOMY	kingdom	phylum	class	order	family	genus	species
ASV000001	d__Bacteria	p__Actinobacteriota	c__Actinomycetia	o__Actinomycetales	f__Bifidobacteriaceae	g__Bifidobacterium	s__Bifidobacterium_adolescentis
ASV000002	d__Bacteria	p__Firmicutes_A	c__Clostridia	o__Lachnospirales	f__Lachnospiraceae	g__Blautia_A	g(U)_Blautia_A
ASV000003	d__Bacteria	p__Firmicutes	c__Bacilli	o__Lactobacillales	f__Lactobacillaceae	g__Ligilactobacillus	s__Ligilactobacillus_ruminis
ASV000004	d__Bacteria	p__Firmicutes_A	c__Clostridia	o__Peptostreptococcales	f__Peptostreptococcaceae	f(U)_Peptostreptococcaceae	f(U)_Peptostreptococcaceae
ASV000005	d__Bacteria	p__Firmicutes_A	c__Clostridia	o__Lachnospirales	f__Lachnospiraceae	f(U)_Lachnospiraceae	f(U)_Lachnospiraceae
ASV000006	d__Bacteria	p__Proteobacteria	c__Gammaproteobacteria	o__Enterobacterales	f__Enterobacteriaceae	g__Escherichia	g(U)_Escherichia
ASV000007	d__Bacteria	p__Firmicutes_A	c__Clostridia	o__Lachnospirales	f__Lachnospiraceae	g__Anaerobutyricum	g(U)_Anaerobutyricum
ASV000008	d__Bacteria	p__Firmicutes_A	c__Clostridia	o__Clostridiales	f__Clostridiaceae	f(U)_Clostridiaceae	f(U)_Clostridiaceae
ASV000009	d__Bacteria	p__Firmicutes_A	c__Clostridia	o__Lachnospirales	f__Lachnospiraceae	g__Dorea_A	g(U)_Dorea_A
ASV000010	d__Bacteria	p__Firmicutes	c__Bacilli	o__Lactobacillales	f__Streptococcaceae	g__Streptococcus	g(U)_Streptococcus
ASV000011	d__Bacteria	p__Firmicutes	c__Bacilli	o__Erysipelotrichales	f__Coprobacillaceae	g__Catenibacterium	s__Catenibacterium_sp000437715
ASV000012	d__Bacteria	p__Actinobacteriota	c__Actinomycetia	o__Actinomycetales	f__Bifidobacteriaceae	g__Bifidobacterium	s__Bifidobacterium_kashiwanohense
ASV000013	d__Bacteria	p__Firmicutes_A	c__Clostridia	o__Lachnospirales	f__Lachnospiraceae	g__Fusicatenibacter	s__Fusicatenibacter_saccharivorans
ASV000014	d__Bacteria	p__Firmicutes_A	c__Clostridia	o__Lachnospirales	f__Lachnospiraceae	f(U)_Lachnospiraceae	f(U)_Lachnospiraceae
ASV000015	d__Bacteria	p__Firmicutes_A	c__Clostridia	o__Lachnospirales	f__Lachnospiraceae	f(U)_Lachnospiraceae	f(U)_Lachnospiraceae
ASV000016	d__Bacteria	p__Firmicutes_A	c__Clostridia	o__Lachnospirales	f__Lachnospiraceae	f(U)_Lachnospiraceae	f(U)_Lachnospiraceae
ASV000017	d__Bacteria	p__Actinobacteriota	c__Actinomycetia	o__Actinomycetales	f__Bifidobacteriaceae	g__Bifidobacterium	g(U)_Bifidobacterium
ASV000018	d__Bacteria	p__Firmicutes	c__Bacilli	o__Erysipelotrichales	f__Erysipelotrichaceae	g__Holdemanella	g(U)_Holdemanella
ASV000019	d__Bacteria	p__Firmicutes_A	c__Clostridia	o__Oscillospirales	f__Ruminococcaceae	g__Gemmiger	s__Gemmiger_qucibialis
ASV000020	d__Bacteria	p__Firmicutes_A	c__Clostridia	o__Oscillospirales	f__Ruminococcaceae	g__Faecalibacterium	g(U)_Faecalibacterium
ASV000021	d__Bacteria	p__Firmicutes	c__Bacilli	o__Erysipelotrichales	f__Erysipelotrichaceae	g__Holdemanella	s__Holdemanella_biformis
ASV000022	d__Bacteria	p__Firmicutes	c__Bacilli	o__Lactobacillales	f__Streptococcaceae	g__Streptococcus	g(U)_Streptococcus
ASV000023	d__Bacteria	p__Actinobacteriota	c__Coriobacteriia	o__Coriobacteriales	f__Coriobacteriaceae	g__Collinsella	g(U)_Collinsella
ASV000024	d__Bacteria	p__Actinobacteriota	c__Actinomycetia	o__Actinomycetales	f__Bifidobacteriaceae	g__Bifidobacterium	s__Bifidobacterium_bifidum
ASV000025	d__Bacteria	p__Firmicutes	c__Bacilli	o__Lactobacillales	f__Streptococcaceae	g__Streptococcus	s__Streptococcus_thermophilus
ASV000026	d__Bacteria	p__Firmicutes_A	c__Clostridia	o__Lachnospirales	f__Lachnospiraceae	f(U)_Lachnospiraceae	f(U)_Lachnospiraceae
ASV000027	d__Bacteria	p__Firmicutes_A	c__Clostridia	o__Lachnospirales	f__Lachnospiraceae	f(U)_Lachnospiraceae	f(U)_Lachnospiraceae
ASV000028	d__Bacteria	p__Firmicutes_A	c__Clostridia	o__Oscillospirales	f__Ruminococcaceae	g__Faecalibacterium	s__Faecalibacterium_prausnitzii_D
ASV000029	d__Bacteria	p__Firmicutes_A	c__Clostridia	o__Lachnospirales	f__Lachnospiraceae	g__Dorea	s__Dorea_formicigenerans
ASV000030	d__Bacteria	p__Firmicutes	c__Bacilli	o__Erysipelotrichales	f__Coprobacillaceae	g__Catenibacterium	s__Catenibacterium_mitsuokai
ASV000031	d__Bacteria	p__Firmicutes	c__Bacilli	o__Lactobacillales	f__Enterococcaceae	f(U)_Enterococcaceae	f(U)_Enterococcaceae
ASV000032	d__Bacteria	p__Firmicutes_A	c__Clostridia	o__Lachnospirales	f__Lachnospiraceae	f(U)_Lachnospiraceae	f(U)_Lachnospiraceae
ASV000033	d__Bacteria	p__Firmicutes	c__Bacilli	o__Erysipelotrichales	f__Coprobacillaceae	g__Faecalibacillus	s__Faecalibacillus_intestinalis
ASV000034	d__Bacteria	p__Firmicutes	c__Bacilli	o__Lactobacillales	f__Lactobacillaceae	g__Limosilactobacillus	s__Limosilactobacillus_mucosae
ASV000035	d__Bacteria	p__Firmicutes_A	c__Clostridia	o__Lachnospirales	f__Lachnospiraceae	f(U)_Lachnospiraceae	f(U)_Lachnospiraceae
ASV000036	d__Bacteria	p__Verrucomicrobiota	c__Verrucomicrobiae	o__Verrucomicrobiales	f__Akkermansiaceae	g__Akkermansia	s__Akkermansia_glycaniphila
ASV000037	d__Bacteria	p__Firmicutes_A	c__Clostridia	o__UBA1381	f__UBA1381	g__CAG-41	s__CAG-41_sp900066215
ASV000038	d__Bacteria	p__Firmicutes_A	c__Clostridia	o__Oscillospirales	f__Acutalibacteraceae	g__Ruminococcus_E	s__Ruminococcus_E_bromii_B
ASV000039	d__Bacteria	p__Firmicutes_A	c__Clostridia	o__Lachnospirales	f__Lachnospiraceae	g__Blautia_A	g(U)_Blautia_A
ASV000040	d__Bacteria	p__Proteobacteria	c__Gammaproteobacteria	o__Enterobacterales	f__Enterobacteriaceae	g__Escherichia	g(U)_Escherichia
ASV000041	d__Bacteria	p__Firmicutes_A	c__Clostridia	o__Oscillospirales	f__Acutalibacteraceae	g__Ruminococcus_E	s__Ruminococcus_E_bromii_B
ASV000042	d__Bacteria	p__Firmicutes_A	c__Clostridia	o__TANB77	f__CAG-508	g__CAG-492	s__CAG-492_sp900553225
ASV000043	d__Bacteria	p__Firmicutes	c__Bacilli	o__Erysipelotrichales	f__Erysipelotrichaceae	g__Absicoccus	s__Absicoccus_sp000434355
ASV000044	d__Bacteria	p__Firmicutes_A	c__Clostridia	o__Oscillospirales	f__Acutalibacteraceae	g__Ruminococcus_E	s__Ruminococcus_E_bromii_B
ASV000045	d__Bacteria	p__Firmicutes	c__Bacilli	o__Lactobacillales	f__Lactobacillaceae	g__Ligilactobacillus	s__Ligilactobacillus_ruminis
ASV000046	d__Bacteria	p__Firmicutes_C	c__Negativicutes	o__Veillonellales	f__Dialisteraceae	g__Dialister	s__Dialister_hominis
ASV000047	d__Bacteria	p__Firmicutes_A	c__Clostridia	o__Oscillospirales	f__Butyricicoccaceae	g__Agathobaculum	s__Agathobaculum_butyriciproducens
ASV000048	d__Bacteria	p__Firmicutes	c__Bacilli	o__Lactobacillales	f__Lactobacillaceae	g__Weissella	g(U)_Weissella
ASV000049	d__Bacteria	p__Firmicutes_A	c__Clostridia	o__Oscillospirales	f__Acutalibacteraceae	g__UBA1417	s__UBA1417_sp003531055
ASV000050	d__Bacteria	p__Firmicutes_A	c__Clostridia	o__Lachnospirales	f__Lachnospiraceae	f(U)_Lachnospiraceae	f(U)_Lachnospiraceae
ASV000051	d__Bacteria	p__Firmicutes_A	c__Clostridia	o__Lachnospirales	f__Lachnospiraceae	f(U)_Lachnospiraceae	f(U)_Lachnospiraceae
ASV000052	d__Bacteria	p__Firmicutes_A	c__Clostridia	o__Oscillospirales	f__Acutalibacteraceae	g__CAG-217	s__CAG-217_sp000436335
ASV000053	d__Bacteria	p__Proteobacteria	c__Gammaproteobacteria	o__Enterobacterales	f__Enterobacteriaceae	g__Escherichia	g(U)_Escherichia
ASV000054	d__Bacteria	p__Verrucomicrobiota	c__Verrucomicrobiae	o__Verrucomicrobiales	f__Akkermansiaceae	g__Akkermansia	g(U)_Akkermansia
ASV000055	d__Bacteria	p__Firmicutes_A	c__Clostridia	o__Oscillospirales	f__Acutalibacteraceae	g__Fimenecus	s__Fimenecus_sp000432435
ASV000056	d__Bacteria	p__Firmicutes	c__Bacilli	o__Lactobacillales	f__Streptococcaceae	g__Streptococcus	g(U)_Streptococcus
ASV000057	d__Bacteria	p__Bacteroidota	c__Bacteroidia	o__Bacteroidales	f__Bacteroidaceae	g__Bacteroides	s__Bacteroides_fragilis
ASV000058	d__Bacteria	p__Firmicutes	c__Bacilli	o__Lactobacillales	f__Streptococcaceae	g__Streptococcus	g(U)_Streptococcus
ASV000059	d__Bacteria	p__Firmicutes_A	c__Clostridia	o__Lachnospirales	f__Lachnospiraceae	f(U)_Lachnospiraceae	f(U)_Lachnospiraceae
ASV000060	d__Bacteria	p__Firmicutes	c__Bacilli	o__Lactobacillales	f__Streptococcaceae	g__Lactococcus	g(U)_Lactococcus
ASV000061	d__Bacteria	p__Firmicutes_A	c__Clostridia	o__Lachnospirales	f__Lachnospiraceae	f(U)_Lachnospiraceae	f(U)_Lachnospiraceae
ASV000062	d__Bacteria	p__Firmicutes	c__Bacilli	o__Lactobacillales	f__Streptococcaceae	g__Streptococcus	g(U)_Streptococcus
ASV000063	d__Bacteria	p__Firmicutes_A	c__Clostridia	o__Peptostreptococcales	f__Peptostreptococcaceae	f(U)_Peptostreptococcaceae	f(U)_Peptostreptococcaceae
ASV000064	d__Bacteria	p__Firmicutes_A	c__Clostridia	o__Oscillospirales	f__Oscillospiraceae	f(U)_Oscillospiraceae	f(U)_Oscillospiraceae
ASV000065	d__Bacteria	p__Firmicutes_A	c__Clostridia	o__Lachnospirales	f__Lachnospiraceae	g__Coprococcus	g(U)_Coprococcus
ASV000067	d__Bacteria	p__Firmicutes_A	c__Clostridia	o__Oscillospirales	f__Acutalibacteraceae	g__Ruminococcus_E	s__Ruminococcus_E_sp003526955
ASV000068	d__Bacteria	p__Firmicutes_A	c__Clostridia	o__Oscillospirales	f__Oscillospiraceae	f(U)_Oscillospiraceae	f(U)_Oscillospiraceae
ASV000069	d__Bacteria	p__Bacteroidota	c__Bacteroidia	o__Bacteroidales	f__Bacteroidaceae	g__Prevotella	g(U)_Prevotella
ASV000070	d__Bacteria	p__Firmicutes	c__Bacilli	o__Lactobacillales	f__Lactobacillaceae	g__Ligilactobacillus	s__Ligilactobacillus_ruminis
ASV000071	d__Bacteria	p__Firmicutes_A	c__Clostridia	o__Christensenellales	o(U)_Christensenellales	o(U)_Christensenellales	o(U)_Christensenellales
ASV000072	d__Bacteria	p__Firmicutes_A	c__Clostridia	o__Lachnospirales	f__Lachnospiraceae	g__Blautia_A	g(U)_Blautia_A
ASV000073	d__Bacteria	p__Firmicutes_A	c__Clostridia	o__Lachnospirales	f__Lachnospiraceae	g__KLE1615	s__KLE1615_sp900066985
ASV000074	d__Bacteria	p__Firmicutes	c__Bacilli	o__Erysipelotrichales	f__Erysipelotrichaceae	g__Holdemanella	s__Holdemanella_biformis
ASV000075	d__Bacteria	p__Firmicutes_A	c__Clostridia	o__Lachnospirales	f__Lachnospiraceae	g__Anaerobutyricum	g(U)_Anaerobutyricum
ASV000076	d__Bacteria	p__Firmicutes	c__Bacilli	o__Lactobacillales	f__Enterococcaceae	g__Enterococcus	s__Enterococcus_faecalis
ASV000077	d__Bacteria	p__Firmicutes_A	c__Clostridia	o__Oscillospirales	f__Ruminococcaceae	g__Ruminococcus_C	s__Ruminococcus_C_callidus
ASV000078	d__Bacteria	p__Firmicutes_A	c__Clostridia	o__Oscillospirales	f__Acutalibacteraceae	g__Clostridium_A	s__Clostridium_A_leptum
ASV000079	d__Bacteria	p__Firmicutes_C	c__Negativicutes	o__Veillonellales	f__Dialisteraceae	g__Dialister	g(U)_Dialister
ASV000080	d__Bacteria	p__Firmicutes	c__Bacilli	o__Lactobacillales	f__Enterococcaceae	g__Enterococcus_B	g(U)_Enterococcus_B
ASV000081	d__Bacteria	p__Firmicutes_A	c__Clostridia	o__Lachnospirales	f__Lachnospiraceae	g__Blautia_A	g(U)_Blautia_A
ASV000082	d__Bacteria	p__Firmicutes	c__Bacilli	o__Lactobacillales	f__Enterococcaceae	f(U)_Enterococcaceae	f(U)_Enterococcaceae
ASV000083	d__Bacteria	p__Firmicutes	c__Bacilli	o__Lactobacillales	f__Lactobacillaceae	g__Ligilactobacillus	s__Ligilactobacillus_salivarius
ASV000084	d__Bacteria	p__Proteobacteria	c__Gammaproteobacteria	o__Enterobacterales	f__Enterobacteriaceae	f(U)_Enterobacteriaceae	f(U)_Enterobacteriaceae
ASV000085	d__Bacteria	p__Firmicutes	c__Bacilli	o__Lactobacillales	f__Streptococcaceae	g__Lactococcus	s__Lactococcus_cremoris
ASV000086	d__Bacteria	p__Proteobacteria	c__Gammaproteobacteria	o__Enterobacterales	f__Enterobacteriaceae	g__Klebsiella	g(U)_Klebsiella
ASV000087	d__Bacteria	p__Firmicutes	c__Bacilli	o__Lactobacillales	f__Lactobacillaceae	g__Pediococcus	s__Pediococcus_acidilactici
ASV000088	d__Bacteria	p__Firmicutes	c__Bacilli	o__Haloplasmatales_A	f__Turicibacteraceae	g__Turicibacter	s__Turicibacter_sp001543345
ASV000089	d__Bacteria	p__Firmicutes_A	c__Clostridia	o__Oscillospirales	f__Oscillospiraceae	f(U)_Oscillospiraceae	f(U)_Oscillospiraceae
ASV000090	d__Bacteria	p__Actinobacteriota	c__Actinomycetia	o__Actinomycetales	f__Bifidobacteriaceae	g__Bifidobacterium	s__Bifidobacterium_infantis
ASV000091	d__Bacteria	p__Firmicutes_A	c__Clostridia	o__Lachnospirales	f__Lachnospiraceae	g__Lachnospira	g(U)_Lachnospira
ASV000092	d__Bacteria	p__Bacteroidota	c__Bacteroidia	o__Bacteroidales	f__Bacteroidaceae	g__Bacteroides	s__Bacteroides_fragilis
ASV000093	d__Bacteria	p__Firmicutes_A	c__Clostridia	o__Lachnospirales	f__Lachnospiraceae	f(U)_Lachnospiraceae	f(U)_Lachnospiraceae
ASV000094	d__Bacteria	p__Proteobacteria	c__Gammaproteobacteria	o__Burkholderiales	f__Burkholderiaceae	g__Comamonas	s__Comamonas_terrigena
ASV000095	d__Bacteria	p__Bacteroidota	c__Bacteroidia	o__Bacteroidales	f__Bacteroidaceae	g__Prevotella	g(U)_Prevotella
ASV000096	d__Bacteria	p__Bacteroidota	c__Bacteroidia	o__Bacteroidales	f__Bacteroidaceae	g__Bacteroides	s__Bacteroides_caccae
ASV000097	d__Bacteria	p__Firmicutes_A	c__Clostridia	o__Lachnospirales	f__Lachnospiraceae	f(U)_Lachnospiraceae	f(U)_Lachnospiraceae
ASV000098	d__Bacteria	p__Firmicutes_A	c__Clostridia	o__Oscillospirales	f__Ruminococcaceae	g__Ruminococcus_D	g(U)_Ruminococcus_D
ASV000099	d__Bacteria	p__Firmicutes_A	c__Clostridia	o__TANB77	f__CAG-508	g__CAG-273	s__CAG-273_sp003507395
ASV000100	d__Bacteria	p__Bacteroidota	c__Bacteroidia	o__Bacteroidales	f__Bacteroidaceae	g__Phocaeicola	s__Phocaeicola_vulgatus
ASV000101	d__Bacteria	p__Firmicutes_A	c__Clostridia	o__Lachnospirales	f__Lachnospiraceae	g__Sellimonas	s__Sellimonas_intestinalis
ASV000102	d__Bacteria	p__Bacteroidota	c__Bacteroidia	o__Bacteroidales	f__Bacteroidaceae	g__Prevotella	s__Prevotella_copri_A
ASV000103	d__Bacteria	p__Firmicutes_A	c__Clostridia	o__Oscillospirales	f__Ruminococcaceae	f(U)_Ruminococcaceae	f(U)_Ruminococcaceae
ASV000104	d__Bacteria	p__Firmicutes_A	c__Clostridia	o__Oscillospirales	f__Ruminococcaceae	g__Ruthenibacterium	s__Ruthenibacterium_lactatiformans
ASV000105	d__Bacteria	p__Firmicutes_A	c__Clostridia	o__Clostridiales	f__Clostridiaceae	f(U)_Clostridiaceae	f(U)_Clostridiaceae
ASV000106	d__Bacteria	p__Firmicutes_C	c__Negativicutes	o__Veillonellales	f__Dialisteraceae	g__Dialister	s__Dialister_sp900543165
ASV000107	d__Bacteria	p__Firmicutes_A	c__Clostridia	o__Lachnospirales	f__Lachnospiraceae	f(U)_Lachnospiraceae	f(U)_Lachnospiraceae
ASV000108	d__Bacteria	p__Firmicutes_A	c__Clostridia	o__Oscillospirales	f__Oscillospiraceae	g__ER4	s__ER4_sp000765235
ASV000109	d__Bacteria	p__Firmicutes_A	c__Clostridia	o__Lachnospirales	f__Lachnospiraceae	f(U)_Lachnospiraceae	f(U)_Lachnospiraceae
ASV000110	d__Bacteria	p__Proteobacteria	c__Gammaproteobacteria	o__Enterobacterales	f__Enterobacteriaceae	g__Klebsiella	g(U)_Klebsiella
ASV000111	d__Bacteria	p__Firmicutes	c__Bacilli	o__Erysipelotrichales	f__Erysipelotrichaceae	g__Bulleidia	s__Bulleidia_sp900539965
ASV000112	d__Bacteria	p__Firmicutes_A	c__Clostridia	o__Oscillospirales	f__Acutalibacteraceae	g__Eubacterium_R	g(U)_Eubacterium_R
ASV000113	d__Bacteria	p__Firmicutes	c__Bacilli	o__Lactobacillales	f__Enterococcaceae	f(U)_Enterococcaceae	f(U)_Enterococcaceae
ASV000114	d__Bacteria	p__Firmicutes	c__Bacilli	o__Lactobacillales	f__Enterococcaceae	f(U)_Enterococcaceae	f(U)_Enterococcaceae
ASV000115	d__Bacteria	p__Firmicutes	c__Bacilli	o__Lactobacillales	f__Streptococcaceae	g__Streptococcus	s__Streptococcus_mutans
ASV000116	d__Bacteria	p__Actinobacteriota	c__Actinomycetia	o__Actinomycetales	f__Bifidobacteriaceae	g__Bifidobacterium	g(U)_Bifidobacterium
ASV000117	d__Bacteria	p__Firmicutes	c__Bacilli	o__Erysipelotrichales	f__Erysipelotrichaceae	g__Clostridium_AQ	g(U)_Clostridium_AQ
ASV000118	d__Bacteria	p__Firmicutes_A	c__Clostridia	o__Oscillospirales	f__Oscillospiraceae	f(U)_Oscillospiraceae	f(U)_Oscillospiraceae
ASV000119	d__Bacteria	p__Firmicutes_C	c__Negativicutes	o__Veillonellales	f__Megasphaeraceae	g__Megasphaera	s__Megasphaera_sp000417505
ASV000120	d__Bacteria	p__Firmicutes	c__Bacilli	o__Lactobacillales	f__Streptococcaceae	g__Streptococcus	g(U)_Streptococcus
ASV000121	d__Bacteria	p__Firmicutes_A	c__Clostridia	o__Peptostreptococcales	f__Peptostreptococcaceae	f(U)_Peptostreptococcaceae	f(U)_Peptostreptococcaceae
ASV000122	d__Bacteria	p__Firmicutes_A	c__Clostridia	o__Oscillospirales	f__Acutalibacteraceae	g__Ruminococcus_E	s__Ruminococcus_E_sp003526955
ASV000123	d__Bacteria	p__Bacteroidota	c__Bacteroidia	o__Bacteroidales	f__Bacteroidaceae	g__Bacteroides	s__Bacteroides_uniformis
ASV000124	d__Bacteria	p__Bacteroidota	c__Bacteroidia	o__Bacteroidales	f__Bacteroidaceae	g__Phocaeicola	s__Phocaeicola_dorei
ASV000125	d__Bacteria	p__Actinobacteriota	c__Coriobacteriia	o__Coriobacteriales	f__Coriobacteriaceae	g__Collinsella	s__Collinsella_sp003466125
ASV000126	d__Bacteria	p__Proteobacteria	c__Gammaproteobacteria	o__Enterobacterales	f__Enterobacteriaceae	f(U)_Enterobacteriaceae	f(U)_Enterobacteriaceae
ASV000127	d__Bacteria	p__Firmicutes_C	c__Negativicutes	o__Veillonellales	f__Megasphaeraceae	g__Megasphaera	g(U)_Megasphaera
ASV000128	d__Bacteria	p__Firmicutes_C	c__Negativicutes	o__Veillonellales	f__Megasphaeraceae	g__Megasphaera	s__Megasphaera_sp001546855
ASV000129	d__Bacteria	p__Firmicutes_A	c__Clostridia	o__Oscillospirales	f__Oscillospiraceae	g__CAG-83	s__CAG-83_sp001916855
ASV000130	d__Bacteria	p__Firmicutes	c__Bacilli	o__Erysipelotrichales	f__Coprobacillaceae	g__Catenibacterium	s__Catenibacterium_sp000437715
ASV000131	d__Bacteria	p__Firmicutes_A	c__Clostridia	o__Oscillospirales	f__Acutalibacteraceae	g__Pseudoruminococcus_A	s__Pseudoruminococcus_A_massiliensis
ASV000132	d__Bacteria	p__Bacteroidota	c__Bacteroidia	o__Bacteroidales	f__Rikenellaceae	f(U)_Rikenellaceae	f(U)_Rikenellaceae
ASV000133	d__Bacteria	p__Verrucomicrobiota	c__Verrucomicrobiae	o__Verrucomicrobiales	f__Akkermansiaceae	g__Akkermansia	g(U)_Akkermansia
ASV000134	d__Bacteria	p__Firmicutes_A	c__Clostridia	o__Lachnospirales	f__Lachnospiraceae	g__Eubacterium_G	s__Eubacterium_G_sp000434315
ASV000135	d__Bacteria	p__Firmicutes_A	c__Clostridia	o__Christensenellales	f__CAG-138	g__Phil1	s__Phil1_sp002069725
ASV000136	d__Bacteria	p__Firmicutes_A	c__Clostridia	o__Lachnospirales	f__Lachnospiraceae	f(U)_Lachnospiraceae	f(U)_Lachnospiraceae
ASV000137	d__Bacteria	p__Firmicutes_A	c__Clostridia	o__TANB77	f__CAG-508	g__CAG-492	s__CAG-492_sp900553225
ASV000138	d__Bacteria	p__Firmicutes	c__Bacilli	o__Erysipelotrichales	f__Coprobacillaceae	g__Faecalibacillus	s__Faecalibacillus_intestinalis
ASV000139	d__Bacteria	p__Firmicutes_A	c__Clostridia	o__Oscillospirales	f__Acutalibacteraceae	g__Eubacterium_R	g(U)_Eubacterium_R
ASV000140	d__Bacteria	p__Firmicutes_A	c__Clostridia	o__Eubacteriales	f__Eubacteriaceae	g__Eubacterium	g(U)_Eubacterium
ASV000141	d__Bacteria	p__Firmicutes_A	c__Clostridia	o__Oscillospirales	f__Acutalibacteraceae	g__CAG-177	s__CAG-177_sp003538135
ASV000142	d__Bacteria	p__Firmicutes	c__Bacilli	o__Erysipelotrichales	f__Coprobacillaceae	g__Erysipelatoclostridium	s__Erysipelatoclostridium_ramosum
ASV000143	d__Bacteria	p__Firmicutes_A	c__Clostridia	o__Oscillospirales	f__Acutalibacteraceae	g__CAG-177	g(U)_CAG-177
ASV000144	d__Bacteria	p__Actinobacteriota	c__Coriobacteriia	o__Coriobacteriales	f__Eggerthellaceae	g__Senegalimassilia	s__Senegalimassilia_anaerobia
ASV000145	d__Bacteria	p__Firmicutes	c__Bacilli	o__Lactobacillales	f__Lactobacillaceae	g__Limosilactobacillus	s__Limosilactobacillus_mucosae
ASV000146	d__Bacteria	p__Firmicutes_A	c__Clostridia	o__Christensenellales	f__CAG-138	g__RUG472	s__RUG472_sp902768995
ASV000147	d__Bacteria	p__Firmicutes_A	c__Clostridia	o__Lachnospirales	f__Lachnospiraceae	g__CAG-127	s__CAG-127_sp900319515
ASV000148	d__Bacteria	p__Actinobacteriota	c__Coriobacteriia	o__Coriobacteriales	f__Atopobiaceae	g__Parolsenella	s__Parolsenella_catena
ASV000149	d__Bacteria	p__Proteobacteria	c__Gammaproteobacteria	o__Enterobacterales	f__Enterobacteriaceae	g__Klebsiella	g(U)_Klebsiella
ASV000150	d__Bacteria	p__Actinobacteriota	c__Coriobacteriia	o__Coriobacteriales	f__Atopobiaceae	g__Paratractidigestivibacter	s__Paratractidigestivibacter_faecalis
ASV000151	d__Bacteria	p__Firmicutes_A	c__Clostridia	o__Lachnospirales	f__Lachnospiraceae	f(U)_Lachnospiraceae	f(U)_Lachnospiraceae
ASV000152	d__Bacteria	p__Firmicutes_A	c__Clostridia	o__Clostridiales	f__Clostridiaceae	g__Clostridium	g(U)_Clostridium
ASV000153	d__Bacteria	p__Firmicutes_A	c__Clostridia	o__Lachnospirales	f__Lachnospiraceae	f(U)_Lachnospiraceae	f(U)_Lachnospiraceae
ASV000154	d__Bacteria	p__Firmicutes_C	c__Negativicutes	o__Selenomonadales	f__Selenomonadaceae	g__Mitsuokella	s__Mitsuokella_multacida
ASV000155	d__Bacteria	p__Firmicutes_A	c__Clostridia	o__Oscillospirales	f__Oscillospiraceae	f(U)_Oscillospiraceae	f(U)_Oscillospiraceae
ASV000156	d__Bacteria	p__Firmicutes	c__Bacilli	o__Erysipelotrichales	f__Erysipelotrichaceae	g__Faecalitalea	s__Faecalitalea_cylindroides
ASV000157	d__Bacteria	p__Firmicutes	c__Bacilli	o__Haloplasmatales_A	f__Turicibacteraceae	g__Turicibacter	s__Turicibacter_sanguinis
ASV000158	d__Bacteria	p__Firmicutes_A	c__Clostridia	o__Lachnospirales	f__Lachnospiraceae	g__Blautia_A	g(U)_Blautia_A
ASV000159	d__Bacteria	p__Firmicutes_A	c__Clostridia	o__Lachnospirales	f__Lachnospiraceae	g__Blautia_A	g(U)_Blautia_A
ASV000160	d__Bacteria	p__Actinobacteriota	c__Actinomycetia	o__Actinomycetales	f__Bifidobacteriaceae	g__Bifidobacterium	g(U)_Bifidobacterium
ASV000161	d__Bacteria	p__Firmicutes_A	c__Clostridia	o__Christensenellales	f__CAG-138	g__Phil1	s__Phil1_sp002069725
ASV000162	d__Bacteria	p__Bacteroidota	c__Bacteroidia	o__Bacteroidales	f__Tannerellaceae	g__Parabacteroides	s__Parabacteroides_merdae
ASV000163	d__Bacteria	p__Bacteroidota	c__Bacteroidia	o__Bacteroidales	f__UBA932	g__Cryptobacteroides	g(U)_Cryptobacteroides
ASV000164	d__Bacteria	p__Firmicutes	c__Bacilli	o__Lactobacillales	f__Streptococcaceae	g__Streptococcus	g(U)_Streptococcus
ASV000165	d__Bacteria	p__Firmicutes	c__Bacilli	o__Lactobacillales	f__Lactobacillaceae	g__Limosilactobacillus	s__Limosilactobacillus_mucosae
ASV000166	d__Bacteria	p__Firmicutes_A	c__Clostridia	o__Lachnospirales	f__Lachnospiraceae	f(U)_Lachnospiraceae	f(U)_Lachnospiraceae
ASV000167	d__Bacteria	p__Firmicutes_A	c__Clostridia	o__Lachnospirales	f__Lachnospiraceae	g__Dorea_A	g(U)_Dorea_A
ASV000168	d__Bacteria	p__Firmicutes_A	c__Clostridia	o__Peptostreptococcales	f__Peptostreptococcaceae	f(U)_Peptostreptococcaceae	f(U)_Peptostreptococcaceae
ASV000169	d__Bacteria	p__Actinobacteriota	c__Coriobacteriia	o__Coriobacteriales	f__Eggerthellaceae	g__Senegalimassilia	s__Senegalimassilia_anaerobia
ASV000170	d__Bacteria	p__Firmicutes_A	c__Clostridia	o__Oscillospirales	f__Ruminococcaceae	g__Gemmiger	s__Gemmiger_qucibialis
ASV000171	d__Bacteria	p__Firmicutes_A	c__Clostridia	o__Christensenellales	o(U)_Christensenellales	o(U)_Christensenellales	o(U)_Christensenellales
ASV000172	d__Bacteria	p__Firmicutes_A	c__Clostridia	o__Oscillospirales	f__Ruminococcaceae	g__Ruminococcus_D	s__Ruminococcus_D_bicirculans
ASV000173	d__Bacteria	p__Bacteroidota	c__Bacteroidia	o__Bacteroidales	f__Bacteroidaceae	g__Prevotella	g(U)_Prevotella
ASV000174	d__Bacteria	p__Firmicutes_A	c__Clostridia	o__Oscillospirales	f__Ruminococcaceae	g__Ruminococcus_C	s__Ruminococcus_C_callidus
ASV000175	d__Bacteria	p__Bacteroidota	c__Bacteroidia	o__Bacteroidales	f__Barnesiellaceae	g__Barnesiella	s__Barnesiella_intestinihominis
ASV000176	d__Bacteria	p__Firmicutes_A	c__Clostridia	o__Lachnospirales	f__Lachnospiraceae	g__Dorea_A	g(U)_Dorea_A
ASV000177	d__Bacteria	p__Firmicutes_A	c__Clostridia	o__Oscillospirales	f__Ruminococcaceae	g__Ruminococcus_F	s__Ruminococcus_F_champanellensis
ASV000178	d__Bacteria	p__Firmicutes	c__Bacilli	o__Erysipelotrichales	f__Erysipelotrichaceae	g__Holdemanella	g(U)_Holdemanella
ASV000180	d__Bacteria	p__Actinobacteriota	c__Coriobacteriia	o__Coriobacteriales	f__Eggerthellaceae	g__Eggerthella	s__Eggerthella_sinensis
ASV000181	d__Bacteria	p__Firmicutes_A	c__Clostridia	o__Lachnospirales	f__Lachnospiraceae	f(U)_Lachnospiraceae	f(U)_Lachnospiraceae
ASV000182	d__Bacteria	p__Firmicutes_A	c__Clostridia	o__Oscillospirales	f__Ruminococcaceae	g__CAG-353	s__CAG-353_sp900066885
ASV000184	d__Bacteria	p__Firmicutes_C	c__Negativicutes	o__Veillonellales	f__Megasphaeraceae	g__Megasphaera	s__Megasphaera_sp001546855
ASV000185	d__Bacteria	p__Firmicutes_C	c__Negativicutes	o__Veillonellales	f__Megasphaeraceae	g__Megasphaera	s__Megasphaera_sp001546855
ASV000186	d__Bacteria	p__Firmicutes	c__Bacilli	o__Erysipelotrichales	f__Coprobacillaceae	g__Catenibacterium	s__Catenibacterium_sp000437715
ASV000188	d__Bacteria	p__Proteobacteria	c__Gammaproteobacteria	o__Enterobacterales	f__Enterobacteriaceae	g__Escherichia	g(U)_Escherichia
ASV000189	d__Bacteria	p__Actinobacteriota	c__Coriobacteriia	o__Coriobacteriales	f__Eggerthellaceae	g__Senegalimassilia	s__Senegalimassilia_anaerobia
ASV000190	d__Bacteria	p__Firmicutes	c__Bacilli	o__Lactobacillales	f__Enterococcaceae	g__Enterococcus_D	g(U)_Enterococcus_D
ASV000191	d__Bacteria	p__Firmicutes_A	c__Clostridia	o__Peptostreptococcales	f__Anaerovoracaceae	g__CAG-238	s__CAG-238_sp900542245
ASV000192	d__Bacteria	p__Firmicutes_A	c__Clostridia	o__Lachnospirales	f__Lachnospiraceae	g__Anaerobutyricum	g(U)_Anaerobutyricum
ASV000193	d__Bacteria	p__Firmicutes_A	c__Clostridia	o__Oscillospirales	f__Ruminococcaceae	g__Ruminococcus_D	s__Ruminococcus_D_bicirculans
ASV000194	d__Bacteria	p__Firmicutes_C	c__Negativicutes	o__Acidaminococcales	f__Acidaminococcaceae	g__Phascolarctobacterium_A	s__Phascolarctobacterium_A_succinatutens
ASV000195	d__Bacteria	p__Firmicutes_C	c__Negativicutes	o__Selenomonadales	f__Selenomonadaceae	g__Mitsuokella	s__Mitsuokella_multacida
ASV000196	d__Bacteria	p__Firmicutes_A	c__Clostridia	o__Lachnospirales	f__Lachnospiraceae	g__Blautia_A	g(U)_Blautia_A
ASV000197	d__Bacteria	p__Firmicutes	c__Bacilli	o__Erysipelotrichales	f__Coprobacillaceae	g__Catenibacterium	s__Catenibacterium_sp000437715
ASV000198	d__Bacteria	p__Firmicutes_A	c__Clostridia	o__Peptostreptococcales	f__Peptostreptococcaceae	f(U)_Peptostreptococcaceae	f(U)_Peptostreptococcaceae
ASV000199	d__Bacteria	p__Firmicutes_C	c__Negativicutes	o__Selenomonadales	f__Selenomonadaceae	g__Mitsuokella	s__Mitsuokella_sp003458855
ASV000200	d__Bacteria	p__Firmicutes_A	c__Clostridia	o__Lachnospirales	f__Lachnospiraceae	g__Fusicatenibacter	s__Fusicatenibacter_saccharivorans
ASV000201	d__Bacteria	p__Firmicutes	c__Bacilli	o__Erysipelotrichales	f__Erysipelotrichaceae	g__Holdemanella	g(U)_Holdemanella
ASV000202	d__Bacteria	p__Firmicutes_A	c__Clostridia	o__Oscillospirales	f__Ruminococcaceae	g__Faecalibacterium	g(U)_Faecalibacterium

## Sheet: Taxa abundance (MWvsHC)
Taxa Abundance of MW and HC for MicrobiomeAnalyst2
	H33	H34	H35	H36	H37	H38	H39	H40	H41	H42	H43	H44	H45	H46	H47	H48	H49	H50	H51	H52	RAS1	RAS10	RAS11	RAS12	RAS14	RAS15	RAS16	RAS17	RAS18	RAS19	RAS2	RAS20	RAS21	RAS23	RAS25	RAS26	RAS27	RAS28	RAS3	RAS30	RAS31	RAS32	RAS33	RAS35	RAS36	RAS4	RAS5	RAS6	RAS7
f(U)_Clostridiaceae	0.000206821	0.000227503	0.00241981	0.00190275	0.0425844	0.000661827	0.00010341	0.0021923	0.0163389	0.00039296	0.00653554	0.00310231	0.000124093	0.000186139	0.000972058	0.0179727	0.00182002	0.00519121	0.000517052	0.000124093	0.0329052	0.0445699	0.00268867	0.010341	0.0980538	0.0278795	0.0381998	0.231888	0.0105686	0.00475688	0.034415	0.268681	0.018738	0.0463279	0.117847	0.0632045	0.00380551	0.206097	0.276023	0.0135054	0.0533184	0.0797088	0.247937	0.0202478	0.029079	0.022771	0.422204	0.0484995	0.0162768
f(U)_Enterobacteriaceae	4.343240e-04	5.501437e-03	4.343240e-04	5.377345e-04	1.592521e-03	0.000000e+00	0.000000e+00	4.715518e-03	0.000000e+00	1.365018e-03	0.000000e+00	2.481851e-04	0.000000e+00	0.000000e+00	5.790987e-04	6.618271e-04	0.000000e+00	1.034105e-03	1.530475e-03	6.825092e-03	1.240926e-04	2.068210e-04	4.756882e-04	0.000000e+00	9.513764e-04	1.654568e-04	1.654568e-04	9.927406e-04	0.000000e+00	0.000000e+00	7.238733e-04	1.695932e-03	0.000000e+00	0.000000e+00	0.000000e+00	0.000000e+00	2.957540e-03	0.000000e+00	6.618271e-04	0.000000e+00	1.240926e-04	2.068210e-04	0.000000e+00	0.000000e+00	0.000000e+00	0.000000e+00	0.000000e+00	0.000000e+00	0.000000e+00
f(U)_Enterococcaceae	0	0	0	0	0.0113338	0	0	0	0	0.000310231	0	0	0	0.0055428	0	0	0	0	0	0	0	0.00113752	0	0.000517052	0	0	0.00039296	0	0	0.00101342	0	0.000827284	0	0	0.000537734	0	0	0	0.00155116	0	0	0	0	0	0	0	0	0.0010341	0
f(U)_Lachnospiraceae	0.253583	0.158942	0.155674	0.364584	0.0794192	0.134971	0.0284999	0.175798	0.0765444	0.0797708	0.174205	0.187731	0.136791	0.093421	0.0889951	0.19983	0.161486	0.32928	0.280429	0.0559658	0.0732973	0.130235	0.0655209	0.17981	0.298215	0.0596058	0.14736	0.146739	0.115013	0.203905	0.075138	0.158218	0.209034	0.104734	0.106513	0.0661827	0.168166	0.0377655	0.172654	0.0416744	0.0971645	0.0597506	0.107898	0.0963372	0.162747	0.0324502	0.055883	0.0548903	0.176997
f(U)_Oscillospiraceae	7.031912e-04	0.000000e+00	6.411450e-04	4.136419e-04	6.680317e-03	0.000000e+00	6.204629e-05	1.447747e-04	9.699903e-03	6.411450e-04	9.306943e-03	2.792083e-03	3.855143e-02	1.054787e-03	0.000000e+00	3.474592e-03	6.535542e-03	0.000000e+00	1.034105e-04	0.000000e+00	3.247089e-03	8.562388e-03	2.192302e-03	8.169428e-03	1.096151e-03	6.763045e-03	3.453910e-03	3.433228e-03	8.086699e-03	4.136419e-05	3.598685e-03	1.261608e-03	1.178879e-03	7.859196e-04	1.116833e-03	2.812765e-03	2.109574e-03	1.793138e-02	1.261608e-03	2.564580e-03	9.513764e-04	4.963703e-04	2.920312e-02	8.748526e-03	1.220244e-03	1.034105e-03	4.680358e-02	8.128064e-03	4.529379e-03
f(U)_Peptostreptococcaceae	0.0178693	0.0108374	0.00626668	0.0829559	0.0632665	0.0338773	0.198217	0.0235983	0.0533184	0.0691609	0.00678373	0.020951	0.00262663	0.0542905	0.151951	0.0935658	0.0749312	0.047424	0.00682509	0.00192344	0.119543	0.0213646	0.0404128	0.00566689	0.0109615	0.0684991	0.0389237	0.0904635	0.0344564	0.0404335	0.111787	0.0911253	0.107816	0.0455833	0.169159	0.063887	0.0267833	0.0425431	0.0445079	0.245062	0.14039	0.0139811	0.0781576	0.095241	0.0210751	0.0517673	0.182499	0.0695332	0.03487
f(U)_Rikenellaceae	0.000000e+00	0.000000e+00	2.068210e-05	0.000000e+00	0.000000e+00	3.102314e-04	0.000000e+00	0.000000e+00	0.000000e+00	0.000000e+00	2.026845e-03	1.034105e-04	1.654568e-03	1.034105e-04	0.000000e+00	0.000000e+00	1.447747e-04	0.000000e+00	2.068210e-05	0.000000e+00	4.136419e-04	4.136419e-05	1.302972e-03	3.412546e-03	4.136419e-05	9.720585e-04	6.204629e-05	0.000000e+00	7.445554e-04	1.034105e-04	1.861389e-04	0.000000e+00	0.000000e+00	6.204629e-05	0.000000e+00	0.000000e+00	0.000000e+00	0.000000e+00	2.481851e-04	8.272838e-05	0.000000e+00	0.000000e+00	3.309135e-04	2.688672e-04	0.000000e+00	4.756882e-04	0.000000e+00	2.275031e-04	0.000000e+00
f(U)_Ruminococcaceae	0.000000e+00	0.000000e+00	0.000000e+00	0.000000e+00	0.000000e+00	0.000000e+00	0.000000e+00	0.000000e+00	1.695932e-03	0.000000e+00	1.220244e-03	0.000000e+00	0.000000e+00	0.000000e+00	0.000000e+00	0.000000e+00	0.000000e+00	0.000000e+00	8.272838e-05	0.000000e+00	0.000000e+00	6.432132e-03	0.000000e+00	3.640049e-03	1.240926e-04	0.000000e+00	0.000000e+00	0.000000e+00	3.102314e-04	0.000000e+00	0.000000e+00	0.000000e+00	1.571839e-03	4.136419e-05	1.654568e-04	2.171620e-03	0.000000e+00	0.000000e+00	0.000000e+00	2.688672e-03	6.204629e-05	9.306943e-04	1.799342e-03	3.970962e-03	3.722777e-04	3.019586e-03	0.000000e+00	0.000000e+00	0.000000e+00
g(U)_Akkermansia	0.000000e+00	4.136419e-05	2.068210e-05	7.611011e-03	5.025749e-03	0.000000e+00	0.000000e+00	0.000000e+00	0.000000e+00	0.000000e+00	0.000000e+00	1.034105e-04	1.489111e-03	0.000000e+00	1.654568e-04	8.272838e-05	0.000000e+00	1.240926e-04	2.481851e-04	1.861389e-04	0.000000e+00	2.068210e-04	3.309135e-04	9.782631e-03	1.861389e-04	0.000000e+00	0.000000e+00	0.000000e+00	0.000000e+00	0.000000e+00	3.575934e-02	4.136419e-05	0.000000e+00	4.136419e-05	0.000000e+00	2.068210e-05	0.000000e+00	0.000000e+00	1.861389e-04	1.447747e-04	2.068210e-05	1.447747e-04	0.000000e+00	0.000000e+00	0.000000e+00	1.654568e-04	1.861389e-04	4.136419e-05	5.790987e-04
g(U)_Anaerobutyricum	0.0019648	0.0940208	0.0604331	0.0681475	0.0992947	0.0595024	0.000765238	0.00105479	0.0167318	0.0646315	0.0356353	0.0610122	0.00754896	0.0109201	0.059399	0.0353871	0.111601	0.0329466	0.00206821	0.0488097	0.00711464	0.0483547	0.0999566	0.0415503	0.01425	0.0137536	0.0195446	0.0255217	0.0150566	0.0387789	0.00105479	0.0235569	0.0444872	0.00852102	0.0266179	0.0493888	0.0331948	0.00732146	0.0247978	0.0157391	0.0529668	0.0253149	0.048665	0.0291411	0.023226	0.0447561	0.0152013	0.0127815	0.0544973
g(U)_Bifidobacterium	4.285330e-02	6.004012e-02	2.603876e-02	2.969949e-02	2.357759e-03	2.417737e-02	7.306984e-02	6.851978e-02	1.772456e-02	1.265744e-02	3.921325e-02	4.012327e-03	1.342268e-02	1.353023e-01	2.018573e-02	5.149842e-03	2.326736e-02	1.265744e-02	5.997808e-04	4.425968e-03	3.309135e-04	1.240926e-04	4.136419e-05	1.447747e-04	3.102314e-04	1.654568e-04	1.261608e-03	1.551157e-03	6.721681e-03	3.439432e-02	2.585262e-03	6.411450e-04	5.790987e-04	1.282290e-03	5.584166e-04	1.652499e-02	2.068210e-04	9.720585e-04	9.513764e-04	7.735104e-03	4.260512e-03	1.305040e-02	4.363922e-03	1.178879e-03	7.259416e-03	2.916175e-03	1.861389e-04	2.543898e-03	2.275031e-04
g(U)_Blautia_A	0.148746	0.42359	0.0968543	0.107485	0.266799	0.190565	0.176211	0.135261	0.0667618	0.096089	0.131931	0.230626	0.0127815	0.124403	0.0705053	0.0796468	0.10674	0.223656	0.449732	0.419392	0.0850241	0.257616	0.114537	0.143182	0.175053	0.0810325	0.0966061	0.142769	0.0881471	0.13795	0.00448801	0.151414	0.184381	0.15433	0.206531	0.130401	0.245579	0.0547041	0.234514	0.053153	0.333478	0.142417	0.0761101	0.0501541	0.0626874	0.134992	0.0299477	0.0385307	0.103452
g(U)_Clostridium_AQ	1.654568e-04	2.068210e-04	4.136419e-05	0.000000e+00	0.000000e+00	2.068210e-05	9.100122e-04	4.136419e-04	1.240926e-04	0.000000e+00	0.000000e+00	2.481851e-04	0.000000e+00	1.034105e-04	0.000000e+00	0.000000e+00	3.722777e-04	4.136419e-04	5.480755e-03	2.068210e-05	1.102356e-02	2.895493e-04	0.000000e+00	1.013423e-03	0.000000e+00	5.108478e-03	0.000000e+00	4.136419e-05	8.272838e-05	0.000000e+00	2.068210e-04	2.068210e-05	8.272838e-05	0.000000e+00	5.584166e-04	0.000000e+00	0.000000e+00	0.000000e+00	1.034105e-04	0.000000e+00	1.034105e-04	1.240926e-04	4.136419e-05	0.000000e+00	0.000000e+00	2.481851e-03	0.000000e+00	1.054787e-03	1.861389e-04
g(U)_Collinsella	1.427065e-03	1.333995e-02	1.282290e-02	1.458088e-02	1.536680e-02	2.463238e-02	1.178879e-03	1.013630e-01	1.098012e-01	2.589398e-02	7.060867e-02	7.782673e-02	8.645116e-03	6.789932e-02	1.406382e-03	2.401191e-02	8.128064e-03	8.893301e-04	1.751773e-02	6.556224e-03	1.664909e-02	0.000000e+00	8.272838e-05	2.688672e-04	2.068210e-05	4.136419e-04	1.116833e-03	2.190234e-02	5.046431e-03	3.495274e-03	2.275031e-04	1.737296e-03	1.619408e-02	2.605944e-03	4.692767e-02	7.437282e-02	3.143679e-02	1.201630e-02	7.342144e-03	8.893301e-04	2.771401e-03	2.605944e-03	4.136419e-04	8.107381e-03	5.304957e-02	3.515956e-04	1.861389e-04	2.068210e-03	9.224215e-03
g(U)_Coprococcus	0	0	0.000206821	0	0	0	0	0	0.00188207	0	0.00469484	0	0	0	0	0.000455006	0	0	0	0	0.0011582	0.00308163	0	0.04821	0.00105479	0.000579099	0.000455006	0	0.00591508	0	0	0	0.000910012	0	0.000372278	0	0	0	0	0	0.000165457	0	0.00517052	0	0.00039296	0.0047362	0.00262663	0	0.00122024
g(U)_Dialister	0.000000e+00	0.000000e+00	0.000000e+00	0.000000e+00	0.000000e+00	0.000000e+00	0.000000e+00	0.000000e+00	0.000000e+00	0.000000e+00	6.514860e-03	0.000000e+00	0.000000e+00	0.000000e+00	0.000000e+00	0.000000e+00	0.000000e+00	0.000000e+00	0.000000e+00	0.000000e+00	1.447747e-04	2.068210e-05	1.240926e-04	6.204629e-05	8.272838e-05	0.000000e+00	1.242994e-02	2.564580e-03	0.000000e+00	0.000000e+00	0.000000e+00	2.688672e-04	0.000000e+00	1.240926e-04	2.275031e-04	7.031912e-04	4.136419e-05	7.879878e-03	1.034105e-04	1.495316e-02	6.204629e-05	8.272838e-05	1.034105e-04	1.654568e-04	6.742363e-03	0.000000e+00	2.620422e-02	1.902753e-03	1.447747e-04
g(U)_Dorea_A	0.0697607	0.0423569	0.0277967	0.0324916	0.0338566	0.0637629	0.00165457	0.00783851	0.0447147	0.0498852	0.0547869	0.0205166	0.00862443	0.0940415	0.00167525	0.037538	0.0185518	0.00169593	0.000868648	0.0283965	0.0161527	0.06883	0.0124713	0.00341255	0.0242394	0.0177452	0.0144568	0.0184691	0.0214887	0.0650245	0.0569999	0.0209303	0.0262869	0.0126161	0.0371244	0.0653761	0.0187173	0.0117681	0.0175177	0.01971	0.0392753	0.0239085	0.0379103	0.0188414	0.0137122	0.000868648	0.00508779	0.00192344	0.0264938
g(U)_Enterococcus_B	4.963703e-04	7.859196e-04	2.275031e-04	2.688672e-04	1.482906e-02	0.000000e+00	0.000000e+00	4.550061e-04	6.101218e-03	8.066017e-04	4.136419e-05	8.272838e-05	0.000000e+00	9.720585e-04	0.000000e+00	0.000000e+00	1.654568e-04	1.034105e-03	1.240926e-04	0.000000e+00	4.136419e-04	7.693740e-03	3.102314e-04	0.000000e+00	9.782631e-03	2.895493e-04	0.000000e+00	7.445554e-04	3.309135e-04	3.515956e-04	1.344336e-03	1.385700e-03	5.997808e-04	2.068210e-04	1.799342e-03	0.000000e+00	1.410519e-02	3.515956e-04	3.660731e-03	0.000000e+00	1.654568e-04	1.319518e-02	2.068210e-04	0.000000e+00	0.000000e+00	0.000000e+00	1.013423e-03	0.000000e+00	5.997808e-04
g(U)_Escherichia	0.00455006	0.00769374	0.00630804	0.00457074	0.126574	0.00128229	0.00119956	0.00833488	0.00812806	0.198817	0.00403301	0.00088933	0.0906496	0.0176005	0.00136502	0.000579099	0.00839693	0.114413	0.00905876	0.000806602	0.478687	0.0174764	0.00289549	0.0100515	0.00326777	0.597981	0.00775579	0.0124299	0.174929	0.00500507	0.453579	0.0342082	0.00186139	0.00314368	0.0516225	0.00535666	0.00144775	0.373622	0.021468	0.00171661	0.00326777	0.0123265	0.00862443	0.106782	0.000475688	0.147381	0.00787988	0.533226	0.301504
g(U)_Eubacterium	0.000000e+00	0.000000e+00	0.000000e+00	0.000000e+00	1.820024e-03	0.000000e+00	0.000000e+00	2.481851e-03	0.000000e+00	0.000000e+00	2.688672e-04	4.550061e-04	0.000000e+00	7.238733e-04	1.034105e-04	0.000000e+00	1.447747e-04	0.000000e+00	0.000000e+00	0.000000e+00	1.406382e-03	2.068210e-05	0.000000e+00	0.000000e+00	0.000000e+00	6.204629e-04	0.000000e+00	0.000000e+00	2.688672e-04	1.282290e-03	9.782631e-03	0.000000e+00	0.000000e+00	0.000000e+00	0.000000e+00	0.000000e+00	0.000000e+00	6.411450e-04	1.861389e-04	0.000000e+00	0.000000e+00	0.000000e+00	5.584166e-04	0.000000e+00	0.000000e+00	0.000000e+00	8.272838e-05	1.737296e-03	0.000000e+00
g(U)_Eubacterium_R	0.000000e+00	0.000000e+00	4.136419e-04	0.000000e+00	0.000000e+00	0.000000e+00	0.000000e+00	0.000000e+00	1.716614e-03	2.543898e-03	0.000000e+00	6.204629e-05	5.790987e-04	0.000000e+00	0.000000e+00	0.000000e+00	0.000000e+00	0.000000e+00	0.000000e+00	0.000000e+00	0.000000e+00	1.654568e-04	4.798246e-03	1.071333e-02	0.000000e+00	0.000000e+00	2.688672e-04	0.000000e+00	0.000000e+00	0.000000e+00	0.000000e+00	0.000000e+00	0.000000e+00	0.000000e+00	3.929598e-04	2.523216e-03	1.282290e-03	0.000000e+00	1.034105e-04	0.000000e+00	1.799342e-03	2.688672e-04	0.000000e+00	0.000000e+00	1.778660e-03	0.000000e+00	0.000000e+00	2.481851e-04	0.000000e+00
g(U)_Faecalibacterium	0.000268867	0.000641145	0.0370623	0.00144775	0.00157184	0.00206821	0.000289549	0.000268867	0.00494302	0.0123886	0.0385101	0.00514984	0.0453558	0.0011582	0.00150979	0.00742487	0.00378482	0.0392753	0.000930694	0.000165457	0.00678373	0.00237844	0.0578478	0.141403	0.0174557	0.00910012	0.0468036	0.0114579	0.0265765	0.00194412	0.00308163	0.00432256	0.0011582	0.00244049	0.00128229	0.00109615	0.0113545	0.0176418	0.00217162	0.0247358	0.00279208	0.0151186	0.0146222	0.0363178	0.00699055	0.0218817	0.0202478	0.0221712	0.0122645
g(U)_Holdemanella	4.756882e-04	9.306943e-04	1.674836e-01	2.481851e-04	1.005357e-01	6.204629e-04	0.000000e+00	3.309135e-04	4.550061e-04	4.279126e-02	2.266758e-02	4.136419e-05	8.165291e-02	5.584166e-04	0.000000e+00	4.183988e-02	2.895493e-04	7.238733e-04	3.929598e-04	6.204629e-05	2.345350e-02	4.446651e-02	3.859279e-02	3.205725e-03	8.976029e-03	1.464292e-02	4.756882e-04	5.962648e-02	1.757978e-03	4.963703e-04	2.068210e-04	6.399040e-02	2.517011e-02	7.031912e-04	1.034105e-03	3.019586e-03	3.389795e-02	4.481810e-02	9.720585e-04	5.598643e-02	7.267688e-02	6.618271e-04	4.963703e-04	1.034105e-03	2.769333e-02	7.652375e-04	5.929557e-02	3.102314e-04	0.000000e+00
g(U)_Klebsiella	3.102314e-04	2.585262e-03	7.238733e-04	3.309135e-04	2.316395e-03	3.722777e-04	8.272838e-05	4.860292e-03	8.479659e-04	2.854129e-03	0.000000e+00	5.377345e-04	4.963703e-04	0.000000e+00	0.000000e+00	3.309135e-04	2.895493e-04	4.053691e-03	2.647308e-03	1.480838e-02	8.272838e-05	0.000000e+00	2.481851e-04	0.000000e+00	3.722777e-04	1.240926e-04	1.034105e-04	4.550061e-04	4.136419e-05	0.000000e+00	6.618271e-04	7.238733e-04	1.447747e-04	0.000000e+00	1.447747e-04	0.000000e+00	2.440487e-03	2.481851e-04	3.929598e-04	0.000000e+00	4.136419e-05	0.000000e+00	0.000000e+00	0.000000e+00	0.000000e+00	0.000000e+00	1.861389e-04	0.000000e+00	3.515956e-04
g(U)_Lachnospira	0.000000e+00	0.000000e+00	2.895493e-04	8.272838e-05	5.997808e-04	0.000000e+00	0.000000e+00	0.000000e+00	0.000000e+00	1.861389e-04	7.859196e-04	0.000000e+00	0.000000e+00	0.000000e+00	0.000000e+00	1.447747e-04	0.000000e+00	0.000000e+00	0.000000e+00	0.000000e+00	2.233666e-03	1.406382e-03	9.927406e-04	4.550061e-03	2.688672e-04	2.026845e-03	1.385700e-03	0.000000e+00	1.365018e-03	1.240926e-04	1.861389e-04	0.000000e+00	2.688672e-04	1.240926e-04	1.261608e-03	1.137515e-03	4.343240e-04	1.803479e-02	7.445554e-04	9.720585e-04	3.929598e-04	1.654568e-04	8.893301e-04	3.908916e-03	1.158197e-03	2.605944e-03	3.929598e-04	4.136419e-04	0.000000e+00
g(U)_Lactococcus	2.047527e-03	7.735104e-03	8.893301e-04	6.411450e-04	2.055800e-02	5.790987e-04	4.136419e-05	2.068210e-04	6.204629e-04	1.654568e-04	3.102314e-04	1.447747e-04	5.170524e-04	3.722777e-04	0.000000e+00	6.204629e-05	3.102314e-04	0.000000e+00	4.095055e-03	0.000000e+00	0.000000e+00	0.000000e+00	0.000000e+00	6.204629e-05	0.000000e+00	0.000000e+00	0.000000e+00	0.000000e+00	0.000000e+00	6.204629e-05	6.204629e-05	0.000000e+00	0.000000e+00	0.000000e+00	0.000000e+00	0.000000e+00	1.116833e-03	1.034105e-04	0.000000e+00	4.136419e-05	0.000000e+00	4.136419e-05	0.000000e+00	0.000000e+00	0.000000e+00	0.000000e+00	0.000000e+00	0.000000e+00	0.000000e+00
g(U)_Megasphaera	4.756882e-04	0.000000e+00	0.000000e+00	6.204629e-05	0.000000e+00	0.000000e+00	0.000000e+00	0.000000e+00	2.419805e-03	6.204629e-05	0.000000e+00	2.068210e-05	0.000000e+00	0.000000e+00	0.000000e+00	2.275031e-04	0.000000e+00	0.000000e+00	0.000000e+00	0.000000e+00	0.000000e+00	0.000000e+00	2.068210e-05	0.000000e+00	2.068210e-05	0.000000e+00	0.000000e+00	0.000000e+00	4.260512e-03	0.000000e+00	0.000000e+00	0.000000e+00	2.068210e-05	0.000000e+00	0.000000e+00	0.000000e+00	0.000000e+00	1.447747e-04	0.000000e+00	4.136419e-05	0.000000e+00	0.000000e+00	0.000000e+00	0.000000e+00	0.000000e+00	0.000000e+00	1.654568e-04	0.000000e+00	0.000000e+00
g(U)_Prevotella	0.000000e+00	0.000000e+00	8.624434e-03	0.000000e+00	0.000000e+00	5.584166e-04	0.000000e+00	0.000000e+00	2.068210e-04	0.000000e+00	2.275031e-04	0.000000e+00	0.000000e+00	0.000000e+00	0.000000e+00	2.688672e-04	0.000000e+00	0.000000e+00	0.000000e+00	0.000000e+00	6.204629e-04	7.238733e-04	4.343240e-04	6.866456e-03	2.461169e-03	2.275031e-04	1.720750e-02	1.240926e-03	1.323654e-03	0.000000e+00	5.584166e-04	2.688672e-04	1.861389e-04	0.000000e+00	6.204629e-05	8.272838e-05	5.377345e-04	3.929598e-04	1.654568e-04	3.329817e-03	4.756882e-04	0.000000e+00	5.584166e-04	6.204629e-04	2.212984e-03	1.168538e-02	1.820024e-03	1.654568e-04	3.662799e-02
g(U)_Ruminococcus_D	0.000000e+00	0.000000e+00	0.000000e+00	0.000000e+00	4.136419e-05	0.000000e+00	6.204629e-05	0.000000e+00	0.000000e+00	1.861389e-04	1.240926e-04	3.309135e-04	5.553143e-02	6.204629e-05	0.000000e+00	0.000000e+00	0.000000e+00	0.000000e+00	0.000000e+00	0.000000e+00	0.000000e+00	2.275031e-04	0.000000e+00	0.000000e+00	0.000000e+00	0.000000e+00	0.000000e+00	0.000000e+00	0.000000e+00	0.000000e+00	0.000000e+00	0.000000e+00	0.000000e+00	0.000000e+00	0.000000e+00	2.068210e-05	0.000000e+00	0.000000e+00	2.109574e-03	6.204629e-05	0.000000e+00	0.000000e+00	0.000000e+00	1.015491e-02	3.515956e-04	4.363922e-03	0.000000e+00	0.000000e+00	0.000000e+00
g(U)_Streptococcus	0.0207235	0.00550144	0.00411574	0.0893467	0.00190275	0.0147877	0.192571	0.00976195	0.0190689	0.0141466	0.0129677	0.0192757	0.0140018	0.00618395	0.00705259	0.00481893	0.0075076	0.0145188	0.0137743	0.115861	0.00175798	0.0033505	0.0831627	0.00198548	0.0172282	0.00250253	0.0971438	0.00684577	0.00965854	0.0516639	0.0433497	0.00622531	0.00440529	0.48121	0.00881057	0.00256458	0.23803	0.00109615	0.00395028	0.039358	0.0387996	0.0399992	0.00252322	0.00802465	0.0222746	0.0027714	0.00188207	0.0209716	0.00177866
g(U)_Weissella	6.204629e-04	8.686480e-03	1.766251e-02	2.641104e-02	2.254348e-03	1.575976e-02	1.654568e-04	2.047527e-03	1.240926e-04	3.950280e-03	8.272838e-05	2.275031e-04	1.137515e-03	9.699903e-03	2.068210e-05	0.000000e+00	1.509793e-03	2.481851e-04	2.481851e-03	6.204629e-04	1.034105e-04	7.445554e-04	9.513764e-04	8.272838e-05	5.211888e-03	3.515956e-04	1.882071e-03	1.861389e-04	2.068210e-04	1.158197e-03	1.654568e-04	2.481851e-04	1.240926e-04	6.204629e-05	2.481851e-04	0.000000e+00	5.832351e-03	0.000000e+00	0.000000e+00	0.000000e+00	6.204629e-04	4.343240e-04	2.481851e-04	2.275031e-04	5.377345e-04	1.034105e-04	0.000000e+00	6.411450e-04	0.000000e+00
o(U)_Christensenellales	0.000000e+00	0.000000e+00	3.102314e-04	2.874811e-03	6.204629e-04	1.633886e-03	2.068210e-05	2.068210e-05	2.688672e-04	8.893301e-04	5.377345e-03	1.323654e-03	4.674154e-03	0.000000e+00	0.000000e+00	7.445554e-04	0.000000e+00	0.000000e+00	0.000000e+00	4.136419e-05	1.199562e-03	0.000000e+00	2.688672e-04	0.000000e+00	2.068210e-04	6.825092e-04	1.882071e-03	2.150938e-03	1.013423e-03	2.688672e-04	2.233666e-03	8.686480e-04	1.654568e-03	2.688672e-04	8.686480e-04	3.681413e-03	2.337077e-03	1.923435e-03	1.240926e-04	1.799342e-03	1.716614e-03	0.000000e+00	7.673057e-03	2.605944e-03	7.652375e-04	0.000000e+00	1.400178e-02	1.344336e-03	6.411450e-04
Others	0.000000e+00	0.000000e+00	0.000000e+00	0.000000e+00	0.000000e+00	0.000000e+00	0.000000e+00	0.000000e+00	2.895493e-04	0.000000e+00	2.212984e-03	0.000000e+00	1.654568e-04	0.000000e+00	0.000000e+00	0.000000e+00	2.895493e-04	0.000000e+00	0.000000e+00	0.000000e+00	2.275031e-04	2.481851e-04	1.323654e-03	5.542802e-03	2.068210e-04	3.102314e-04	1.447747e-04	2.275031e-04	7.445554e-04	0.000000e+00	8.686480e-04	2.275031e-04	1.034105e-04	2.068210e-05	0.000000e+00	0.000000e+00	2.688672e-04	0.000000e+00	0.000000e+00	0.000000e+00	4.343240e-04	6.411450e-04	4.963703e-04	0.000000e+00	0.000000e+00	4.674154e-03	0.000000e+00	0.000000e+00	0.000000e+00
s__Absicoccus_sp000434355	0.000000e+00	0.000000e+00	2.068210e-05	4.136419e-05	6.204629e-05	0.000000e+00	0.000000e+00	1.034105e-04	0.000000e+00	0.000000e+00	2.688672e-04	0.000000e+00	1.034105e-04	0.000000e+00	8.272838e-05	4.374263e-02	0.000000e+00	0.000000e+00	5.584166e-04	8.396931e-03	3.846870e-03	3.058882e-02	1.447747e-04	2.895493e-04	6.204629e-05	1.737296e-03	0.000000e+00	1.633886e-03	0.000000e+00	4.136419e-05	4.136419e-05	1.613203e-03	8.272838e-05	0.000000e+00	0.000000e+00	0.000000e+00	0.000000e+00	7.652375e-04	6.204629e-05	2.636967e-02	1.654568e-04	2.068210e-05	4.136419e-05	0.000000e+00	0.000000e+00	2.068210e-05	0.000000e+00	0.000000e+00	0.000000e+00
s__Agathobaculum_butyriciproducens	0.00326777	0.00246117	0.00088933	0.00215094	0.00440529	0.00699055	0.00109615	0.000765238	0.000765238	0.00250253	0.00210957	0.000992741	0.000372278	0.00376414	0	0.00471552	0.00322641	0.00630804	0	0	0.000310231	0.000599781	0.000868648	0.000661827	0.00175798	0.00049637	0.00341255	0.00308163	0.00113752	0.00136502	0	0.00256458	0.00159252	0.000455006	0.000248185	0.000372278	0.00421915	0.000227503	0.00078592	0.000537734	0	0.00142706	0.000827284	0.00347459	0.00237844	0	0.000372278	0.000351596	0.00204753
s__Bacteroides_caccae	0.000000e+00	0.000000e+00	0.000000e+00	0.000000e+00	0.000000e+00	0.000000e+00	0.000000e+00	0.000000e+00	1.737296e-03	0.000000e+00	6.825092e-04	1.034105e-04	2.998904e-03	0.000000e+00	0.000000e+00	0.000000e+00	0.000000e+00	0.000000e+00	0.000000e+00	0.000000e+00	5.377345e-04	0.000000e+00	2.275031e-04	9.100122e-04	1.447747e-04	1.075469e-03	2.068210e-04	1.034105e-04	9.699903e-03	2.068210e-05	0.000000e+00	0.000000e+00	0.000000e+00	1.861389e-04	1.406382e-03	8.272838e-05	0.000000e+00	2.481851e-04	0.000000e+00	0.000000e+00	0.000000e+00	2.605944e-03	1.013423e-03	8.334884e-03	0.000000e+00	0.000000e+00	1.447747e-04	1.410519e-02	0.000000e+00
s__Bacteroides_fragilis	0.000000e+00	0.000000e+00	0.000000e+00	0.000000e+00	0.000000e+00	0.000000e+00	0.000000e+00	0.000000e+00	2.068210e-05	0.000000e+00	0.000000e+00	0.000000e+00	0.000000e+00	0.000000e+00	0.000000e+00	0.000000e+00	0.000000e+00	0.000000e+00	0.000000e+00	0.000000e+00	0.000000e+00	0.000000e+00	0.000000e+00	2.275031e-04	8.272838e-05	0.000000e+00	0.000000e+00	7.859196e-04	0.000000e+00	0.000000e+00	1.240926e-04	1.447747e-04	1.034105e-04	0.000000e+00	0.000000e+00	0.000000e+00	0.000000e+00	3.681413e-03	1.447747e-04	0.000000e+00	2.068210e-04	0.000000e+00	1.447747e-03	0.000000e+00	1.985481e-03	1.116833e-01	6.204629e-05	1.240926e-04	1.034105e-04
s__Bacteroides_uniformis	0.000000e+00	0.000000e+00	0.000000e+00	0.000000e+00	1.034105e-04	1.240926e-04	0.000000e+00	0.000000e+00	0.000000e+00	0.000000e+00	1.654568e-04	0.000000e+00	1.737296e-03	0.000000e+00	0.000000e+00	0.000000e+00	8.272838e-05	0.000000e+00	0.000000e+00	0.000000e+00	7.031912e-04	8.272838e-05	2.481851e-04	5.687576e-03	1.240926e-04	1.116833e-03	2.068210e-04	2.895493e-04	4.343240e-04	2.068210e-05	2.150938e-03	3.102314e-04	0.000000e+00	0.000000e+00	0.000000e+00	0.000000e+00	1.509793e-03	0.000000e+00	5.790987e-04	2.275031e-04	4.136419e-05	3.309135e-04	5.377345e-04	1.985481e-03	1.654568e-04	9.038076e-03	0.000000e+00	3.309135e-04	0.000000e+00
s__Bifidobacterium_adolescentis	0.00419847	0.00306095	0.00153048	0.023619	0.00332982	0.171579	0.0029989	0.00440529	0.387665	0.192716	0.00330913	0.132448	0.00953445	0.00457074	0.434055	0.182561	0.341627	0.0219851	0.00541871	0.193543	0.00597713	0.00210957	0.00227503	0.00368141	0.00159252	0.00241981	0.0780956	0.0172696	0.076379	0.107113	0.00177866	0.00967922	0.0610329	0.00252322	0.04912	0.232281	0.00213026	0.0151186	0.0508986	0.0846725	0.0357387	0.191082	0.00649418	0.138611	0.0480031	0.0255424	0.00210957	0.0958615	0.0270935
s__Bifidobacterium_bifidum	0.0497198	0.000620463	0.000413642	0.000579099	0.00049637	0.000351596	0.0435979	0.0676925	0.000765238	0.000455006	0.000827284	0.0445286	0.00119956	0.0185518	0.029927	0.000289549	0.0402267	0.00293686	0.00039296	0.0139191	0	0	0	0	0	0	0.000227503	0	0	0	0	0	0	0	0	0.000517052	0	0	0	0	0	0	0.0016132	0.000330914	0	0.00878989	0	2.06821e-05	0.000206821
s__Bifidobacterium_kashiwanohense	1.448781e-01	5.706190e-02	1.633886e-03	1.396041e-02	1.571839e-03	2.481851e-03	2.463651e-01	3.337677e-01	7.093959e-03	4.115737e-03	1.951563e-01	2.881016e-02	1.915162e-02	3.175322e-01	8.541705e-03	3.352568e-02	3.261566e-02	2.397055e-02	1.603069e-01	6.721681e-02	3.515956e-04	3.309135e-04	1.447747e-04	4.963703e-04	2.068210e-04	2.481851e-04	3.060950e-03	2.688672e-04	3.309135e-04	2.798288e-02	1.654568e-04	3.309135e-04	4.550061e-04	8.272838e-05	4.136419e-04	4.963703e-04	2.130256e-03	0.000000e+00	2.709355e-03	1.046514e-02	1.054787e-03	0.000000e+00	2.481851e-04	6.059854e-03	8.891233e-02	6.204629e-04	0.000000e+00	2.086823e-02	2.854129e-03
s__CAG_177_sp003538135	0.000000e+00	0.000000e+00	0.000000e+00	0.000000e+00	6.204629e-05	0.000000e+00	0.000000e+00	0.000000e+00	1.385700e-03	0.000000e+00	0.000000e+00	0.000000e+00	5.377345e-04	0.000000e+00	0.000000e+00	0.000000e+00	0.000000e+00	0.000000e+00	0.000000e+00	2.068210e-05	0.000000e+00	2.068210e-04	0.000000e+00	0.000000e+00	0.000000e+00	0.000000e+00	0.000000e+00	8.272838e-05	6.245993e-03	2.068210e-05	0.000000e+00	6.204629e-05	0.000000e+00	0.000000e+00	0.000000e+00	1.654568e-04	0.000000e+00	0.000000e+00	0.000000e+00	6.204629e-05	3.102314e-04	0.000000e+00	5.149842e-03	1.489111e-03	2.068210e-05	7.238733e-04	4.343240e-04	2.895493e-04	0.000000e+00
s__CAG_217_sp000436335	0.000000e+00	0.000000e+00	0.000000e+00	0.000000e+00	1.654568e-04	1.034105e-04	8.272838e-05	6.204629e-05	2.068210e-04	1.034105e-04	5.542802e-03	1.034105e-04	1.526132e-01	1.447747e-04	0.000000e+00	0.000000e+00	0.000000e+00	0.000000e+00	0.000000e+00	0.000000e+00	1.964799e-03	1.083742e-02	0.000000e+00	4.157101e-03	8.479659e-04	2.730037e-03	2.171620e-03	3.515956e-04	3.598685e-03	6.204629e-05	0.000000e+00	5.377345e-04	1.447747e-03	2.068210e-04	2.688672e-04	1.427065e-03	8.066017e-04	3.019586e-03	0.000000e+00	1.323654e-03	0.000000e+00	0.000000e+00	2.378441e-03	2.688672e-03	0.000000e+00	6.204629e-05	1.447747e-04	0.000000e+00	0.000000e+00
s__CAG_41_sp900066215	8.396931e-03	3.702095e-03	3.102314e-04	2.192302e-03	1.613203e-03	3.722777e-03	6.204629e-05	1.075469e-03	1.240926e-04	5.997808e-04	4.550061e-04	3.888234e-03	1.447747e-02	2.357759e-03	5.046431e-03	4.425968e-03	2.150938e-03	2.423942e-02	1.034105e-04	1.757978e-03	4.550061e-04	2.688672e-04	6.080536e-03	1.034105e-04	2.998904e-03	7.652375e-04	6.163264e-03	3.722777e-04	4.550061e-04	1.240926e-04	3.453910e-03	2.895493e-04	3.350499e-03	3.122996e-03	4.136419e-05	0.000000e+00	3.722777e-03	0.000000e+00	4.136419e-03	3.309135e-04	1.054787e-03	5.584166e-04	1.404314e-02	5.584166e-04	2.916175e-03	5.170524e-04	8.066017e-04	4.136419e-05	1.509793e-03
s__Catenibacterium_mitsuokai	0	0	0.0209923	0	0	0	0	0	0	0	0	0	0	0	0	0	0	0	0	0	0.000144775	0.0145602	0.000558417	0.00117888	0.000268867	0.000186139	0.0481272	0	0.000248185	0.000351596	0.000268867	0.000165457	0.000268867	0	0	0.000641145	0.000227503	0.000930694	0.000186139	0.0904014	0.000620463	0.000206821	0.000620463	0.00101342	0.0891605	0.000372278	0.0158011	0	0.000558417
s__Catenibacterium_sp000437715	4.550061e-04	9.513764e-04	2.306881e-01	9.530310e-02	1.240926e-03	1.626233e-01	4.136419e-05	9.513764e-04	0.000000e+00	2.481851e-04	3.722777e-04	8.893301e-03	4.136419e-04	2.481851e-04	1.654568e-04	1.347232e-01	6.204629e-05	6.825092e-04	1.158197e-03	4.136419e-04	8.128064e-03	2.301917e-02	9.720585e-04	1.178879e-03	7.466236e-03	3.619367e-03	4.494219e-02	3.532502e-02	7.824037e-02	6.618271e-04	0.000000e+00	2.411532e-02	8.272838e-04	7.859196e-04	6.188083e-02	1.702136e-02	7.031912e-04	7.176687e-03	4.756882e-04	1.592521e-01	3.433228e-02	6.204629e-04	7.571715e-02	2.502534e-03	2.144733e-01	2.068210e-04	6.411450e-04	5.170524e-04	6.618271e-04
s__Clostridium_A_leptum	0.000000e+00	0.000000e+00	0.000000e+00	6.618271e-04	1.861389e-04	0.000000e+00	1.240926e-04	0.000000e+00	1.861389e-04	6.411450e-04	5.997808e-04	1.447747e-04	1.183016e-02	2.688672e-04	0.000000e+00	2.481851e-04	1.675250e-03	1.034105e-04	1.034105e-04	0.000000e+00	5.997808e-04	3.309135e-04	2.068210e-05	1.840707e-03	1.240926e-04	4.136419e-04	1.861389e-04	0.000000e+00	1.447747e-04	1.344336e-03	1.240926e-04	4.136419e-05	6.204629e-05	0.000000e+00	3.515956e-04	1.861389e-04	2.481851e-04	7.031912e-04	3.309135e-04	1.240926e-04	5.997808e-04	2.068210e-04	4.136419e-04	4.550061e-04	1.240926e-04	7.031912e-04	1.861389e-04	4.550061e-04	2.688672e-04
s__Comamonas_terrigena	0.000000e+00	0.000000e+00	0.000000e+00	0.000000e+00	6.411450e-04	0.000000e+00	0.000000e+00	0.000000e+00	0.000000e+00	0.000000e+00	0.000000e+00	0.000000e+00	0.000000e+00	0.000000e+00	0.000000e+00	0.000000e+00	0.000000e+00	0.000000e+00	0.000000e+00	0.000000e+00	1.240926e-04	0.000000e+00	6.204629e-05	1.300904e-02	0.000000e+00	0.000000e+00	4.136419e-05	0.000000e+00	2.068210e-04	4.136419e-05	0.000000e+00	0.000000e+00	2.068210e-05	0.000000e+00	0.000000e+00	0.000000e+00	1.034105e-04	5.311162e-02	0.000000e+00	1.861389e-04	1.654568e-04	1.034105e-04	4.136419e-05	1.861389e-04	0.000000e+00	0.000000e+00	0.000000e+00	2.068210e-05	1.861389e-03
s__Dialister_hominis	0.000000e+00	0.000000e+00	0.000000e+00	0.000000e+00	0.000000e+00	0.000000e+00	0.000000e+00	0.000000e+00	4.818928e-03	0.000000e+00	0.000000e+00	2.068210e-05	0.000000e+00	0.000000e+00	0.000000e+00	0.000000e+00	7.031912e-04	0.000000e+00	0.000000e+00	0.000000e+00	1.861389e-04	0.000000e+00	0.000000e+00	2.481851e-04	0.000000e+00	0.000000e+00	2.068210e-05	0.000000e+00	4.136419e-05	0.000000e+00	0.000000e+00	0.000000e+00	1.447747e-04	0.000000e+00	0.000000e+00	1.654568e-04	0.000000e+00	2.481851e-04	1.240926e-04	0.000000e+00	2.481851e-04	8.272838e-05	8.272838e-05	3.958553e-02	0.000000e+00	4.825133e-02	0.000000e+00	4.136419e-05	1.654568e-04
s__Dorea_formicigenerans	0.000847966	0.00930694	0.00614258	0.00293686	0.00585303	0.00386755	0.00283345	0.000827284	0.00241981	0.00421915	0.0148911	0.0133193	0.000972058	0.00980331	0.00599781	0.0025439	0.00725942	0.00039296	0.000144775	0.000248185	0.00897603	0.00850034	0.0083142	0.0063494	0.0108788	0.00616326	0.000558417	0.010279	0.00800397	0.00705259	0.0248599	0.00626667	0.0220264	0.00295754	0.0109408	0.00922421	0.0159873	0.0017373	0.000992741	0.0121197	0.00984468	0.000517052	0.00759033	0.00351596	0.00938967	0.000579099	0.0174971	0.00337118	0.010734
s__Enterococcus_faecalis	2.895493e-04	1.240926e-04	1.447747e-04	2.275031e-04	4.138487e-02	3.722777e-04	0.000000e+00	8.686480e-04	1.654568e-04	1.085810e-02	4.136419e-05	1.654568e-04	7.652375e-04	4.343240e-04	0.000000e+00	0.000000e+00	1.654568e-04	6.204629e-05	2.068210e-05	1.654568e-04	1.034105e-04	3.309135e-04	4.136419e-05	2.688672e-04	8.272838e-05	1.861389e-04	2.895493e-04	0.000000e+00	8.272838e-05	1.447747e-04	2.275031e-04	1.240926e-04	1.240926e-04	1.034105e-04	4.136419e-04	1.861389e-04	0.000000e+00	8.272838e-05	1.034105e-04	4.136419e-05	1.654568e-04	1.447747e-04	1.447747e-04	3.515956e-04	2.068210e-04	1.447747e-04	1.034105e-04	1.861389e-04	2.068210e-04
s__ER4_sp000765235	0.000000e+00	0.000000e+00	3.309135e-04	0.000000e+00	0.000000e+00	2.688672e-04	0.000000e+00	0.000000e+00	6.825092e-04	0.000000e+00	3.764141e-03	0.000000e+00	3.267771e-03	0.000000e+00	0.000000e+00	4.136419e-05	0.000000e+00	0.000000e+00	0.000000e+00	0.000000e+00	2.275031e-03	1.654568e-04	4.343240e-04	8.686480e-04	2.275031e-04	2.481851e-03	6.618271e-04	0.000000e+00	2.998904e-03	0.000000e+00	0.000000e+00	0.000000e+00	0.000000e+00	2.068210e-05	6.204629e-05	1.199562e-03	1.034105e-04	6.825092e-04	0.000000e+00	2.068210e-04	1.861389e-04	0.000000e+00	1.125106e-02	1.013423e-03	2.068210e-04	0.000000e+00	4.343240e-03	5.790987e-04	6.204629e-05
s__Erysipelatoclostridium_ramosum	1.757978e-03	1.199562e-03	0.000000e+00	2.895493e-04	4.136419e-05	0.000000e+00	4.157101e-03	5.790987e-04	0.000000e+00	0.000000e+00	0.000000e+00	0.000000e+00	0.000000e+00	2.068210e-04	6.825092e-04	0.000000e+00	4.136419e-05	1.096151e-03	1.147856e-02	2.068210e-04	0.000000e+00	0.000000e+00	0.000000e+00	0.000000e+00	0.000000e+00	0.000000e+00	0.000000e+00	0.000000e+00	0.000000e+00	8.893301e-04	1.654568e-04	0.000000e+00	0.000000e+00	2.068210e-05	1.654568e-04	5.584166e-04	0.000000e+00	0.000000e+00	4.136419e-05	0.000000e+00	0.000000e+00	0.000000e+00	0.000000e+00	0.000000e+00	0.000000e+00	1.861389e-04	0.000000e+00	0.000000e+00	0.000000e+00
s__Eubacterium_G_sp000434315	0.000000e+00	3.102314e-04	0.000000e+00	0.000000e+00	0.000000e+00	0.000000e+00	0.000000e+00	0.000000e+00	0.000000e+00	0.000000e+00	8.066017e-04	1.240926e-03	0.000000e+00	1.861389e-04	0.000000e+00	8.272838e-05	0.000000e+00	0.000000e+00	0.000000e+00	0.000000e+00	9.927406e-04	1.861389e-04	5.418709e-03	3.309135e-04	2.481851e-04	7.859196e-04	0.000000e+00	0.000000e+00	1.654568e-04	0.000000e+00	0.000000e+00	1.447747e-04	0.000000e+00	0.000000e+00	0.000000e+00	0.000000e+00	2.275031e-04	2.068210e-04	0.000000e+00	0.000000e+00	0.000000e+00	0.000000e+00	0.000000e+00	1.323654e-03	0.000000e+00	0.000000e+00	0.000000e+00	0.000000e+00	1.034105e-04
s__Faecalibacillus_intestinalis	0.000000e+00	1.034105e-04	0.000000e+00	6.204629e-05	1.017559e-02	1.365018e-03	2.481851e-04	1.654568e-04	2.730037e-03	8.913983e-03	4.984385e-03	5.790987e-04	1.207834e-02	8.024653e-03	2.481851e-04	1.054787e-03	0.000000e+00	1.034105e-04	0.000000e+00	2.068210e-05	1.447747e-04	4.550061e-04	4.488015e-03	9.720585e-04	1.530475e-03	8.272838e-05	5.170524e-04	5.460073e-03	3.515956e-04	3.722777e-04	2.785878e-02	4.095055e-03	3.162292e-02	3.557320e-03	2.130256e-03	2.337077e-03	1.811752e-02	7.238733e-04	7.197369e-03	2.481851e-04	6.825092e-04	0.000000e+00	1.654568e-04	2.957540e-03	3.102314e-04	3.929598e-04	2.895493e-04	2.688672e-03	1.451883e-02
s__Faecalibacterium_prausnitzii_D	2.895493e-04	3.991644e-03	1.706273e-02	0.000000e+00	3.102314e-04	7.859196e-04	2.895493e-04	5.377345e-04	9.100122e-04	3.464251e-02	2.812765e-03	1.158197e-02	3.267771e-03	9.306943e-04	4.756882e-03	3.267771e-03	2.854129e-03	1.906889e-02	0.000000e+00	3.102314e-04	7.238733e-04	3.495274e-03	6.945048e-02	4.550061e-03	2.688672e-03	1.282290e-03	4.401150e-02	9.720585e-04	1.007218e-02	1.654568e-04	3.970962e-03	5.790987e-04	7.031912e-04	4.550061e-04	3.722777e-04	3.722777e-04	1.778660e-03	6.204629e-04	7.631693e-03	6.576906e-03	7.652375e-04	1.278154e-02	3.970962e-03	6.576906e-03	9.513764e-04	6.028831e-02	3.764141e-03	1.551157e-03	1.034105e-03
s__Faecalitalea_cylindroides	0.000000e+00	0.000000e+00	0.000000e+00	0.000000e+00	2.068210e-04	0.000000e+00	0.000000e+00	0.000000e+00	2.275031e-04	8.272838e-05	1.654568e-04	0.000000e+00	0.000000e+00	0.000000e+00	0.000000e+00	0.000000e+00	0.000000e+00	0.000000e+00	0.000000e+00	0.000000e+00	4.136419e-04	0.000000e+00	9.927406e-04	0.000000e+00	0.000000e+00	1.654568e-04	0.000000e+00	0.000000e+00	2.068210e-05	0.000000e+00	1.695932e-03	0.000000e+00	1.447747e-04	1.034105e-04	2.481851e-04	0.000000e+00	0.000000e+00	0.000000e+00	0.000000e+00	0.000000e+00	0.000000e+00	0.000000e+00	0.000000e+00	0.000000e+00	6.204629e-05	0.000000e+00	0.000000e+00	0.000000e+00	1.861389e-04
s__Fimenecus_sp000432435	0.000000e+00	0.000000e+00	4.963703e-04	0.000000e+00	0.000000e+00	0.000000e+00	0.000000e+00	0.000000e+00	2.088892e-03	0.000000e+00	6.204629e-05	0.000000e+00	0.000000e+00	0.000000e+00	0.000000e+00	9.513764e-04	0.000000e+00	0.000000e+00	0.000000e+00	0.000000e+00	2.068210e-05	2.688672e-04	2.068210e-04	8.132200e-02	1.799342e-03	2.481851e-04	2.895493e-04	6.204629e-05	0.000000e+00	0.000000e+00	6.204629e-05	6.204629e-05	1.034105e-04	6.204629e-05	6.204629e-05	0.000000e+00	2.068210e-05	3.722777e-04	3.309135e-04	3.515956e-04	3.102314e-04	4.115737e-03	3.819983e-02	5.584166e-04	6.411450e-04	2.957540e-03	7.652375e-03	0.000000e+00	1.116833e-03
s__Fusicatenibacter_saccharivorans	0	0.064404	0.019648	0.0190689	0.00239912	0.00974127	0.0175177	0.0301131	0.00486029	0.0188414	0.0108167	0.0369382	0.0568137	0.00332982	0.0501127	0.0101549	0.00297822	0.0630597	0.00126161	0.00626667	0.00756965	0.0179521	0.0269488	0.00835557	0.00725942	0.00390892	0.0811772	0.0118508	0.0193171	0.000703191	0.0201444	0.00672168	0.0290377	0.00816943	0.00109615	0.00239912	0.00469484	0.00494302	0.00475688	0.00564621	0.0142293	0.0359455	0.0467002	0.00798329	0.00959649	0.0143947	0.00465347	0.00252322	0.0230812
s__Gemmiger_qucibialis	0.000434324	0.00810738	0.00659759	0.000289549	0.00442597	0.0125747	0.000599781	0.00105479	0.0202478	0.0158838	0.0213646	0.056338	0.15162	0.00190275	0.00618395	0.00630804	0.0110029	0.00359868	0.0174557	0.00117888	0.00527393	0.0217576	0.0394821	0.0205994	0.0150772	0.00374346	0.0141466	0.0113338	0.0448181	0.00500507	0.042481	0.00610122	0.0217369	0.00713532	0.00610122	0.00709396	0.037931	0.003578	0.0148497	0.0296995	0.0274658	0.0180762	0.0195446	0.00903808	0.0167939	0.000558417	0.0104238	0.00959649	0.0121404
s__Holdemanella_biformis	0	0	0.0560278	0	0	0	0.000413642	0	0	0.0192343	0	0	0	0	0.000248185	0.0118715	0	0	0	0	0.0156357	0.0175798	0.000372278	0.0029989	0.00405369	0.0129056	0.102335	0.0257492	0.0443217	0.0714566	0.000744555	0.0278381	0.0843002	0.0998738	0.00457074	0.0682716	0.0403921	0.00314368	0.000517052	0.011189	0.000806602	0.000930694	0.0207855	0.0793986	0.00581167	0.000455006	0.0053153	0.000330914	0.100101
s__KLE1615_sp900066985	0.000000e+00	0.000000e+00	6.618271e-04	0.000000e+00	0.000000e+00	0.000000e+00	0.000000e+00	0.000000e+00	3.102314e-04	2.895493e-04	1.944117e-03	0.000000e+00	6.825092e-04	0.000000e+00	0.000000e+00	0.000000e+00	0.000000e+00	0.000000e+00	0.000000e+00	0.000000e+00	2.068210e-04	2.750719e-03	5.377345e-04	1.263676e-02	0.000000e+00	6.411450e-04	0.000000e+00	1.034105e-04	2.212984e-03	1.240926e-04	0.000000e+00	1.654568e-04	2.688672e-04	2.275031e-04	0.000000e+00	4.550061e-04	0.000000e+00	1.509793e-03	2.481851e-04	4.095055e-03	1.654568e-04	2.275031e-04	1.001013e-02	2.275031e-03	3.309135e-04	0.000000e+00	3.908916e-03	5.584166e-04	4.136419e-04
s__Lactococcus_cremoris	1.034105e-04	1.654568e-04	1.178879e-03	8.272838e-05	7.859196e-04	0.000000e+00	8.272838e-05	4.136419e-05	2.688672e-04	1.240926e-03	8.272838e-05	1.447747e-04	3.743459e-03	1.220244e-03	0.000000e+00	1.034105e-04	2.068210e-04	1.034105e-04	5.377345e-04	4.756882e-04	2.150938e-02	0.000000e+00	6.204629e-05	8.272838e-05	1.158197e-03	1.513929e-02	1.137515e-03	3.309135e-04	6.204629e-05	2.461169e-03	2.068210e-05	9.100122e-04	8.272838e-05	1.034105e-04	1.654568e-04	1.861389e-04	4.136419e-04	5.584166e-04	2.895493e-04	0.000000e+00	2.068210e-04	0.000000e+00	0.000000e+00	6.204629e-05	0.000000e+00	2.068210e-05	1.240926e-04	6.204629e-05	4.136419e-05
s__Ligilactobacillus_ruminis	0.21042	0.000537734	0.000868648	0.000517052	0.00146843	0.0328432	0.00175798	0.000579099	0.0821906	0.000144775	0.0552419	0.00421915	0.00101342	0.000434324	0.000910012	0.000248185	0.000599781	0.000227503	0.000310231	0.000268867	0.00614258	0.168642	0.263697	0.157742	0.241505	0.00541871	0.00310231	0.0870096	0.137867	0.149842	0.024984	0.0704639	0.0576617	0.00432256	0.0610535	0.0423983	0.00126161	0.00703191	0.0016132	0.00332982	0.0155736	0.273459	0.00132365	0.144402	0.0606192	0.10217	0.00322641	0.000455006	0.010672
s__Ligilactobacillus_salivarius	2.481851e-03	0.000000e+00	6.204629e-05	4.963703e-04	0.000000e+00	1.654568e-04	4.550061e-04	1.013423e-03	0.000000e+00	1.923435e-03	0.000000e+00	4.136419e-05	0.000000e+00	6.204629e-05	2.068210e-05	5.790987e-04	0.000000e+00	0.000000e+00	2.688672e-04	6.204629e-05	1.592521e-03	4.136419e-05	9.782631e-03	4.343240e-04	2.688672e-04	1.199562e-03	1.509793e-03	6.204629e-05	4.136419e-04	7.280098e-03	0.000000e+00	1.034105e-04	2.688672e-04	4.136419e-05	4.756882e-04	7.031912e-04	6.204629e-05	1.902753e-03	0.000000e+00	7.652375e-04	4.963703e-04	5.997808e-04	4.550061e-04	9.100122e-04	2.068210e-05	1.633886e-03	0.000000e+00	1.447747e-04	8.066017e-04
s__Limosilactobacillus_mucosae	7.445554e-04	0.000000e+00	0.000000e+00	0.000000e+00	0.000000e+00	0.000000e+00	1.509793e-03	0.000000e+00	1.365018e-03	0.000000e+00	0.000000e+00	0.000000e+00	0.000000e+00	0.000000e+00	0.000000e+00	0.000000e+00	0.000000e+00	0.000000e+00	0.000000e+00	0.000000e+00	0.000000e+00	0.000000e+00	0.000000e+00	3.309135e-04	0.000000e+00	0.000000e+00	1.365018e-03	0.000000e+00	0.000000e+00	0.000000e+00	8.272838e-05	0.000000e+00	3.102314e-04	0.000000e+00	0.000000e+00	0.000000e+00	2.068210e-05	1.447747e-04	2.688672e-04	3.764141e-03	4.756882e-04	4.922339e-03	0.000000e+00	2.275031e-04	0.000000e+00	7.149800e-02	2.068210e-04	2.688672e-04	1.034105e-04
s__Parabacteroides_merdae	0.000000e+00	0.000000e+00	1.447747e-04	0.000000e+00	0.000000e+00	1.034105e-04	0.000000e+00	0.000000e+00	4.756882e-04	0.000000e+00	0.000000e+00	0.000000e+00	8.272838e-05	0.000000e+00	0.000000e+00	0.000000e+00	4.136419e-05	0.000000e+00	0.000000e+00	0.000000e+00	3.929598e-04	1.447747e-04	3.929598e-04	4.694836e-03	1.240926e-04	3.102314e-04	0.000000e+00	3.102314e-04	5.377345e-04	1.447747e-04	1.447747e-04	1.861389e-04	8.272838e-05	0.000000e+00	8.272838e-05	4.136419e-05	6.204629e-05	2.688672e-04	8.272838e-05	8.272838e-05	0.000000e+00	7.031912e-04	3.929598e-04	5.790987e-04	0.000000e+00	0.000000e+00	0.000000e+00	1.820024e-03	0.000000e+00
s__Phil1_sp002069725	0.000000e+00	0.000000e+00	0.000000e+00	0.000000e+00	9.120804e-03	0.000000e+00	0.000000e+00	0.000000e+00	3.846870e-03	0.000000e+00	1.385700e-03	1.861389e-04	4.136419e-05	0.000000e+00	0.000000e+00	1.654568e-04	0.000000e+00	0.000000e+00	0.000000e+00	0.000000e+00	2.171620e-03	0.000000e+00	0.000000e+00	0.000000e+00	0.000000e+00	2.419805e-03	0.000000e+00	0.000000e+00	3.515956e-04	0.000000e+00	0.000000e+00	0.000000e+00	0.000000e+00	0.000000e+00	5.997808e-04	7.445554e-04	0.000000e+00	2.399123e-03	0.000000e+00	0.000000e+00	0.000000e+00	0.000000e+00	7.238733e-04	1.840707e-03	0.000000e+00	0.000000e+00	1.240926e-03	1.799342e-03	0.000000e+00
s__Phocaeicola_dorei	0.000000e+00	0.000000e+00	0.000000e+00	0.000000e+00	1.861389e-04	0.000000e+00	0.000000e+00	0.000000e+00	4.963703e-04	0.000000e+00	0.000000e+00	1.240926e-04	1.137515e-03	8.272838e-05	0.000000e+00	0.000000e+00	0.000000e+00	0.000000e+00	1.034105e-04	0.000000e+00	8.624434e-03	0.000000e+00	6.204629e-05	4.674154e-03	0.000000e+00	6.225311e-03	1.861389e-04	0.000000e+00	8.603752e-03	0.000000e+00	3.515956e-04	1.654568e-04	0.000000e+00	0.000000e+00	0.000000e+00	0.000000e+00	1.861389e-04	0.000000e+00	0.000000e+00	0.000000e+00	0.000000e+00	0.000000e+00	0.000000e+00	2.419805e-03	0.000000e+00	0.000000e+00	0.000000e+00	9.513764e-04	0.000000e+00
s__Phocaeicola_vulgatus	0.000000e+00	0.000000e+00	0.000000e+00	0.000000e+00	0.000000e+00	0.000000e+00	0.000000e+00	0.000000e+00	1.034105e-03	0.000000e+00	2.481851e-04	0.000000e+00	2.088892e-03	0.000000e+00	0.000000e+00	0.000000e+00	2.068210e-04	4.136419e-05	0.000000e+00	0.000000e+00	1.302972e-03	0.000000e+00	3.722777e-04	0.000000e+00	1.034105e-04	2.440487e-03	0.000000e+00	0.000000e+00	1.654568e-04	2.688672e-04	4.343240e-04	0.000000e+00	0.000000e+00	0.000000e+00	4.550061e-04	0.000000e+00	2.481851e-04	1.116833e-03	3.929598e-04	0.000000e+00	0.000000e+00	0.000000e+00	4.136419e-04	1.654568e-03	0.000000e+00	3.505615e-02	8.893301e-04	3.102314e-04	0.000000e+00
s__RUG472_sp902768995	0.000000e+00	0.000000e+00	0.000000e+00	0.000000e+00	8.272838e-05	0.000000e+00	0.000000e+00	0.000000e+00	3.722777e-04	0.000000e+00	1.923435e-03	1.654568e-04	0.000000e+00	0.000000e+00	0.000000e+00	1.034105e-04	1.447747e-04	0.000000e+00	0.000000e+00	0.000000e+00	1.840707e-03	4.756882e-04	0.000000e+00	0.000000e+00	6.204629e-05	3.764141e-03	0.000000e+00	0.000000e+00	1.654568e-04	0.000000e+00	0.000000e+00	0.000000e+00	0.000000e+00	0.000000e+00	4.136419e-05	2.068210e-04	0.000000e+00	4.053691e-03	1.861389e-04	0.000000e+00	8.066017e-04	0.000000e+00	2.254348e-03	1.365018e-03	0.000000e+00	0.000000e+00	1.220244e-03	0.000000e+00	4.550061e-04
s__Ruminococcus_C_callidus	0.000000e+00	0.000000e+00	0.000000e+00	0.000000e+00	0.000000e+00	0.000000e+00	0.000000e+00	0.000000e+00	0.000000e+00	0.000000e+00	1.096151e-03	8.272838e-05	5.728940e-03	0.000000e+00	0.000000e+00	6.825092e-04	0.000000e+00	0.000000e+00	0.000000e+00	0.000000e+00	0.000000e+00	7.031912e-04	3.536638e-03	1.484974e-02	4.446651e-03	0.000000e+00	1.447747e-04	7.031912e-04	5.087795e-03	8.272838e-05	0.000000e+00	8.893301e-04	1.240926e-04	4.136419e-05	1.323654e-03	0.000000e+00	4.136419e-03	1.180948e-02	0.000000e+00	2.481851e-04	2.068210e-04	4.425968e-03	5.584166e-04	3.515956e-04	2.068210e-04	0.000000e+00	1.654568e-04	0.000000e+00	4.012327e-03
s__Ruminococcus_E_bromii_B	3.309135e-04	2.068210e-04	8.272838e-05	1.861389e-04	0.000000e+00	1.635954e-02	4.550061e-04	5.108478e-03	4.756882e-04	0.000000e+00	2.401191e-02	1.098219e-02	1.034105e-04	0.000000e+00	4.686563e-02	1.571839e-03	1.197493e-02	4.756882e-04	5.997808e-04	5.170524e-04	2.688672e-04	1.240926e-04	2.041323e-02	2.481851e-04	8.272838e-05	8.272838e-05	3.784823e-03	7.445554e-04	2.068210e-04	1.292631e-02	2.895493e-04	1.075469e-03	3.019586e-02	8.272838e-05	7.714422e-03	4.686563e-02	1.207834e-02	6.204629e-03	7.720626e-02	7.859196e-04	2.068210e-04	6.204629e-05	3.886166e-02	2.132324e-02	0.000000e+00	7.859196e-04	1.015491e-02	4.963703e-04	1.861389e-04
s__Ruthenibacterium_lactatiformans	0.000000e+00	0.000000e+00	0.000000e+00	1.447747e-04	4.136419e-05	0.000000e+00	0.000000e+00	0.000000e+00	2.068210e-04	1.034105e-04	3.102314e-04	1.034105e-04	3.764141e-03	1.861389e-04	0.000000e+00	0.000000e+00	7.445554e-04	1.654568e-04	0.000000e+00	0.000000e+00	3.722777e-04	2.688672e-04	8.272838e-05	0.000000e+00	8.272838e-05	2.481851e-04	2.481851e-04	3.309135e-04	3.929598e-04	1.571839e-03	2.068210e-05	1.034105e-04	1.447747e-04	2.068210e-05	8.893301e-04	8.893301e-04	4.136419e-05	2.688672e-04	3.515956e-04	0.000000e+00	2.688672e-04	4.136419e-05	8.272838e-05	6.204629e-05	1.240926e-04	3.309135e-03	1.654568e-04	1.131311e-02	2.068210e-04
s__Senegalimassilia_anaerobia	0.000000e+00	0.000000e+00	0.000000e+00	0.000000e+00	0.000000e+00	0.000000e+00	8.272838e-05	0.000000e+00	1.199562e-03	0.000000e+00	3.929598e-03	5.873715e-03	1.406382e-03	0.000000e+00	0.000000e+00	0.000000e+00	0.000000e+00	0.000000e+00	0.000000e+00	0.000000e+00	1.613203e-03	0.000000e+00	0.000000e+00	0.000000e+00	1.034105e-04	0.000000e+00	0.000000e+00	2.399123e-03	0.000000e+00	0.000000e+00	0.000000e+00	4.136419e-04	1.985481e-03	2.068210e-05	2.916175e-03	6.638953e-03	0.000000e+00	4.963703e-04	0.000000e+00	0.000000e+00	3.102314e-04	0.000000e+00	0.000000e+00	0.000000e+00	0.000000e+00	0.000000e+00	0.000000e+00	0.000000e+00	0.000000e+00
s__Streptococcus_mutans	1.447747e-04	0.000000e+00	0.000000e+00	2.688672e-04	0.000000e+00	0.000000e+00	0.000000e+00	0.000000e+00	0.000000e+00	2.895493e-04	0.000000e+00	1.240926e-04	0.000000e+00	2.068210e-04	1.240926e-04	0.000000e+00	8.272838e-05	0.000000e+00	1.861389e-04	0.000000e+00	0.000000e+00	0.000000e+00	6.204629e-05	0.000000e+00	0.000000e+00	0.000000e+00	2.688672e-04	0.000000e+00	1.240926e-04	8.024653e-03	0.000000e+00	0.000000e+00	0.000000e+00	0.000000e+00	0.000000e+00	0.000000e+00	1.034105e-04	0.000000e+00	1.034105e-04	0.000000e+00	2.481851e-04	1.654568e-04	0.000000e+00	0.000000e+00	0.000000e+00	2.068210e-05	0.000000e+00	0.000000e+00	0.000000e+00
s__Streptococcus_thermophilus	0	0	0	0	0	0	0	0	0.00177866	0.000847966	0	0	0	0	0	0	0.00159252	0	0	0	0	0	0	0	0	0	0	0	0	0	0	0	0	0	0	0	0	0	0	0	0	0	0	0	0	0	0	0	0
s__Turicibacter_sp001543345	3.557320e-03	2.068210e-05	0.000000e+00	2.275031e-04	6.370085e-03	8.893301e-04	1.240926e-04	6.204629e-04	6.349403e-03	5.170524e-04	0.000000e+00	0.000000e+00	2.068210e-04	9.513764e-04	8.272838e-05	6.204629e-05	6.204629e-05	1.757978e-03	4.136419e-05	0.000000e+00	2.399123e-03	3.515956e-04	6.204629e-05	3.722777e-04	1.034105e-04	2.047527e-03	5.894397e-03	1.034105e-04	4.550061e-04	8.272838e-05	6.204629e-05	6.204629e-05	0.000000e+00	0.000000e+00	4.963703e-04	7.652375e-04	0.000000e+00	5.997808e-04	2.192302e-03	0.000000e+00	6.618271e-04	6.204629e-05	6.204629e-05	0.000000e+00	2.068210e-05	0.000000e+00	1.137515e-03	2.916175e-03	2.068210e-05
s__UBA1417_sp003531055	0.000000e+00	0.000000e+00	2.895493e-04	0.000000e+00	2.068210e-03	2.543898e-03	0.000000e+00	0.000000e+00	0.000000e+00	0.000000e+00	9.555128e-03	4.136419e-05	9.224215e-03	0.000000e+00	6.204629e-05	1.757978e-03	1.406382e-03	4.136419e-05	2.068210e-05	2.068210e-05	2.006163e-03	2.895493e-03	1.199562e-03	0.000000e+00	2.337077e-03	1.757978e-03	2.026845e-03	9.306943e-04	1.923435e-03	0.000000e+00	4.136419e-05	7.859196e-04	2.730037e-03	8.272838e-05	2.109574e-03	5.790987e-04	2.481851e-04	2.295713e-03	1.737296e-03	9.513764e-04	3.081632e-03	0.000000e+00	1.083742e-02	4.550061e-04	7.652375e-04	0.000000e+00	8.831255e-03	6.618271e-04	0.000000e+00
Group	HC	HC	HC	HC	HC	HC	HC	HC	HC	HC	HC	HC	HC	HC	HC	HC	HC	HC	HC	HC	MW	MW	MW	MW	MW	MW	MW	MW	MW	MW	MW	MW	MW	MW	MW	MW	MW	MW	MW	MW	MW	MW	MW	MW	MW	MW	MW	MW	MW
sample	H33	H34	H35	H36	H37	H38	H39	H40	H41	H42	H43	H44	H45	H46	H47	H48	H49	H50	H51	H52	RAS1	RAS10	RAS11	RAS12	RAS14	RAS15	RAS16	RAS17	RAS18	RAS19	RAS2	RAS20	RAS21	RAS23	RAS25	RAS26	RAS27	RAS28	RAS3	RAS30	RAS31	RAS32	RAS33	RAS35	RAS36	RAS4	RAS5	RAS6	RAS7
[truncated: 41 more columns]

## Sheet: Alpha diversity (MWvsHC)
Alpha diversity of Chao, Observed and Shannon for MW and HC generated from MicrobiomeAnalyst2
Chao									Observed									Shannon
	Group	sample_id	samples	variable	value	se				Group	sample_id	samples	variable	value	se				Group	sample_id	samples	variable	value	se
1	HC	H33	H33	Chao1	38	0			1	HC	H33	H33	Observed	38				1	HC	H33	H33	Shannon	2.10801
2	HC	H34	H34	Chao1	37	0.246598			2	HC	H34	H34	Observed	37				2	HC	H34	H34	Shannon	2.02692
3	HC	H35	H35	Chao1	50.5	2.58949			3	HC	H35	H35	Observed	49				3	HC	H35	H35	Shannon	2.45873
4	HC	H36	H36	Chao1	43	0			4	HC	H36	H36	Observed	43				4	HC	H36	H36	Shannon	2.23028
5	HC	H37	H37	Chao1	52	0			5	HC	H37	H37	Observed	52				5	HC	H37	H37	Shannon	2.55483
6	HC	H38	H38	Chao1	40	0.49371			6	HC	H38	H38	Observed	40				6	HC	H38	H38	Shannon	2.42646
7	HC	H39	H39	Chao1	40	0.16457			7	HC	H39	H39	Observed	40				7	HC	H39	H39	Shannon	1.94487
8	HC	H40	H40	Chao1	41	0.246932			8	HC	H40	H40	Observed	41				8	HC	H40	H40	Shannon	2.08884
9	HC	H41	H41	Chao1	60	0.495816			9	HC	H41	H41	Observed	60				9	HC	H41	H41	Shannon	2.3522
10	HC	H42	H42	Chao1	48	0			10	HC	H42	H42	Observed	48				10	HC	H42	H42	Shannon	2.60495
11	HC	H43	H43	Chao1	58	0			11	HC	H43	H43	Observed	58				11	HC	H43	H43	Shannon	2.7315
12	HC	H44	H44	Chao1	55.25	0.735664			12	HC	H44	H44	Observed	55				12	HC	H44	H44	Shannon	2.47995
13	HC	H45	H45	Chao1	54	0			13	HC	H45	H45	Observed	54				13	HC	H45	H45	Shannon	2.77707
14	HC	H46	H46	Chao1	44	0			14	HC	H46	H46	Observed	44				14	HC	H46	H46	Shannon	2.23318
15	HC	H47	H47	Chao1	35	2.32071			15	HC	H47	H47	Observed	34				15	HC	H47	H47	Shannon	1.95851
16	HC	H48	H48	Chao1	48	0			16	HC	H48	H48	Observed	48				16	HC	H48	H48	Shannon	2.51904
17	HC	H49	H49	Chao1	47	0			17	HC	H49	H49	Observed	47				17	HC	H49	H49	Shannon	2.20828
18	HC	H50	H50	Chao1	39	0			18	HC	H50	H50	Observed	39				18	HC	H50	H50	Shannon	2.16284
19	HC	H51	H51	Chao1	43.5	2.5881			19	HC	H51	H51	Observed	42				19	HC	H51	H51	Shannon	1.543
20	HC	H52	H52	Chao1	40	4.16458			20	HC	H52	H52	Observed	37				20	HC	H52	H52	Shannon	1.87702
21	MW	RAS1	RAS1	Chao1	66	2.33225			21	MW	RAS1	RAS1	Observed	65				21	MW	RAS1	RAS1	Shannon	2.12922
22	MW	RAS10	RAS10	Chao1	59.3333	0.924497			22	MW	RAS10	RAS10	Observed	59				22	MW	RAS10	RAS10	Shannon	2.55793
23	MW	RAS11	RAS11	Chao1	62.3333	0.924584			23	MW	RAS11	RAS11	Observed	62				23	MW	RAS11	RAS11	Shannon	2.56586
24	MW	RAS12	RAS12	Chao1	61	0			24	MW	RAS12	RAS12	Observed	61				24	MW	RAS12	RAS12	Shannon	2.65926
25	MW	RAS14	RAS14	Chao1	61.5	1.29551			25	MW	RAS14	RAS14	Observed	61				25	MW	RAS14	RAS14	Shannon	2.11999
26	MW	RAS15	RAS15	Chao1	61	0			26	MW	RAS15	RAS15	Observed	61				26	MW	RAS15	RAS15	Shannon	1.79737
27	MW	RAS16	RAS16	Chao1	58	0.247835			27	MW	RAS16	RAS16	Observed	58				27	MW	RAS16	RAS16	Shannon	2.85617
28	MW	RAS17	RAS17	Chao1	51	0			28	MW	RAS17	RAS17	Observed	51				28	MW	RAS17	RAS17	Shannon	2.52954
29	MW	RAS18	RAS18	Chao1	65	0.16538			29	MW	RAS18	RAS18	Observed	65				29	MW	RAS18	RAS18	Shannon	2.79527
30	MW	RAS19	RAS19	Chao1	53.75	1.42178			30	MW	RAS19	RAS19	Observed	53				30	MW	RAS19	RAS19	Shannon	2.50042
31	MW	RAS2	RAS2	Chao1	54.3333	0.924332			31	MW	RAS2	RAS2	Observed	54				31	MW	RAS2	RAS2	Shannon	2.11732
32	MW	RAS20	RAS20	Chao1	57	0.165198			32	MW	RAS20	RAS20	Observed	57				32	MW	RAS20	RAS20	Shannon	2.35953
33	MW	RAS21	RAS21	Chao1	60	4.62736			33	MW	RAS21	RAS21	Observed	57				33	MW	RAS21	RAS21	Shannon	2.5733
34	MW	RAS23	RAS23	Chao1	51	2.58343			34	MW	RAS23	RAS23	Observed	49				34	MW	RAS23	RAS23	Shannon	1.75552
35	MW	RAS25	RAS25	Chao1	57	0			35	MW	RAS25	RAS25	Observed	57				35	MW	RAS25	RAS25	Shannon	2.4968
36	MW	RAS26	RAS26	Chao1	53.5	1.29498			36	MW	RAS26	RAS26	Observed	53				36	MW	RAS26	RAS26	Shannon	2.62138
37	MW	RAS27	RAS27	Chao1	55.3333	0.924367			37	MW	RAS27	RAS27	Observed	55				37	MW	RAS27	RAS27	Shannon	2.37676
38	MW	RAS28	RAS28	Chao1	58	0			38	MW	RAS28	RAS28	Observed	58				38	MW	RAS28	RAS28	Shannon	2.31477
39	MW	RAS3	RAS3	Chao1	59	0			39	MW	RAS3	RAS3	Observed	59				39	MW	RAS3	RAS3	Shannon	2.17774
40	MW	RAS30	RAS30	Chao1	52	0			40	MW	RAS30	RAS30	Observed	52				40	MW	RAS30	RAS30	Shannon	2.64737
41	MW	RAS31	RAS31	Chao1	61	0.165295			41	MW	RAS31	RAS31	Observed	61				41	MW	RAS31	RAS31	Shannon	2.35768
42	MW	RAS32	RAS32	Chao1	53.3333	0.924295			42	MW	RAS32	RAS32	Observed	53				42	MW	RAS32	RAS32	Shannon	2.35673
43	MW	RAS33	RAS33	Chao1	63	0			43	MW	RAS33	RAS33	Observed	63				43	MW	RAS33	RAS33	Shannon	2.78636
44	MW	RAS35	RAS35	Chao1	59	0			44	MW	RAS35	RAS35	Observed	59				44	MW	RAS35	RAS35	Shannon	2.84616
45	MW	RAS36	RAS36	Chao1	52	4.62175			45	MW	RAS36	RAS36	Observed	49				45	MW	RAS36	RAS36	Shannon	2.64582
46	MW	RAS4	RAS4	Chao1	56	4.62476			46	MW	RAS4	RAS4	Observed	53				46	MW	RAS4	RAS4	Shannon	2.7942
47	MW	RAS5	RAS5	Chao1	54	0			47	MW	RAS5	RAS5	Observed	54				47	MW	RAS5	RAS5	Shannon	2.19322
48	MW	RAS6	RAS6	Chao1	58.25	0.735726			48	MW	RAS6	RAS6	Observed	58				48	MW	RAS6	RAS6	Shannon	1.93177
49	MW	RAS7	RAS7	Chao1	52	0.247584			49	MW	RAS7	RAS7	Observed	52				49	MW	RAS7	RAS7	Shannon	2.3775
50	MW	RAS8	RAS8	Chao1	59	2.33071			50	MW	RAS8	RAS8	Observed	58				50	MW	RAS8	RAS8	Shannon	2.75607
51	MW	RAS9	RAS9	Chao1	55	0.247717			51	MW	RAS9	RAS9	Observed	55				51	MW	RAS9	RAS9	Shannon	2.81329
52	HC	SS001	SS001	Chao1	61	0			52	HC	SS001	SS001	Observed	61				52	HC	SS001	SS001	Shannon	2.89439
53	HC	SS003	SS003	Chao1	54	0			53	HC	SS003	SS003	Observed	54				53	HC	SS003	SS003	Shannon	2.57563
54	HC	SS004	SS004	Chao1	45	0			54	HC	SS004	SS004	Observed	45				54	HC	SS004	SS004	Shannon	2.0396
55	HC	SS005	SS005	Chao1	51	2.32843			55	HC	SS005	SS005	Observed	50				55	HC	SS005	SS005	Shannon	2.29071
56	HC	SS006	SS006	Chao1	51	0			56	HC	SS006	SS006	Observed	51				56	HC	SS006	SS006	Shannon	2.29666
57	HC	SS007	SS007	Chao1	47	0			57	HC	SS007	SS007	Observed	47				57	HC	SS007	SS007	Shannon	2.33452
58	HC	SS008	SS008	Chao1	47	0			58	HC	SS008	SS008	Observed	47				58	HC	SS008	SS008	Shannon	2.07719
59	HC	SS009	SS009	Chao1	50	0			59	HC	SS009	SS009	Observed	50				59	HC	SS009	SS009	Shannon	2.52851
60	HC	SS011	SS011	Chao1	44	0			60	HC	SS011	SS011	Observed	44				60	HC	SS011	SS011	Shannon	2.71699
61	HC	SS012	SS012	Chao1	52	0			61	HC	SS012	SS012	Observed	52				61	HC	SS012	SS012	Shannon	2.56653
62	HC	SS013	SS013	Chao1	42.5	1.29393			62	HC	SS013	SS013	Observed	42				62	HC	SS013	SS013	Shannon	2.27868
63	HC	SS016	SS016	Chao1	53	0			63	HC	SS016	SS016	Observed	53				63	HC	SS016	SS016	Shannon	2.554
64	HC	SS018	SS018	Chao1	51	0			64	HC	SS018	SS018	Observed	51				64	HC	SS018	SS018	Shannon	2.70059
65	HC	SS019	SS019	Chao1	54	0			65	HC	SS019	SS019	Observed	54				65	HC	SS019	SS019	Shannon	2.81854
66	HC	SS020	SS020	Chao1	47	0.494652			66	HC	SS020	SS020	Observed	47				66	HC	SS020	SS020	Shannon	2.46546
67	HC	SS032	SS032	Chao1	47	0			67	HC	SS032	SS032	Observed	47				67	HC	SS032	SS032	Shannon	2.36223
68	HC	SS034	SS034	Chao1	49	0			68	HC	SS034	SS034	Observed	49				68	HC	SS034	SS034	Shannon	2.69737
69	HC	SS035	SS035	Chao1	54	0.495349			69	HC	SS035	SS035	Observed	54				69	HC	SS035	SS035	Shannon	2.89437
70	HC	SS036	SS036	Chao1	49	0			70	HC	SS036	SS036	Observed	49				70	HC	SS036	SS036	Shannon	2.31732
71	HC	SS038	SS038	Chao1	54	0			71	HC	SS038	SS038	Observed	54				71	HC	SS038	SS038	Shannon	2.56243
72	HC	SS040	SS040	Chao1	56	0			72	HC	SS040	SS040	Observed	56				72	HC	SS040	SS040	Shannon	2.78847
73	HC	SS041	SS041	Chao1	52	0			73	HC	SS041	SS041	Observed	52				73	HC	SS041	SS041	Shannon	2.61639
74	HC	SS042	SS042	Chao1	54	0.165116			74	HC	SS042	SS042	Observed	54				74	HC	SS042	SS042	Shannon	2.4467
75	HC	SS043	SS043	Chao1	54	0.495349			75	HC	SS043	SS043	Observed	54				75	HC	SS043	SS043	Shannon	2.56276
76	HC	SS048	SS048	Chao1	53	4.62255			76	HC	SS048	SS048	Observed	50				76	HC	SS048	SS048	Shannon	2.19258
77	HC	SS050	SS050	Chao1	66	0			77	HC	SS050	SS050	Observed	66				77	HC	SS050	SS050	Shannon	2.67433
78	HC	SS054	SS054	Chao1	58	0.247835			78	HC	SS054	SS054	Observed	58				78	HC	SS054	SS054	Shannon	2.54061
79	HC	SS058	SS058	Chao1	56	0.123879			79	HC	SS058	SS058	Observed	56				79	HC	SS058	SS058	Shannon	2.41154
80	HC	SS059	SS059	Chao1	57	0.495595			80	HC	SS059	SS059	Observed	57				80	HC	SS059	SS059	Shannon	2.52111
81	HC	SS062	SS062	Chao1	58	0.165224			81	HC	SS062	SS062	Observed	58				81	HC	SS062	SS062	Shannon	2.73157
82	HC	SS064	SS064	Chao1	54	0.247674			82	HC	SS064	SS064	Observed	54				82	HC	SS064	SS064	Shannon	2.56071
83	HC	SS065	SS065	Chao1	49	0.0989743			83	HC	SS065	SS065	Observed	49				83	HC	SS065	SS065	Shannon	2.48034
84	HC	SS067	SS067	Chao1	44	0.494286			84	HC	SS067	SS067	Observed	44				84	HC	SS067	SS067	Shannon	2.35284
85	HC	SS068	SS068	Chao1	47	0			85	HC	SS068	SS068	Observed	47				85	HC	SS068	SS068	Shannon	2.4705
86	HC	SS070	SS070	Chao1	59	4.62675			86	HC	SS070	SS070	Observed	56				86	HC	SS070	SS070	Shannon	2.1966
87	HC	SS071	SS071	Chao1	53	0.123815			87	HC	SS071	SS071	Observed	53				87	HC	SS071	SS071	Shannon	2.24767
88	HC	SS074	SS074	Chao1	50	0.164992			88	HC	SS074	SS074	Observed	50				88	HC	SS074	SS074	Shannon	2.54407
89	HC	SS079	SS079	Chao1	49	0.494872			89	HC	SS079	SS079	Observed	49				89	HC	SS079	SS079	Shannon	2.41031
90	HC	SS080	SS080	Chao1	49.5	1.02631			90	HC	SS080	SS080	Observed	49				90	HC	SS080	SS080	Shannon	1.5254

## Sheet: Beta diversity (MWvsHC)
Beta diversity of Bray-Curtis for MW and HC generated from MicrobiomeAnalyst2
	Axis.1	Axis.2	Axis.3	Axis.4	Axis.5	Axis.6	Axis.7	Axis.8	Axis.9	Axis.10	Axis.11	Axis.12	Axis.13	Axis.14	Axis.15	Axis.16	Axis.17	Axis.18	Axis.19	Axis.20	Axis.21	Axis.22	Axis.23	Axis.24	Axis.25	Axis.26	Axis.27	Axis.28	Axis.29	Axis.30	Axis.31	Axis.32	Axis.33	Axis.34	Axis.35	Axis.36	Axis.37	Axis.38	Axis.39	Axis.40	Axis.41	Axis.42	Axis.43	Axis.44	Axis.45	Axis.46	Axis.47
H33	0.016096	-0.28277	-0.1695	-0.26668	-0.071267	-0.063073	0.088936	-0.0070823	0.072026	0.077971	0.072784	0.0055114	-0.012477	-0.050313	-0.020417	-0.0020749	0.017873	-0.036601	-0.024879	-0.013117	0.040349	-0.055796	-0.027826	0.040179	-0.023407	-0.070594	-0.0080974	-0.0088811	-0.001004	0.022977	-0.0044818	-0.0035185	0.036049	-0.0097377	0.013866	0.011333	0.037291	-1.9289e-07	0.017942	-0.0002866	-0.011764	0.0053688	0.014256	-0.0034241	0.008524	-0.0057188	-0.0010813
H34	0.032373	-0.29755	-0.097099	0.04231	-0.008571	-0.098547	-0.12214	0.014732	-0.18787	-0.066858	-0.021209	-0.013879	-0.042786	0.048374	0.080669	0.026038	0.12704	-0.0068867	0.011695	-0.073928	0.032833	0.0061426	-0.04925	-0.018667	-0.0094454	0.025346	0.030867	0.055619	-0.028444	-0.0083474	0.0014555	0.018831	0.043624	0.035316	-0.003949	-0.027792	-0.00080818	0.0084061	-0.0075827	0.011384	0.030717	-0.026114	0.0034562	0.0016183	-0.0025297	0.0048215	-0.0046648
H35	0.043409	-0.069287	0.27428	0.062237	0.0030325	-0.13624	0.15873	0.12931	-0.12068	-0.017086	-0.024846	-0.1993	0.00149	0.017403	-0.048708	0.025846	0.058119	0.021942	0.013176	0.027129	0.046445	-0.043505	-0.075203	-0.0043112	0.0097312	0.028909	0.038193	0.019716	-0.0046567	0.044741	-0.0021525	0.018142	-0.018754	0.0010467	0.015868	0.028829	-0.0013606	0.024117	-0.00081732	0.02435	-0.010755	-0.013804	0.014177	-0.0060994	0.0094851	-0.001476	0.0044431
H36	0.015205	-0.16484	0.074929	0.12804	-0.036389	-0.072615	-0.0013003	0.054751	0.10714	0.20125	0.08069	-0.087792	-0.045845	0.053544	-0.055013	0.077064	0.042162	0.0053233	-0.061592	-0.039568	-0.079101	-0.037178	-0.016948	-0.047718	0.027975	-0.026076	0.01425	0.0026089	-0.0097058	0.014529	0.033131	0.011234	-0.027131	0.0027787	-0.033547	-0.04403	0.0085309	-0.010228	0.017471	-0.017608	-0.0058187	0.0039808	0.0093012	0.0054504	-0.014061	0.0023573	0.0030841
H37	0.27901	-0.0084529	-0.060753	0.083437	0.0092917	-0.030323	-0.18536	-0.0098236	-0.2531	-0.0024988	-0.0022158	-0.12134	-0.035265	-0.034792	-0.061032	-0.060422	-0.071771	0.019312	0.039532	-0.0038765	-0.013057	0.04116	-0.034546	0.00052032	0.017148	-0.046763	0.019482	-0.016837	-0.024818	0.027353	0.010416	-0.020422	0.019984	-0.0012597	0.017073	-0.0033053	0.016802	-0.024604	-0.028749	0.0017311	0.0005987	-0.0077991	-0.012169	-0.01548	-0.0090962	-0.0019717	0.0119
H38	-0.10522	-0.059504	0.097213	-0.011581	0.079585	-0.024999	-0.10416	0.17996	-0.04543	0.027296	-0.0024172	0.033634	-0.027851	-0.046552	-0.032964	0.028116	-0.014382	0.0028904	0.059203	0.021353	0.007927	-0.04975	-0.03589	-0.00019129	0.031873	0.0039666	0.077602	0.00070562	0.0088501	0.016818	-0.039171	0.030367	0.016601	-0.026957	0.0077463	-0.028356	0.0037975	0.0033647	-0.016645	-0.027766	-0.023211	0.02499	0.036556	0.0072243	0.0073927	-0.0055203	0.0076568
H39	0.072387	-0.18672	-0.42192	0.14368	0.26593	0.015856	0.18207	0.018394	0.046714	0.11295	-0.032515	0.0046884	0.054054	0.083163	-0.010942	-0.0134	-0.0080696	0.017066	-0.070929	0.045064	0.059313	-0.056402	0.023571	-0.002273	0.0088276	-0.011724	-0.017182	-0.020387	0.026862	0.017265	-0.011869	0.029337	0.014987	0.0024266	0.00081198	0.0019641	-0.006431	-0.013666	-0.021533	-0.0028694	-0.008904	-0.001211	-0.0061743	-0.0055039	0.0018657	-0.0012344	-0.00010362
H40	-0.0019024	-0.25578	-0.26166	-0.049229	0.0031087	-0.22763	0.13967	0.048741	0.084885	-0.081033	-0.099936	-0.013492	0.024358	0.037447	-0.044174	0.068421	0.0030703	0.076476	0.08378	0.02772	0.017331	0.0073649	0.008689	-0.0037721	0.053126	-0.016414	-0.023357	-0.011115	0.044815	-0.022396	0.027976	0.017236	0.0054916	0.0062508	-0.0013425	0.035175	0.0035519	-0.031051	0.0081181	0.024099	0.0025226	-0.0094525	-0.0079568	0.0022333	-0.018215	-0.0021179	0.003935
H41	-0.19445	0.21202	-0.080674	-0.15811	0.074696	-0.026794	-0.074301	-0.024802	0.038117	-0.030206	0.026375	-0.032669	0.00025763	-0.049512	0.031512	0.014599	-0.097811	-0.011525	0.04154	-0.0025987	-0.11876	0.059868	0.028976	-0.0084396	0.084184	0.019701	0.029773	-0.014813	-0.016974	-0.044261	0.022792	0.032335	0.020031	0.01258	-0.013232	0.021293	0.011651	0.010172	-0.0071258	-0.019447	0.018777	-0.0054481	0.00072739	-0.0025283	0.0087611	-0.0072446	0.0045807
H42	-0.0050197	0.22236	-0.040725	0.068894	-0.10917	0.0045183	-0.10158	0.047035	-0.084426	0.02166	-0.069751	-0.039979	-0.038609	-0.065675	-0.052988	-0.0473	0.012703	0.12127	-0.0035549	0.027075	-0.025909	-0.042862	-0.0075845	0.025442	-0.01994	0.039623	-0.0096969	0.028677	-0.002281	-0.025895	-0.021254	0.04472	-0.017496	-0.0015873	-0.0028746	-0.0044232	0.015137	-0.0094969	-0.03126	-0.040474	-0.025032	-0.019772	-0.013836	0.0095823	0.0093467	-0.008709	-0.00050702
H43	0.03838	-0.19118	-0.0772	-0.13834	-0.0045623	-0.16427	0.113	0.055764	0.011251	-0.087658	-0.15359	0.015208	0.049791	-0.088052	0.02551	-0.0077653	-0.047098	-0.014683	-0.082291	0.0058172	-0.078647	-0.0036568	0.027796	-0.021992	0.031127	0.022137	0.023433	0.022378	0.0090847	0.031869	0.01607	-0.02799	-0.015492	0.0030353	0.016377	-0.0019504	-0.019309	0.016167	-0.0206	-0.0014997	-0.0082817	0.013098	-0.0087899	-0.0024293	0.012657	-0.0091884	-0.013902
H44	-0.082087	-0.15338	-0.0074697	0.019716	-0.018518	-0.027711	-0.11492	0.020904	-0.047467	-0.043928	-0.055262	0.088194	0.042391	0.012248	0.065782	0.043615	-0.044535	0.083451	0.09106	0.034327	-0.02137	-0.0011259	0.023387	0.0094994	0.017847	-0.036216	-0.027023	-0.078543	-0.026669	0.038111	0.031154	0.049142	-0.045862	0.020736	0.011736	0.046448	-0.017837	-0.027196	0.040779	0.009849	0.0017819	-0.0056662	0.019015	0.018718	-0.0040297	0.0026107	-0.0053723
H45	0.11907	0.06789	0.056816	0.075531	-0.2233	-0.1527	0.23294	-0.1868	-0.20097	-0.029023	-0.16397	0.051301	-0.094564	0.10228	0.12779	-0.051908	-0.1051	-0.085513	0.086937	-0.014133	-0.010484	-0.068623	-0.00073235	-0.016746	0.025529	-0.035136	0.016241	0.0081946	-0.034925	-0.022432	0.031006	-0.00064542	-0.014049	-0.059029	0.018571	-0.01736	-0.001449	0.016115	0.014628	-0.019286	-0.0076967	0.0097054	0.0035506	-0.00084972	-0.010643	9.707e-05	-0.010377
H46	0.044822	-0.14185	-0.32288	-0.05571	0.073709	-0.1944	0.082087	0.11204	0.052883	-0.013889	-0.14629	-0.089539	-0.034626	-0.057083	-0.098668	-0.07452	0.037538	-0.0093295	0.062154	0.021787	-0.046256	0.069884	-0.010717	0.015264	-0.0068133	-0.029797	0.020793	-0.0096917	-0.015608	-0.057548	-0.03094	-0.0063026	-0.031343	-0.019334	-0.039689	-0.027902	-0.0169	-1.9225e-05	0.0094634	-0.0077694	-0.0030424	0.00086336	0.002248	-0.0081176	-0.0033004	0.0083842	0.0072977
H47	-0.23867	0.20376	-0.088197	0.037716	0.13137	-0.046263	-0.13939	-0.12058	0.043195	0.083599	-0.074105	-0.06843	0.037071	0.13329	0.073186	0.054515	0.03998	0.0075645	0.0058212	0.051241	0.040807	-0.012324	0.015592	-0.0063253	0.0048217	0.030735	0.051969	-0.035833	-0.015151	0.0097494	-0.016483	-0.0097152	0.028487	0.011194	0.019818	0.0064328	0.031121	-0.016249	0.0026848	-0.0045001	0.0057131	-0.0034583	-0.0015747	0.025998	0.013302	0.0006231	0.0041997
H48	-0.08834	0.052273	0.14894	0.053119	0.047813	-0.13809	-0.032214	0.1051	0.044072	0.060685	0.03988	0.034061	-0.039527	-0.019805	0.027526	-0.021201	-0.020962	0.11939	-0.059301	0.014823	0.034643	0.023127	0.0057896	0.013256	-0.020259	-0.019931	0.0013721	0.036075	-0.020086	-0.054903	0.029862	-0.00091706	-0.01619	-0.00015775	0.032294	0.0036168	0.031492	-0.023864	0.03189	0.0067678	-0.014757	0.042145	-0.014226	-0.017036	-0.0015728	-0.00019167	0.0026203
H49	-0.20854	0.056789	-0.054212	-0.0028725	0.0208	-0.081729	-0.1215	-0.042123	0.023614	-0.031054	-0.015314	-0.0824	-1.067e-05	0.061094	-0.0022293	0.076952	-0.024341	0.080076	-0.02831	-0.030949	0.013963	0.041717	-0.045152	-0.071514	-0.044549	-0.067842	-0.0017531	-0.019191	-0.030098	0.045842	-0.0095851	0.033254	0.031889	-0.016666	0.021407	-0.0032628	0.012675	0.0041715	-0.0098197	0.0069366	-0.0006905	0.0009903	0.011642	-0.015051	-0.0047526	-0.0077224	-0.0065344
H50	0.14104	-0.16505	-0.0137	0.060458	-0.22121	-0.06005	-0.083986	-0.058057	-0.032859	0.047105	0.046954	0.049115	0.0064338	0.18776	-0.047203	-0.023484	-0.0067565	0.03728	0.014781	0.025514	-0.019718	-0.053041	0.069911	0.031338	0.033273	-0.035071	0.039664	-0.025796	0.01229	0.011504	-0.03934	-0.00015259	0.003647	0.018729	-0.0037219	-0.020724	0.0068488	0.0062763	-0.023215	-0.0019981	0.017285	0.024446	-0.0029265	0.013096	0.0092505	0.0011143	0.0072415
H51	0.077705	-0.3818	-0.1689	0.022223	-0.053376	-0.19162	-0.046836	-0.00787	-0.088107	-0.077074	0.19683	0.077894	0.023713	0.056737	0.063559	-0.046226	0.044619	-0.01312	-0.048899	0.023587	-0.058756	0.019037	-0.03681	0.013435	-0.029895	0.04988	-0.0075681	-0.0026712	0.029335	-0.0083898	0.046812	-0.020842	0.013326	-0.038349	-0.00049816	0.018399	0.0091038	0.0061345	-0.0019459	-0.011506	-0.010181	0.0082561	0.0030839	-0.00023345	0.0093916	0.0029292	0.0046745
H52	-0.1765	-0.12055	-0.18312	0.12367	0.10377	0.11915	-0.14075	0.029657	-0.22531	-0.064457	0.1242	0.10508	-0.001647	-0.0056044	0.0079452	-0.049616	0.078721	0.038813	-0.06433	-0.019486	0.0058084	0.013467	-0.0082124	-0.015384	0.0062216	0.026411	0.0075065	0.010295	0.042183	-0.011685	0.050066	-0.016606	-0.0049265	-0.022514	-0.01399	-0.017614	-0.016892	0.0015562	0.023094	-0.0080556	0.0051088	0.0049635	7.9279e-05	-0.0092485	0.0013172	0.0024006	-0.0023118
RAS1	0.36829	0.29136	-0.13762	0.095886	-0.083761	-0.065886	-0.0091813	0.077033	0.032351	0.0078127	0.052728	-0.066312	0.037708	-0.036982	0.063673	0.035521	0.010406	0.02488	-0.017071	0.083167	0.025542	-0.0021306	-0.00082893	-0.036149	-0.030592	0.020614	-0.020367	0.0049732	-0.0030856	-0.051946	0.017343	-0.015228	0.00093992	0.030864	0.031773	-0.0069491	0.039736	0.0067453	0.024466	0.0049168	0.012031	0.012195	-0.0015096	0.001993	0.0066301	0.0042492	-0.0044612
RAS10	0.18789	-0.12971	0.082454	-0.18533	0.064819	0.061225	-0.061986	0.02067	-0.15052	-0.034374	0.020034	-0.035373	-0.024238	-0.097936	0.076029	-0.028393	0.0079306	-0.066549	-0.0068309	-0.021588	0.055802	-0.0073749	0.012519	0.085598	-0.00062545	-0.04703	-0.0039253	-0.037808	0.00066162	-0.060793	0.019526	0.039748	-0.002066	0.019207	-0.0011341	-0.0040627	0.019923	0.012293	-0.0022106	0.012543	-0.015572	0.011962	-0.010805	-0.0027146	0.0051935	-0.0034791	0.0049031
RAS11	0.11885	-0.04432	0.016957	-0.17203	0.0018192	0.2495	0.12265	-0.11672	-0.14383	0.13653	-0.10815	-0.079636	0.046114	-0.067667	0.0054745	0.096742	0.05931	0.075471	-0.03436	0.0051747	-0.091473	-0.016037	-0.004121	-0.038444	-0.024615	-0.03093	0.010696	0.027569	0.0052595	0.045763	0.023576	0.0091429	0.031078	-0.0022152	0.0055571	-0.013347	0.010385	0.0055894	0.0077312	0.0074158	0.010771	0.015179	0.00090363	0.0033466	0.012374	5.6395e-05	0.0022624
RAS12	0.13817	-0.14509	0.11101	-0.26806	-0.086765	0.0687	0.062955	-0.046668	-0.032869	-0.074447	-0.027357	0.005946	0.0591	0.058759	0.026068	0.12073	-0.046529	-0.044613	-0.15107	0.055449	0.060891	0.070374	-0.073957	-0.05343	0.062083	0.0021149	0.021594	-0.029327	0.015788	-0.062027	-0.027484	0.00050449	-0.01711	-0.021293	-0.012066	0.023039	-0.016803	-0.046573	0.0026418	-0.010363	0.029061	-0.0033693	-0.0067023	0.0020264	0.0066734	0.012174	0.0051456
RAS14	0.18193	-0.20142	0.085047	-0.2316	-0.044078	0.036257	0.0070988	-0.13274	0.051245	0.027664	0.18945	0.033142	0.0089364	-0.054984	-0.0076793	0.032303	0.023706	-0.013069	0.01513	0.05491	-0.057271	-0.048121	0.0071955	0.0016694	0.013468	-0.034219	0.0018699	-0.0001944	-0.034723	0.026905	-0.010303	-0.0038215	-0.0018857	0.032323	0.025641	-0.0022532	-0.020682	-0.00065828	-0.002915	-0.00089906	-0.0085745	0.0021174	0.0078658	-0.015773	-0.013399	0.0031106	0.00016301
RAS15	0.36705	0.31274	-0.15379	0.080832	-0.15257	-0.032789	0.0034644	0.075892	0.0097986	-0.026737	0.07693	-0.048196	0.024002	-0.045485	0.0071773	0.07075	0.060694	0.019323	-0.046737	0.038254	0.027539	0.067341	0.0056283	0.0056928	0.016605	-0.061633	0.013579	-0.010572	-0.0027478	-0.03591	0.021678	-0.017564	0.02679	0.013195	0.038152	-0.0052946	-0.048541	0.048627	-0.015507	0.0095834	-0.011018	-0.014496	-0.0026617	-0.0057365	0.0067153	-0.0039164	-0.0066232
RAS16	0.010907	-0.0060002	0.15085	0.11014	-0.019575	0.14534	0.12627	0.021673	0.074984	-0.077247	-0.02558	-0.007723	0.08659	0.10772	0.022717	-0.018736	0.099462	0.01381	0.068506	-0.052025	-0.060561	-0.0081758	0.011767	0.010367	0.025243	-0.021434	-0.048723	0.0077984	0.014889	-0.022186	0.013572	-0.0029525	0.032572	0.0016819	-0.052096	-0.0069523	0.054876	0.015648	-0.020326	0.043969	-0.0013287	0.0029893	-0.0027027	-0.024338	0.0096882	0.0010985	-0.00088007
RAS17	0.23604	-0.011893	0.13426	-0.091902	0.15464	-0.055341	0.0030233	-0.067968	0.061046	-0.059797	0.0074232	-0.013192	-0.058834	-0.032114	-0.05377	-0.0048891	-0.039209	0.034727	0.0050397	-0.031277	0.0077687	-0.020959	0.031655	-0.050809	-0.028161	0.028713	-0.054314	0.029163	-0.017305	-0.032739	-0.0034166	0.015401	0.0049984	0.013162	-0.029	0.025159	0.030194	0.0035556	-0.011569	-0.024027	-0.021968	0.019129	0.022184	-0.0078333	-0.0014036	0.019131	-0.010952
RAS18	0.12682	0.1589	0.092832	-0.13447	-0.11569	0.076018	0.066718	0.14525	-0.018271	-0.0068351	0.0008056	0.02595	-0.053583	0.046899	0.011418	0.035102	-0.02028	-0.056207	0.016132	0.047503	-0.038942	-0.078395	0.02288	0.012697	-0.075334	-0.016094	-0.020434	-0.046705	0.018912	-0.031969	0.050987	0.015773	-0.0020036	-0.0079106	-0.036582	-0.0022373	-0.0084493	-0.020314	-0.028836	0.012963	-0.00081463	-0.038386	0.0062864	0.009127	0.0095284	-0.0076437	0.0099215
RAS19	-0.040167	-0.12145	0.011367	-0.14603	-0.050104	0.11251	-0.028298	0.064857	0.12432	0.010165	0.018332	-0.025753	0.0015696	-0.026177	0.010701	-0.057039	-0.02161	0.01839	-0.018955	-0.05161	0.045267	-0.025605	-0.010976	-0.014102	-0.041398	-0.041461	0.061153	0.018971	-0.01866	0.01361	0.03042	0.014914	-0.011959	-0.052018	-0.059076	0.030298	-0.0065571	0.0018707	0.01153	0.027226	0.021719	-0.0048186	-0.0028176	0.010917	0.017558	-0.00033118	-0.012399
RAS2	0.33574	0.29575	-0.18509	0.10764	-0.14592	0.0075691	-0.0068007	0.039224	0.053771	0.12366	-0.027232	0.03742	0.015249	-0.14831	0.14934	0.039536	-0.018494	-0.12019	6.2198e-05	-0.023554	-0.0092924	-0.032968	-0.018799	0.0017718	0.023011	0.02133	-0.023943	0.027914	0.019067	0.015121	-0.061335	0.01998	0.0019194	-0.0029447	-0.016309	-0.0055422	0.007553	0.0080158	0.016243	0.018417	-0.0039252	-0.0050632	0.015573	0.010724	-0.0046621	0.003984	0.0072311
RAS20	0.26371	-0.021636	0.12082	-0.063979	0.14154	-0.064083	-0.0184	-0.097281	0.072724	-0.068935	0.031292	-0.014362	-0.070249	-0.019854	-0.07054	-0.025807	-0.057725	0.015838	-0.0054804	-0.047188	0.057668	-0.01019	0.01342	-0.033647	-0.034368	-0.022641	-0.045341	0.046264	0.032178	-0.010817	-0.020203	0.020187	0.02568	-0.0069475	0.019967	0.0012159	0.010975	0.020494	0.020978	0.0080205	0.010741	-0.025714	-0.00061129	0.024625	0.0003656	-0.018104	0.00094593
RAS21	0.11099	-0.11197	0.092116	-0.027398	0.021613	0.019465	-0.11232	0.026203	0.11461	0.011659	-0.038601	-0.05439	0.05978	0.0021712	0.13783	-0.043377	-0.064842	0.053507	0.00010875	0.012357	0.01944	-0.036241	0.033842	-0.013176	-0.0091691	0.071944	-0.022533	-0.0034863	0.0078126	0.034939	-0.0021242	-0.053499	0.047883	-0.018638	0.034714	0.0056825	-0.013565	0.0048666	0.018766	-0.013887	-0.014764	-0.014109	-0.021671	-0.0010439	-0.0012387	0.010667	0.012455
RAS23	0.13856	-0.11884	-0.075385	0.17992	0.11176	0.27577	0.12185	0.0041294	0.12526	-0.16137	0.089004	-0.12619	-0.068891	0.013152	0.011136	-0.004994	-0.040364	-0.047181	0.014203	0.048065	-0.019627	-0.0019344	0.0014859	0.052929	0.039349	-0.0090016	0.0094643	0.028765	-0.067558	0.011046	-0.0108	-0.006422	0.036923	-0.030038	0.014816	0.002533	0.027374	-0.002854	0.0044419	-0.010965	0.026097	0.019969	-0.0007957	0.0080396	-0.0089506	-0.0010272	0.013036
RAS25	0.21354	0.003206	0.021855	-0.049038	0.20958	-0.03004	-0.1326	0.079014	0.037496	0.029324	0.018719	0.065967	-0.011183	0.032766	-0.017921	-0.046094	-0.061387	-0.05808	0.055559	0.063569	-0.047539	-0.02389	0.04155	-0.036121	0.0024894	0.016971	-0.0046086	-0.03847	0.017507	0.012225	-0.031225	0.01657	-0.00075442	0.026683	0.010888	-0.037595	0.012642	-0.024652	0.0044138	0.013299	0.049897	-0.012507	0.0021391	-0.023336	0.0042231	-0.0035947	-0.00976
RAS26	-0.06581	0.1102	0.0018101	-0.080834	0.13253	0.047141	-0.17291	0.063481	0.099984	-0.10932	-0.061833	-0.073646	-0.0046539	-0.10274	-0.020907	-0.080083	0.032512	0.039166	0.0033901	0.043601	-0.030698	-0.011426	0.034992	-0.0068221	0.098947	-0.00052754	0.028917	0.010513	-0.0083813	0.026977	0.038041	-0.00377	-0.019977	-0.024069	0.0017117	-0.018187	-0.00851	0.02304	0.010819	0.014026	-0.0016857	-0.0035397	0.00035809	0.0061229	0.0054324	0.010272	-0.0096931
RAS27	0.099288	-0.23627	0.010342	0.17632	0.044211	0.11994	0.05674	-0.027761	-0.061903	-0.10499	0.030829	-0.04132	-0.013895	-0.085685	0.091564	0.067042	-0.14186	0.071846	-0.0062048	0.017698	-0.027852	-0.00048715	0.014831	0.055953	-0.029795	0.0060877	0.021861	-0.021862	-0.00039628	0.005056	-0.010148	0.024118	-0.016928	0.037444	-0.010644	-0.01956	-0.029519	-0.00627	-0.017381	0.0033462	-0.0046191	-0.010298	0.0013785	-0.0035069	0.011262	0.0092176	-0.0050244
RAS28	0.42119	0.34757	-0.053944	0.049929	-0.028588	-0.096633	0.059327	-0.090956	-0.01148	-0.13787	0.063214	0.078215	-0.020931	-0.077515	-0.11012	0.048976	0.050251	0.032999	0.0076405	-0.044217	0.019145	-0.046413	0.016206	0.0023849	-0.0011189	0.028902	0.012683	-0.00082755	0.02957	0.037013	0.0207	0.0075881	-0.005636	0.017633	-0.037362	-0.008033	0.012481	-0.050357	0.0050068	-0.037767	0.0077844	0.016634	-0.0034138	0.0057805	0.0085731	0.0042045	-0.0047866
RAS3	0.18755	-0.10816	0.06708	0.027682	0.12163	-0.041816	-0.1617	-0.14425	0.06177	-0.15429	0.0067133	0.14481	-0.016413	0.015402	-0.072818	0.064323	-0.0034534	0.032535	0.079036	-0.023057	0.014313	0.027642	-0.020803	0.027193	-0.059843	0.0045754	0.031055	-0.032402	0.019768	0.028728	-0.014646	-0.031267	-0.025673	-0.030513	-0.0243	-0.0096061	0.012666	0.037229	-0.0019474	0.0065698	-0.0075422	-0.0035967	-0.0063929	0.0029148	0.0014428	-0.0066257	0.0078245
RAS30	0.042013	0.20018	0.16459	0.10103	0.23718	-0.040613	0.1767	0.10248	-0.036095	0.20299	0.047687	0.059774	0.17599	0.037451	0.065786	-0.090257	0.016554	0.039673	-0.01247	0.0068011	-0.0014523	0.011542	-0.0067717	0.035426	-0.010982	-0.010852	0.019516	-0.018793	-0.013053	-0.016029	0.00069425	0.033318	-0.018588	-0.017872	-0.02185	-0.023022	-0.013852	-0.024556	-0.014678	-0.0043147	-0.01133	-0.0003873	-0.0029433	-0.0009058	-0.0045761	-0.0068235	0.00020642
RAS31	0.16509	-0.068218	0.025329	0.095534	0.19286	0.0047021	-0.132	-0.0040371	-0.15125	0.072314	0.033811	-0.0081118	0.045119	-0.026052	0.08587	-0.053064	0.016458	-0.051779	-0.01186	0.026454	-0.01469	-0.011413	0.000443	-0.012034	0.013969	0.03646	-0.052456	0.03016	-0.036601	-0.016703	0.014919	-0.012075	0.014588	-0.015306	-0.055018	0.033982	0.012706	-0.0065268	0.02205	0.012328	0.01165	-0.0017378	0.012703	0.028328	-0.013722	-0.0064301	-0.0054935
RAS32	-0.054531	0.058084	-0.0075419	-0.23561	0.04983	0.21274	-0.016023	-0.10158	-0.041156	0.017782	0.07132	0.10907	-0.033382	-0.06661	-0.035165	-0.00029201	0.083871	0.034927	0.043701	0.077319	0.0033179	-0.060796	0.013364	-0.024335	0.053642	-0.0023013	-0.0046639	0.059251	-0.0070871	-0.00684	-0.019193	0.020483	-0.0086374	-0.0083793	0.020469	0.032189	-0.010438	-0.012536	-0.0079164	0.014429	-0.008363	-0.0092141	-0.0050701	-0.01905	-0.015001	-0.009035	0.002162
RAS33	0.19543	0.077708	0.1809	0.032297	0.17331	-0.083004	-0.035959	-0.078651	0.09913	-0.042681	-0.14408	0.041466	-0.13919	0.043982	-0.025315	0.10011	0.14594	-0.075745	-0.045616	-0.012006	-0.05183	-0.015821	-0.031583	0.040298	0.015532	-0.022673	-0.0076307	-0.011394	-0.016057	-0.037269	0.015783	-0.024963	0.0056584	0.02145	0.010811	-0.0017011	-0.02782	-0.0042168	0.00075577	-0.014124	-0.0038669	0.0082892	-0.0029155	0.016165	0.003913	0.00037818	-0.00043925
RAS35	0.075297	0.21907	0.032516	-0.14767	-0.043755	0.14191	-0.019948	0.045834	0.055586	-0.016311	-0.047457	0.010058	-0.048532	0.10737	0.054951	-0.13044	-0.090941	0.025116	-0.037673	0.0018547	-0.004571	-0.032957	-0.059556	-0.016302	-0.032499	-0.016109	0.079112	-0.021364	0.025531	0.0030253	0.027525	-0.047656	0.0082987	0.034564	-0.00038434	0.046513	0.01258	0.0047579	0.011474	-0.0077004	-0.010044	0.024752	0.0032679	-0.010939	-0.0056627	-2.6674e-05	-0.0029838
RAS36	0.0073206	-0.021555	0.13097	-0.093481	0.096334	-0.15203	0.20912	0.20827	-0.016931	-0.0090597	0.091748	0.065915	0.041589	-0.013495	0.050803	0.032797	-0.012095	0.046082	0.075603	-0.10837	-0.055819	0.025064	0.0033366	0.0081207	0.01887	0.040727	-0.0030121	-0.027652	-0.017726	0.016195	-0.02377	-0.039874	-0.0061876	0.018429	0.031428	-0.017471	0.020291	0.030145	0.023753	0.014544	0.014529	0.0056508	-0.0055094	0.014506	0.0090258	0.0011246	-0.0019112
RAS4	0.24266	0.12236	-0.10415	-0.18079	-0.077353	0.15244	-0.047936	0.046191	-0.091422	0.031469	-0.057509	-0.016665	0.10497	0.17398	-0.21745	0.017269	-0.071119	0.019709	-0.066358	-0.05976	-0.0057802	-0.058146	0.029335	0.090677	0.04878	0.10329	-0.023962	0.011162	-0.027335	-0.020194	0.021073	0.010271	0.01452	-0.014457	0.0097298	0.0038754	-0.0077459	0.020751	0.026265	0.0082372	-0.017197	-0.0055744	0.0057339	-0.0013857	-0.0029253	0.0012695	-1.4012e-05
RAS5	0.32778	0.20353	0.074362	0.048856	0.33013	-0.13649	0.096367	-0.3041	0.056646	-0.010701	-0.044963	0.049305	0.039609	0.016704	0.0045943	-0.086229	0.037278	0.011013	-0.064264	-0.038389	0.00027869	0.0052323	-0.030209	0.0041855	-0.024491	0.007783	0.034816	-0.014324	-0.0126	0.014004	-0.0099867	0.022506	-0.017077	-0.015976	0.022671	0.0057163	-0.034869	-0.00067993	-0.004279	0.02007	0.0026094	-0.0091829	0.0019641	-0.012508	0.0010445	0.0015938	0.0074979
RAS6	0.22312	0.38865	-0.17394	0.098754	-0.15991	0.0080416	-0.0088116	0.072915	0.029526	-0.0071538	0.077937	0.15748	0.032321	0.013676	0.016095	-0.0077815	0.052664	0.027509	0.0089757	-0.0013405	0.028912	0.072101	0.016386	-0.047032	0.02376	-0.053236	0.014017	-0.020398	-0.053737	0.050015	0.0112	-0.0038169	-0.011948	-0.034254	-0.020179	0.034647	-0.0074617	0.026915	-0.017911	0.0021407	0.0060392	0.0075129	0.010282	-0.0012136	-0.0053018	0.0020365	0.0076824
RAS7	0.21474	0.076461	0.011539	0.057099	-0.24498	0.0085427	-0.048964	0.098804	0.076167	-0.12593	-0.023399	-0.092626	0.016408	0.0033422	0.046909	0.067692	0.042987	0.040976	0.012551	-0.050089	0.036869	-0.034049	-0.013054	0.0083638	-0.020913	0.065845	-0.023928	-0.015683	0.0053194	0.043822	-0.036073	-0.010032	-0.017967	-0.014644	-0.023194	0.0064123	-0.0029056	-0.048624	0.0023118	0.00040832	0.0052697	0.0023805	-0.0015333	-0.018982	-0.013386	-0.0068235	-0.0058986
RAS8	0.048981	0.015346	0.011929	-0.037995	0.046721	-0.0017681	-0.10534	0.16079	-0.022353	0.021993	0.0063006	0.064779	-0.071258	0.086042	-0.013496	-0.015895	-0.056331	-0.073886	-0.010574	-0.016923	0.022385	0.006643	0.0088695	-0.084078	0.01594	-0.040463	-0.04417	0.017482	-0.037147	0.037512	-0.018272	0.022121	-0.0024573	0.0042795	0.025418	-0.021411	-0.012976	-0.0029523	0.00051558	0.011422	-0.039497	0.00027979	-0.025925	0.011927	-0.0044776	-0.0014109	0.00037526
RAS9	0.035946	0.014312	0.14217	-0.11445	-0.0317	0.11498	0.076482	0.069776	0.048167	-0.20154	-0.0070533	0.00041902	0.17741	0.064889	0.016276	-0.11451	0.028394	-0.028069	0.042311	-0.00088956	0.0082109	0.050165	-0.075689	-0.037421	0.027613	-0.01787	-0.053157	0.010962	0.0040633	0.017069	-0.019859	0.0018998	0.010863	-0.0047632	0.014359	-0.051021	0.0080299	-0.0035437	-0.0017403	-0.053798	-0.0020063	-0.020637	-0.011307	-0.0023812	-0.0025853	-0.00029391	-0.0025265
SS001	-0.017867	-0.11144	0.084415	-0.029412	-0.08144	0.041301	0.0098016	0.0068435	0.030306	0.053328	-0.075819	0.024135	0.07258	-0.072684	0.0007006	-0.027556	0.0075547	-0.035644	-0.045929	-0.095105	0.029107	0.072851	0.092925	0.023486	-0.020183	0.010989	-0.00093351	0.033585	-0.030944	0.0097295	0.034559	-0.010579	-0.056445	-0.013181	0.043561	-0.013614	0.031335	-0.047224	-0.027317	-0.0023587	0.03576	-0.0030022	0.021514	-0.0074469	-0.0089066	-0.0056375	0.013217
SS003	0.058865	-0.094557	0.13521	0.048688	-0.13877	-0.11426	0.0041469	-0.084485	0.024741	0.086724	-0.020539	-0.082105	0.0042924	0.0068847	-0.03173	-0.11829	0.026876	0.010467	-0.044609	0.035529	-0.024148	0.063379	0.044926	0.024967	-0.013765	-0.014763	-0.019008	-0.012781	-0.03894	0.018759	-0.0061973	-0.016051	-0.0089878	0.017793	-0.019929	0.048722	0.022585	0.026915	-0.014972	-0.0031083	0.0044052	-0.021383	-0.007389	0.005469	0.0079735	-0.0076245	-0.0036344
SS004	-0.22812	-0.042837	0.063599	0.041178	-0.1486	-0.028097	-0.030092	-0.085678	0.13839	-0.038786	0.13855	-0.077646	0.011973	0.038769	0.036533	-0.066644	0.065928	0.023706	-0.009613	0.033951	-0.015193	-0.11115	0.019285	-0.018491	0.025992	-0.010345	0.038967	0.0022803	0.03091	-0.020055	0.0081045	-0.024092	-0.040037	0.023462	-0.0031982	-0.016509	-0.020318	0.024008	-0.0073843	-0.015608	0.018755	-0.016883	0.0043581	0.0048788	-0.014712	-0.0035451	-0.0028363
SS005	-0.2101	0.051685	0.19362	0.0050849	-0.025271	-0.14071	0.0075853	-0.003049	-0.051527	-0.019528	0.064494	-0.022853	0.014517	-0.052919	-0.044056	0.0058788	-0.02084	-0.025036	-0.066056	0.051848	0.0070295	-0.017664	0.010151	-0.0060027	-0.015349	0.0015797	-0.0031951	-0.018271	-0.022893	0.0049904	-0.015226	0.017707	0.014606	-0.052358	-0.010513	0.0023708	0.0227	-0.023603	-0.035781	0.01259	0.0080019	0.0036067	-0.015934	0.0067964	-0.017044	0.0041108	-0.017549
SS006	-0.20779	0.16875	0.097682	0.0019572	0.040865	-0.1298	-0.075654	0.019374	0.077558	-0.023054	0.081394	-0.028736	-0.037418	0.034679	0.042906	0.079591	-0.074406	-0.055181	-0.022931	-0.022009	-0.045042	0.057166	-0.0095552	0.043154	-0.0015319	-0.0019754	0.043699	0.0076595	0.014356	-0.019991	-0.0010525	0.0033186	0.060658	0.011948	-0.052682	0.0047328	0.0030714	-0.012455	0.012609	0.010828	-0.038509	-0.018623	-0.0024349	-0.017084	-0.019733	-0.00034056	0.0028799
SS007	0.096551	-0.19969	0.046991	0.15147	-0.13619	-0.022954	0.067327	-0.14578	0.031968	0.1053	0.13029	-0.10842	0.016694	-0.090933	-0.11341	-0.049313	-0.07701	-0.016292	0.0059822	-0.029111	0.0046629	0.029663	0.022947	-0.068117	0.016683	0.0088499	-0.0035883	-0.034667	0.038743	-0.022982	0.010185	-0.026431	-0.0016375	-0.012703	-0.012557	-0.034148	-0.023372	-0.0041348	0.034457	0.0082133	-0.01316	0.00073028	-0.0056954	0.0068149	0.00041898	-0.0081655	0.0075213
SS008	-0.29926	0.066587	-0.11342	0.017767	-0.0011954	-0.0099885	0.055811	-0.069295	-0.011578	-0.067416	0.05245	-0.018613	0.046527	0.036654	0.0202	0.058744	0.032078	-0.081673	0.0046731	-0.013211	-0.068224	0.024364	0.082298	-0.090091	-0.059482	0.036946	0.041325	0.028505	0.00033307	-0.0082124	-0.025397	-0.0063681	-0.011032	-0.00088668	0.020639	0.017833	0.038069	-0.023474	-0.01687	0.0061215	-0.032973	0.0011599	0.0027783	0.00031984	0.019872	0.0028447	0.0021314
SS009	-0.22201	0.068465	0.0097128	0.17459	-0.012223	0.083143	0.13181	-0.14633	-0.063654	0.01197	0.0019356	0.0080334	-0.10033	-0.045893	-0.014734	-0.05641	-0.035234	0.050757	0.044476	-0.023665	0.097293	0.0055577	0.027103	-0.0099082	0.078513	0.013985	-0.026997	-0.05386	0.01098	-0.029209	-0.0038859	-0.045521	0.045201	0.028327	-0.011941	0.0018016	0.012865	-0.0034108	-0.037843	0.018303	0.0019875	0.0071016	0.014552	-0.0046071	0.0041348	0.00664	-0.0048073
SS011	-0.12094	0.020258	0.13043	-0.023455	-0.022659	-0.10649	-0.0053353	0.054174	0.059202	0.16071	0.040479	0.057281	-0.05497	-0.042184	-0.0061252	-0.02801	-0.059584	0.0060593	0.02761	-0.056253	0.0091109	0.01196	-0.048885	0.039404	0.014035	-0.024733	-0.038368	0.02547	0.021005	0.034245	0.045044	-0.029248	0.040023	0.0052068	0.00952	0.039849	-0.029939	-0.02206	-0.022422	-0.04029	0.022194	-0.022801	0.0079034	0.0023377	0.022141	0.013889	0.0076286
SS012	-0.20454	0.1013	0.078804	0.017385	0.043517	-0.028359	-0.013387	0.089407	0.0036182	-0.062179	-0.0029012	-0.085582	-0.061832	0.015678	0.043166	-0.025905	0.079219	-0.022643	-0.0030062	0.019885	-0.042099	-0.038546	0.067574	0.020273	-0.054124	-0.0094247	-0.027857	0.006064	-0.011381	-0.0062641	-0.0062548	-0.0093484	0.028524	-0.029861	-0.0053879	0.011226	-0.080259	-0.021013	-0.011158	0.0014099	0.017703	0.027879	-0.02384	0.0017616	-0.0010884	-0.0012657	0.0028262
SS013	-0.12601	-0.11181	0.060704	0.046864	-0.22048	-0.032581	-0.0089575	-0.080829	0.10641	0.052985	0.012184	0.097576	0.041893	-0.042131	-0.070218	-0.1053	0.078764	-0.077346	0.04957	0.059699	-0.00093866	0.01968	-0.05285	-0.01642	-0.02472	0.085779	0.0084111	-0.025996	-0.04218	-0.01906	0.021793	0.094562	0.021287	0.030718	0.038431	0.0001759	-0.0038678	0.0056079	0.006022	0.021547	-0.011498	0.0021773	-0.010293	0.00163	0.0061922	0.015048	0.0012285
SS016	-0.22466	0.057095	0.049465	0.0048314	-0.078028	-0.055291	0.0070217	-0.12649	-0.031894	-0.057153	-0.0432	0.00087891	0.081729	-0.047735	0.030295	0.061314	-0.067573	0.041349	0.026082	0.051733	-0.046928	-0.018215	-0.010974	0.0245	-0.075477	0.026686	-0.051671	0.013751	0.016132	0.019381	0.018375	0.0069343	0.018305	-0.018965	0.0069282	-0.025974	-0.029642	0.010115	-0.0046654	0.017437	-0.0021484	0.0077828	0.012192	-0.010384	-0.011311	0.0122	0.010129
SS018	-0.12292	0.078256	0.22307	0.054309	-0.059959	-0.064237	0.08514	0.065114	-0.063888	0.01744	-0.0021936	0.11241	-0.0073817	-0.0050812	-0.011854	0.012139	0.011566	0.027802	0.033853	0.024842	0.00031883	0.0027715	-0.037345	0.024015	0.034644	-0.0083131	0.056804	0.071351	0.071281	-0.017171	-0.0401	0.013439	0.0019677	0.034623	0.0025081	0.030897	0.0054255	-0.0025258	0.02041	0.006352	0.023738	0.0050002	-0.017029	-0.0096682	-0.0039774	-0.011848	0.0058146
SS019	-0.078728	-0.076998	0.052177	0.053382	-0.071297	0.12877	-0.004892	-0.017156	0.040311	0.014784	-0.096085	0.064813	0.015935	-0.059768	-0.03042	0.020695	-0.032056	-0.017131	-0.032716	-0.042245	-0.020511	0.060651	-0.029622	-0.062018	0.01895	0.075573	0.010413	-0.053118	0.035621	0.014781	0.031983	0.022724	0.036033	0.0072125	-0.018141	0.0051431	-0.022789	0.018158	-0.022741	0.0093083	-0.0042503	0.029305	-0.010766	0.014038	-0.0090783	-0.030038	0.0011133
SS020	-0.16493	-0.032521	-0.15581	0.12013	0.028833	0.13734	0.18227	0.051037	0.0014346	-0.057248	0.01802	0.084593	-0.090732	0.0085032	-0.051036	-0.030013	-0.036632	-0.0076561	-0.099721	0.016934	-0.068946	0.030827	-0.072079	0.045905	-0.038034	0.041231	0.024008	0.0082959	-0.077012	0.02936	-0.026485	-0.045001	-0.024367	0.061351	0.0013841	0.016284	0.0026577	-0.0046557	-0.000848	0.001165	-0.0051528	-0.01994	0.016731	0.0067415	-0.014826	-0.0048257	-0.0047587
SS032	-0.20667	0.19702	0.1528	-0.0061758	0.014966	-0.086307	0.021643	-0.024498	-0.17676	-0.035509	-0.0044976	-0.091096	-0.026262	0.0057855	-0.076231	-0.044784	0.0003965	-0.074203	-0.046378	0.10327	0.037678	0.040522	0.0093758	-0.03275	0.024728	0.0092683	-0.045442	-0.014489	0.034177	0.065721	-0.022176	-0.033359	-0.041493	0.03243	-0.034271	-0.00055159	0.0023233	-0.0026178	0.034106	0.013232	-0.0022005	0.0040568	0.010871	-0.0010506	0.0081441	0.0045976	0.0059632
SS034	-0.094653	-0.076107	0.015059	0.087438	-0.026747	0.097299	0.018097	-0.0057729	-0.020819	0.01777	-0.074631	0.076203	-0.0062035	0.041784	-0.0068729	0.0078589	-0.012491	0.016723	-0.022984	0.03101	-0.032383	0.052988	0.027865	-0.049168	0.0081403	-0.047626	-0.038828	0.066321	0.020374	0.00060645	-0.049338	0.044539	0.01964	-0.0099126	-0.040519	0.0096557	-0.0090252	0.030183	0.015862	-0.025227	0.0037918	-4.0434e-06	0.012265	-0.008911	0.0091738	0.011866	0.0037222
SS035	-0.010553	0.12323	-0.076826	0.10013	-0.073306	0.11079	-0.071875	0.018439	-0.0035517	0.058796	-0.062647	0.032281	0.017802	0.019792	-0.14217	-0.049671	-0.051055	0.013138	0.045419	-0.0070356	-0.085961	0.0227	-0.062141	-0.0056436	-0.066539	-0.060724	-0.012705	0.053694	0.045437	-0.034171	0.0038251	-0.040534	0.021001	0.0043146	0.040241	-0.015279	-0.007125	-0.040466	0.0016619	0.034563	0.019279	0.0036225	-0.001474	0.023574	-0.0048727	0.011987	-0.0098932
SS036	-0.19095	0.015909	-0.037877	0.15146	-0.012786	0.11909	0.13783	0.018229	0.089751	-0.12191	0.097543	0.030948	-0.15812	0.034659	0.048792	-0.0036499	-0.078966	0.022483	-0.052648	0.012511	0.054918	0.018766	-0.0066029	0.027882	0.016391	-0.00094793	-0.012438	0.040314	0.021314	0.025459	0.018013	0.069553	-0.034052	-0.012768	0.012948	-0.041157	0.0046141	-0.0040087	0.00059223	0.01982	-0.0043951	-0.0043395	-0.01423	0.016616	0.014764	0.001963	0.0012886
SS038	0.16354	-0.11244	0.00073161	0.087436	0.06739	0.15181	-0.11259	0.033163	-0.0020477	-0.046803	0.0097276	-0.1107	0.028479	0.068811	0.054782	-0.036829	0.022984	-0.068872	0.048382	-0.076633	-0.014957	0.022799	0.021127	-0.012962	-0.0041469	-0.024559	-0.016659	0.032245	0.077898	-0.015647	-0.020354	-0.0053301	-0.075245	0.026646	0.032789	0.056767	-0.032437	-0.006378	-0.023492	0.0098677	-0.030559	0.017548	0.017756	0.0048303	0.00054398	-0.00034142	0.0024923
SS040	0.0010306	-0.11592	0.12129	0.010952	-0.057226	0.02542	-0.017675	-0.00074112	0.023678	-0.054836	-0.12254	0.055422	0.11016	-0.01217	0.0040079	0.00014271	0.021862	-0.021293	-0.023064	0.10482	0.083094	0.080904	0.10686	0.082532	-0.054593	-0.039651	0.049518	0.037242	0.02837	0.015209	0.011052	-0.014129	0.04194	0.029563	-0.0128	-0.036413	0.0042954	0.0078329	0.022541	-0.019648	-0.012475	0.00072421	0.02289	0.010709	-0.011148	-0.0074854	-0.0065585
SS041	-0.1336	-0.045363	0.01285	0.13125	-0.046905	0.18097	0.0039383	0.030977	0.067864	-0.019578	-0.096342	-0.068629	-0.052999	-0.045437	-0.0067825	-0.077887	0.09905	-0.02534	0.028151	-0.063764	0.032758	0.0064033	-0.020998	-0.011863	-0.027172	0.0095647	0.02106	-0.084557	-0.0018424	-0.013917	0.0099976	0.052775	0.02834	0.0042221	0.016057	0.012192	-0.011931	-0.016276	0.037856	-0.024033	0.0019084	0.005063	0.016621	-0.0096697	-0.0017472	0.0025822	-0.00045964
SS042	-0.19823	0.19623	-0.17603	-0.18795	-0.041358	-0.055932	-0.02538	0.028972	-0.052052	0.0027043	-0.03496	0.012329	-0.079257	-0.014382	-0.0030562	-0.07369	-0.011562	-0.053302	-0.067201	-0.08562	0.018233	-0.044314	0.059999	0.01101	-0.030481	0.012393	0.065925	-0.019429	0.024723	0.026077	-0.046543	0.0059775	0.0055621	0.002263	-0.0056737	-0.024428	-0.0085669	0.01485	0.021202	0.021482	0.02359	-0.0042783	-0.0059674	-0.019764	-0.00093734	0.0092212	0.0043901
SS043	-0.13563	-0.087454	0.048935	0.051613	-0.066162	0.057718	-0.086829	-0.043261	0.031091	-0.008184	-0.082661	0.058968	0.0123	-0.074556	-0.0052785	0.036237	0.038479	0.0045546	-0.012256	-0.014905	0.010367	-0.014618	-0.0053112	0.011445	0.043139	-0.0067847	0.076068	0.0014778	0.00087521	-0.035413	-0.015905	-0.043834	-0.033538	-0.045167	0.01963	-0.0031717	0.049492	-0.013327	-0.013548	0.014013	-0.023641	-0.024767	-0.011942	0.014995	-0.0057294	0.012071	0.0026163
SS048	-0.010673	-0.071418	0.11907	0.1475	0.10101	0.090547	0.14003	0.15633	-0.067046	0.065542	0.063317	0.018104	-0.024043	-0.022159	-0.10748	0.099249	0.0055758	-0.029161	0.053339	0.024801	0.029107	0.0069977	0.063113	-0.021292	-0.037834	0.038331	0.03487	-0.034835	0.013019	-0.031797	-0.040135	-0.025854	0.020699	-0.058514	0.041479	0.044694	-0.019798	0.037344	-0.00034781	-0.018225	0.021433	-0.0064998	0.0041667	-0.00087119	-0.0096811	0.0064201	-0.0088464
SS050	-0.14882	0.086349	0.10603	-0.098607	0.019439	-0.041304	-0.044566	0.060876	0.023266	0.023909	0.0024662	0.016648	-0.082034	0.072832	0.013897	0.049769	0.004112	0.020282	-0.079478	-0.043921	0.031821	0.029372	0.045126	-0.015385	0.032322	0.01795	-0.055045	-0.0086505	0.016413	-0.026214	0.056342	0.014558	-0.013561	0.0099903	0.031806	-0.039054	-0.0041054	0.024893	-0.027064	0.0052454	0.0070832	-0.0084567	0.032897	-0.0043746	-0.012542	0.0047286	-0.00039216
SS054	-0.050348	-0.12172	-0.069474	-0.19531	-0.0038929	0.041415	0.071762	0.053705	-0.033729	0.0085482	-0.027989	0.039321	-0.014779	-0.0063793	0.0052053	-0.005788	-0.020083	0.073993	0.047588	-0.02305	0.072782	-0.020677	0.042338	-0.095463	-0.069086	0.01094	0.010016	0.015774	-0.062431	-0.045375	-0.011993	-0.017076	-0.017273	0.05215	-0.045017	0.0031863	-0.01577	0.024075	-0.0091207	-0.0144	-0.0052551	-0.007164	-0.018171	0.011087	-0.010626	0.0068721	0.012283
SS058	-0.18767	0.12753	-0.0067857	-0.23637	0.031089	0.10896	-0.010055	-0.033174	-0.057685	-0.0007493	0.087574	-0.032118	0.053073	-0.009782	0.01817	0.0061815	0.019883	0.031865	0.0044343	-0.0097018	-0.0049232	0.011846	-0.070611	0.022679	-0.034433	-0.029229	-0.049891	-0.090623	-0.0025821	-0.039935	-0.068405	-0.026515	-0.02552	-0.0035553	-0.00035453	-0.038822	0.0039965	0.0084674	-0.0082757	0.00048647	0.00027998	0.016886	0.0068937	0.017866	0.0010083	-0.0015496	-0.0036013
SS059	-0.25107	0.030843	-0.029601	0.079015	-0.0070952	0.027649	0.044527	-0.053739	-0.085504	-0.0049687	-0.056241	0.0020762	-0.029948	-0.042066	0.037868	0.051425	0.05985	0.022519	-0.047362	-0.054189	-0.031672	-0.033717	0.029717	-0.00017914	-7.4389e-05	-0.033893	-0.058717	-0.02493	-0.011288	0.0099445	-2.6168e-05	0.0024415	-0.010989	0.029013	0.014509	0.0095477	0.019436	0.014043	0.027593	-0.028117	0.015394	0.00084412	-0.032757	-0.00030204	-0.0065704	-0.0093375	0.0065779
SS062	-0.071309	-0.080778	0.060359	0.085196	0.073099	0.098889	-0.033778	0.089543	-0.0012682	0.043731	-0.050481	0.069469	0.023715	-0.032382	-0.081097	0.090878	0.019284	-0.12786	0.040441	0.01798	0.053531	-0.025508	0.0005068	0.011121	0.0084896	-0.030678	-0.025206	-0.022937	-0.024181	0.055103	0.060159	-0.050087	-0.0091934	0.022428	-0.018066	-0.0079799	0.0083713	-0.0021798	-0.0050438	0.0018026	-0.017224	0.0036957	-0.031697	-0.013998	0.0070005	0.011537	-0.001898
SS064	-0.14133	0.047834	-0.050626	0.14423	0.08952	0.10647	-0.049039	-0.03564	0.071088	0.10351	-0.10671	0.039946	-0.01258	-0.020008	0.041877	0.045354	-0.027539	0.023073	0.003492	0.059081	0.00098982	-0.052642	-0.066874	-0.020351	-0.020538	0.0052656	-0.026535	-0.012043	0.0235	-0.029005	0.030229	-0.044912	-0.048907	-0.029649	-0.0061141	-0.011831	0.021406	0.03692	0.015547	-0.0063241	0.0048218	-0.023297	0.0057423	-0.023875	0.0048051	-0.0063476	0.0029867
SS065	-0.20698	0.046625	-0.005135	-0.0061918	-0.072536	-0.061732	-0.10077	-0.048024	0.050448	0.031262	-0.016851	-0.022789	0.029549	0.010029	-0.029235	0.019173	-0.0084447	0.021522	-0.030763	-0.023085	-0.00042558	0.024789	-0.02677	0.098005	0.010816	-0.001365	-0.067181	0.011926	-0.0071889	0.012587	-0.04957	0.027416	-0.031363	-0.016487	-0.014046	0.024213	-0.0036699	0.044666	-0.0043799	0.0062046	0.016361	0.023646	-0.011146	0.0058704	-0.0038734	0.013139	0.0031039
SS067	-0.27671	0.056502	-0.23251	-0.14859	0.032926	-0.12579	0.05052	0.040182	0.015838	-0.042007	-0.023964	0.013035	-0.022839	-0.05589	0.0036636	-0.058209	0.036445	-0.05389	-0.0091968	0.026589	0.018588	-0.041448	-0.03436	0.017647	-0.0038434	0.0081333	-0.070612	-0.0048908	0.06486	0.027383	0.0052528	-0.014846	0.016865	-0.0073484	0.015294	0.016086	0.028518	0.0071212	-0.030627	-0.0089583	-0.0013417	0.0057837	0.0093706	0.010479	-0.012243	-0.0055285	0.00035747
SS068	-0.17158	-0.094666	0.0012511	0.019183	-0.10469	-0.037179	-0.044031	-0.037173	0.03843	0.019678	-0.023327	0.079605	-0.018503	-0.0060676	0.031546	-0.010977	0.033071	0.056393	0.0014043	-0.022351	0.024345	-0.016627	0.010332	0.01199	0.052639	0.0042741	-0.05082	0.021684	-0.068621	-0.028927	-0.067487	-0.068823	0.030151	-0.013959	-0.0062458	-0.017211	-0.049875	-0.050509	0.01921	0.019958	-0.026073	-0.0048422	0.018831	-0.010336	0.024878	-0.016699	-0.0044011
SS070	-0.32389	0.23963	-0.11552	-6.5918e-05	0.10106	-0.0014219	0.077102	-0.1155	-0.043421	-2.6274e-05	0.10042	-0.065892	0.19205	-0.026338	-0.008672	0.040911	-0.024468	-0.029422	0.048477	-0.10429	0.037387	-0.033434	-0.0015656	0.024309	0.029019	-0.044904	0.045748	0.029342	0.008075	0.0068417	0.023191	0.0053513	0.0060718	0.021902	-0.0039914	0.0086517	-0.023074	-0.0048673	0.010286	-0.013323	-0.014455	-0.011963	-0.0070674	0.012874	-0.0077265	0.0082567	-0.0075841
SS071	-0.29528	0.13572	-0.13939	-0.0043648	0.0020456	-0.037316	-0.040596	-0.069977	0.0021062	-0.032619	0.074521	-0.062445	0.044287	0.053908	-0.075983	0.065768	-0.055543	-0.098922	0.094592	0.018804	0.049805	0.010204	-0.014623	0.022471	-0.038125	0.017293	-0.015336	0.046088	-0.053913	-0.02722	0.037763	0.0054486	-0.039626	-0.0053063	0.0082457	0.0033158	-0.010531	0.0023472	0.015152	-0.016316	0.018809	0.0089535	0.0027646	-0.016746	0.018582	-0.021199	-0.0016614
SS074	0.087477	-0.18564	-0.03745	0.049222	0.011522	-0.043	-0.12803	-0.027161	0.090475	0.12753	-0.051583	-0.01796	0.061754	-0.014116	0.040505	0.037676	-0.069693	-0.041326	0.032869	0.0023378	0.075557	-0.027664	-0.066636	-0.0044976	0.0064807	0.03902	0.017144	0.052373	-0.016785	-0.0081133	-0.0043303	-0.0085701	-0.016536	0.035976	-0.023562	-0.017279	-0.017736	0.019371	-0.043266	0.00012052	0.023512	0.030191	-0.0075157	-0.0052011	-0.0028856	-0.0014658	-0.0067292
SS079	0.093011	-0.19658	-0.016548	0.12725	-0.063594	0.040788	-0.10767	-0.033664	0.0017324	0.11259	0.010957	0.011909	-0.016411	0.0086893	0.017917	0.024757	-0.021245	-0.039209	-0.03305	-0.046989	-0.036334	0.026036	0.022057	0.036939	-0.00019574	-0.017025	-0.017481	-0.032243	0.034705	-0.003664	-0.054468	0.030046	-0.014653	-0.0061145	0.016731	0.025126	0.017974	0.0060987	0.0077262	-0.028358	-0.0081252	-0.019285	-0.018172	-0.021163	0.0021471	-0.0012096	-0.0188
SS080	0.1302	0.056853	-0.087029	-0.31278	0.0026512	0.10962	0.096281	-0.097984	0.0025356	0.22223	0.042483	-0.072476	-0.18626	0.084957	0.08603	0.016915	0.078271	0.039392	0.13011	0.03384	0.016889	0.15295	0.0039829	0.045847	-0.0040251	0.07487	0.010904	0.022683	0.033955	0.047659	0.015799	-0.0093562	-0.021147	-0.021983	-0.0093289	-0.022837	-0.004035	-0.013164	0.00061023	-0.0058599	-0.011822	-0.00072035	-0.013369	0.002947	-0.0059651	0.0012333	-0.010607

## Sheet: LEfSe (MWvsHC)
Linear Discriminant Analysis Effect Size (LEfSe) for MW and HC generated from MicrobiomeAnalyst2
	Pvalues	FDR	HC	MW	LDAscore
s__Bifidobacterium_bifidum	3.4655e-12	2.7377e-10	616.97	17.645	2.48
f(U)_Clostridiaceae	7.0349e-12	2.7788e-10	236.97	3976.5	-3.27
g(U)_Lactococcus	2.4875e-11	6.5505e-10	153.14	2.1935	1.88
g(U)_Lachnospira	2.1828e-10	4.3111e-09	5.2542	101.26	-1.69
g(U)_Bifidobacterium	4.029e-08	6.0402e-07	1065.9	208.9	2.63
s__Catenibacterium_mitsuokai	4.5875e-08	6.0402e-07	157.68	570.97	-2.32
s__Bifidobacterium_kashiwanohense	1.7241e-07	1.9458e-06	2210.6	327.42	2.97
s__Holdemanella_biformis	5.0648e-07	5.0015e-06	534.59	1458.4	-2.67
s__Comamonas_terrigena	1.1012e-06	9.6663e-06	0.84746	112.94	-1.76
g(U)_Dialister	1.973e-06	1.5587e-05	18.169	117.29	-1.7
s__Fimenecus_sp000432435	3.9778e-06	2.8568e-05	15.881	220.94	-2.02
s__Streptococcus_thermophilus	1.9038e-05	0.00012533	444.53	0	2.35
s__Ruminococcus_C_callidus	4.2453e-05	0.00024963	16.661	121.39	-1.73
g(U)_Prevotella	4.4699e-05	0.00024963	26.136	250.39	-2.05
g(U)_Klebsiella	4.7398e-05	0.00024963	97.237	11.065	1.64
g(U)_Weissella	5.8164e-05	0.00028718	165	31.677	1.83
s__Bifidobacterium_adolescentis	6.4679e-05	0.00029973	7897	2473.9	3.43
s__Ligilactobacillus_ruminis	7.0683e-05	0.00029973	1545.4	3463.2	-2.98
s__CAG_217_sp000436335	7.2086e-05	0.00029973	155	70.452	1.64
s__Ligilactobacillus_salivarius	9.1288e-05	0.00036059	57.525	50.484	0.655
s__Bacteroides_caccae	0.00019848	0.00072166	13.831	82.065	-1.55
g(U)_Enterococcus_B	0.00020097	0.00072166	22.763	90.677	-1.54
s__Ruminococcus_D_bicirculans	0.00026183	0.00089934	3	12.258	-0.75
f(U)_Enterobacteriaceae	0.00062811	0.0020505	76.356	15.161	1.5
s__RUG472_sp902768995	0.0006489	0.0020505	3.7966	31.645	-1.17
s__Fusicatenibacter_saccharivorans	0.0010469	0.0030717	1361.9	703.81	2.52
s__Parabacteroides_merdae	0.0010498	0.0030717	5.5424	23.677	-1
s__Streptococcus_mutans	0.0014998	0.00409	22.542	14.194	0.714
f(U)_Enterococcaceae	0.0015014	0.00409	273.17	12.774	2.12
f(U)_Ruminococcaceae	0.0022451	0.0059121	15.898	41.032	-1.13
s__Bacteroides_uniformis	0.0024783	0.0063155	13.864	46.29	-1.24
f(U)_Peptostreptococcaceae	0.0027615	0.0068175	1966.4	3432	-2.87
g(U)_Streptococcus	0.0028789	0.0068919	2583	1952.8	2.5
o(U)_Christensenellales	0.0030066	0.006986	50.153	104	-1.45
s__ER4_sp000765235	0.0064257	0.014504	14.797	50.129	-1.27
f(U)_Oscillospiraceae	0.0077506	0.017008	154.41	308.61	-1.89
g(U)_Dorea_A	0.0090276	0.019275	1765	1212	2.44
f(U)_Lachnospiraceae	0.011258	0.023405	7831.1	5716.6	3.02
g(U)_Megasphaera	0.013326	0.026993	28.712	11.194	0.989
s__Agathobaculum_butyriciproducens	0.016585	0.032755	116.36	61.065	1.46
s__Ruthenibacterium_lactatiformans	0.017925	0.034537	18.373	42.452	-1.12
s__Erysipelatoclostridium_ramosum	0.02233	0.042002	22.288	3.2581	1.02
s__CAG_41_sp900066215	0.030359	0.055775	146.49	93	1.44
g(U)_Coprococcus	0.037985	0.068201	50.22	117.45	-1.54
g(U)_Escherichia	0.071173	0.12417	1030.9	5385.6	-3.34
s__Barnesiella_intestinihominis	0.073163	0.12417	4.1525	18.548	-0.914
s__Gemmiger_qucibialis	0.073874	0.12417	717.83	774.29	-1.47
s__Phocaeicola_dorei	0.079053	0.13011	7.4237	51.226	-1.36
s__Bacteroides_fragilis	0.090796	0.14639	9.9153	188.97	-1.96
s__Senegalimassilia_anaerobia	0.12	0.18959	12.085	27.903	-0.95
s__Catenibacterium_sp000437715	0.13281	0.20247	1527.1	1374.2	1.89
g(U)_Collinsella	0.13394	0.20247	657.61	517.03	1.85
s__Phocaeicola_vulgatus	0.13583	0.20247	11.068	73.968	-1.51
s__KLE1615_sp900066985	0.21504	0.31261	39.644	74.387	-1.26
f(U)_Rikenellaceae	0.21934	0.31261	27.322	14.903	0.858
g(U)_Eubacterium_R	0.2216	0.31261	25.305	46.323	-1.06
s__CAG_177_sp003538135	0.23253	0.32228	17.39	24.677	-0.667
g(U)_Eubacterium	0.23765	0.3237	9.0169	26.387	-0.986
g(U)_Anaerobutyricum	0.25167	0.3352	1769.7	1453.1	2.2
g(U)_Faecalibacterium	0.25519	0.3352	725.61	1006.6	-2.15
s__Absicoccus_sp000434355	0.25883	0.3352	205.66	105.84	1.71
s__Ruminococcus_E_bromii_B	0.28002	0.3568	377.24	459.68	-1.63
g(U)_Holdemanella	0.30021	0.37645	1089.7	921.65	1.93
s__Dialister_hominis	0.33205	0.40988	122.97	139.55	-0.968
s__Phil1_sp002069725	0.43575	0.5296	17.695	22.742	-0.547
s__UBA1417_sp003531055	0.53514	0.64055	136.27	87.29	1.41
g(U)_Blautia_A	0.67426	0.77907	6386.9	6281	1.73
s__Faecalitalea_cylindroides	0.67755	0.77907	12.017	7.0323	0.543
s__Faecalibacterium_prausnitzii_D	0.68046	0.77907	390.51	445.9	-1.46
s__Faecalibacillus_intestinalis	0.69596	0.78544	190.53	209.35	-1.02
s__Dorea_formicigenerans	0.72773	0.80973	391.12	403.39	-0.853
g(U)_Clostridium_AQ	0.84461	0.92405	12.949	38.032	-1.13
s__Lactococcus_cremoris	0.85387	0.92405	27.915	70.645	-1.35
s__Limosilactobacillus_mucosae	0.91457	0.97468	138.42	130.65	0.689
g(U)_Akkermansia	0.92533	0.97468	76.051	128.61	-1.44
s__Clostridium_A_leptum	0.93874	0.97579	46.966	17.613	1.2
s__Turicibacter_sp001543345	0.96588	0.98445	50.847	35.194	0.946
s__Enterococcus_faecalis	0.97612	0.98445	83.966	7.3548	1.59
s__Eubacterium_G_sp000434315	0.98445	0.98445	20.508	16.097	0.506

## Sheet: Metadata (ChronicEarly)
Metadata of Chronic and Early for MicrobiomeAnalyst2
#NAME	ADDICTION2	FREQUENCY
RAS1	CHRONIC	2
RAS2	CHRONIC	3
RAS3	EARLY	4
RAS4	CHRONIC	4
RAS5	CHRONIC	4
RAS6	EARLY	4
RAS7	EARLY	3
RAS8	EARLY	2
RAS9	EARLY	3
RAS10	EARLY	3
RAS11	EARLY	3
RAS12	CHRONIC	2
RAS14	CHRONIC	4
RAS15	EARLY	4
RAS16	EARLY	2
RAS17	CHRONIC	4
RAS18	CHRONIC	4
RAS19	EARLY	4
RAS20	EARLY	3
RAS21	CHRONIC	4
RAS23	CHRONIC	3
RAS25	EARLY	4
RAS26	CHRONIC	3
RAS27	CHRONIC	4
RAS28	CHRONIC	4
RAS29	CHRONIC	2
RAS30	CHRONIC	3
RAS31	EARLY	3
RAS32	EARLY	3
RAS33	EARLY	2
RAS35	EARLY	2
RAS36	EARLY	2

## Sheet: OTU (ChronicEarly)
OTU/ASV table of Chronic and Early for MicrobiomeAnalyst2
#NAME	RAS1	RAS10	RAS11	RAS12	RAS14	RAS15	RAS16	RAS17	RAS18	RAS19	RAS2	RAS20	RAS21	RAS23	RAS25	RAS26	RAS27	RAS28	RAS29	RAS3	RAS30	RAS31	RAS32	RAS33	RAS35	RAS36	RAS4	RAS5	RAS6	RAS7	RAS8	RAS9
ASV000001	10215	30414	13954	11313	24819	12569	11571	17061	10898	18329	658	20547	26850	25634	27344	12271	31094	6084	4766	28180	6489	39719	18802	8802	3823	6032	16524	3522	5781	12142	21313	10746
ASV000002	56805	1806	364	744	517	85769	930	1440	21991	634	55117	4469	186	559	6877	555	215	37798	357	2344	258	316	1622	990	7999	35	14067	916	78710	34989	7254	790
ASV000003	3900	5443	414	883	14480	4079	4726	28161	1384	640	4628	37779	2707	8298	15809	6011	489	23435	1357	33772	1732	6944	12038	29671	1532	3345	2921	52807	7560	1872	3291	2982
ASV000004	759	20615	39727	12949	35002	893	369	10297	17301	20581	3424	9992	7901	715	8072	4142	167	751	1921	183	375	2080	40272	181	10737	6849	13191	396	86	1351	6680	4576
ASV000005	13749	2736	5950	392	1624	10240	5030	10207	4103	5305	15312	12227	15534	7942	21642	5940	3336	4618	669	5598	30774	16203	1947	9392	7003	2249	6885	21949	9835	4184	9560	1252
ASV000006	754	267	284	299	240	391	9769	2150	9710	14881	253	1255	9008	457	6676	22749	309	1788	4361	6262	10701	4648	28404	795	10549	5584	3261	302	14552	3320	13775	8412
ASV000007	3407	5454	3431	1026	12919	5437	6781	4819	7573	19897	7958	5786	9143	9281	6886	1555	4238	2101	975	10778	1608	5282	4009	3930	2928	13114	855	2073	1891	11138	5111	2101
ASV000008	0	51	11239	81	740	79	3505	468	804	593	2716	531	240	80961	299	171	25662	58	97	294	465	1804	4239	133	74	43	121	220	1634	0	129	45
ASV000009	1906	2103	65	216	619	1948	12849	3087	5545	9383	65	3773	12505	17184	581	6611	5268	386	3330	56	1426	108	122	2500	6039	585	64	642	51	12371	84	7364
ASV000010	789	5970	14938	3472	2088	2047	2522	3179	2053	5214	128	3586	6262	1538	3408	4808	4215	812	467	3041	2024	7125	3973	5721	2235	2656	5853	1934	2003	6683	6572	1127
ASV000011	980	2997	152	98	1167	592	5564	4276	10083	79	0	3411	125	131	8054	1610	120	844	58	59	19949	4652	77	8865	194	24341	24	71	65	75	8984	108
ASV000012	1987	8530	1842	303	3544	2800	1761	2284	2798	8510	7938	3030	3926	2208	5048	6107	2384	1390	1119	2155	2386	5006	3403	4580	1462	1574	98	653	300	3211	3685	2237
ASV000013	2818	5620	5813	270	1321	2075	71	7369	221	76	43	9110	3461	84	141	324	4273	5249	62	104	7037	9684	101	57	83	3197	87	7249	37	0	59	80
ASV000014	824	375	8466	11591	2508	1535	5732	1381	3429	284	414	553	170	419	199	98	1467	2055	2793	226	3121	351	2114	1727	2891	842	2806	2549	3313	1460	1005	8266
ASV000015	43	1733	348	2397	15665	140	2099	5817	1662	5726	64	8705	762	3277	408	94	640	80	1665	794	337	1136	550	386	1687	472	530	166	1297	1951	1076	5865
ASV000016	892	2406	3858	3908	2956	795	4713	1550	1695	236	2274	1631	3359	2375	902	362	7179	429	795	1003	1872	811	1728	2628	716	952	282	2753	1060	5078	2213	2212
ASV000017	584	2740	5765	1848	2138	624	1668	1306	5635	621	6249	879	3125	1296	859	653	4837	415	322	1867	3735	3594	2643	2372	772	1822	56	1288	1454	1544	775	787
ASV000018	728	3290	676	5155	8715	632	3604	2850	504	218	0	3056	13164	1472	2742	2465	667	466	122	1141	388	3973	599	1566	994	633	108	280	279	959	1388	238
ASV000019	924	2078	4032	668	947	686	10143	1359	2473	75	2786	986	4196	1324	121	238	543	557	386	619	823	1871	5105	5719	611	1160	1873	560	328	2769	1414	792
ASV000020	22	1810	81	96	46	36	5715	0	28	42	40	33	31	0	0	60	33	91	4908	42	11462	85	50	52	106	10032	43	1760	0	51	21	8557
ASV000021	2006	9	17	18	6	46	155	2651	617	488	35	231	2409	517	6061	7016	4035	1485	233	888	120	388	314	42	646	5865	57	21	338	1097	900	229
ASV000022	80	432	10269	394	345	215	5445	114	1274	47	581	80	85	100	41	46	230	93	785	847	824	114	1956	462	462	144	7779	534	260	132	182	2619
ASV000023	557	39	78	30665	33	1277	33	0	199	0	0	22	92	0	699	8	0	0	0	0	0	82	0	331	299	0	90	0	0	0	41	50
ASV000024	1425	449	36	103	0	5790	44	56	218	0	8029	311	0	0	0	0	0	4889	38	250	0	60	245	63	161	0	4367	62	3196	1776	344	0
ASV000025	121	340	1267	940	381	139	462	1630	336	180	110	2230	1001	424	793	331	2664	273	203	5642	105	345	354	1974	520	2512	350	137	521	926	2155	533
ASV000026	0	10843	7903	2710	1775	0	0	0	0	0	708	0	0	0	1532	0	0	0	0	32	0	0	0	0	0	0	2480	0	0	0	0	0
ASV000027	0	58	193	92	1479	71	7620	117	17	5561	15	178	274	788	120	59	483	55	22	151	4147	226	701	87	439	2558	109	36	323	67	769	25
ASV000028	33	36	37	33	39	55	329	40	41	3902	24	36	56	24	69	62	293	0	0	320	1265	162	0	29	415	10022	60	0	3038	331	4757	40
ASV000029	272	1690	0	568	766	329	0	288	2077	120	0	416	1455	186	1486	1265	944	338	0	1513	0	581	1207	585	0	0	1205	539	2672	1310	1116	0
ASV000030	0	0	0	0	36	0	0	23	8166	287	0	46	51	64	5296	89	0	50	32	0	0	30	0	235	5448	0	0	0	0	0	0	0
ASV000031	3346	908	556	416	922	1761	502	435	759	74	187	558	215	355	361	153	645	346	222	197	447	400	113	1383	275	413	289	551	398	249	1259	516
ASV000032	13	32	693	111	246	8	87	678	50	51	3982	626	4513	668	266	249	2350	74	25	991	29	73	0	17	231	35	48	37	376	1859	40	14
ASV000033	77	1254	2901	437	220	123	314	153	20	0	0	207	434	762	382	138	198	224	49	80	385	3641	2079	421	27	882	17	157	197	553	1278	79
ASV000034	48	23	27	12	45	27	169	202	877	4546	343	102	64	265	67	1578	23	99	26	109	993	570	1937	565	94	806	380	28	370	34	2495	13
ASV000035	39	0	1007	0	0	38	161	0	0	1758	50	0	0	0	0	0	0	729	17	6496	95	47	0	4640	1654	0	77	0	75	28	0	0
ASV000036	195	153	1224	0	75	220	101	209	523	78	3341	184	33	0	689	0	3853	0	0	70	79	3178	1018	60	57	33	0	0	1306	115	45	0
ASV000037	0	0	0	26	6	0	0	114	0	0	15	17	20	0	0	0	0	414	0	18	0	22	0	164	0	227	14157	11	21	13	0	12
ASV000038	7	16	30	6727	252	44	24	12	0	0	8	16	23	18	8	0	17	51	48	47	45	52	542	4667	49	60	401	851	0	117	45	50
ASV000039	64	85	26	386	93	33	923	67	0	0	99	0	0	0	20	13	70	46	218	25	252	0	0	0	45	130	30	101	29	4490	0	4596
ASV000040	0	0	0	0	0	0	0	0	0	0	0	0	0	0	0	0	0	0	0	0	0	0	11842	0	0	0	0	0	0	0	0	0
ASV000041	0	0	0	0	445	0	0	0	0	10897	34	0	0	0	0	0	0	0	0	0	0	0	0	0	0	0	0	0	0	0	0	0
ASV000042	0	0	0	0	0	0	0	0	452	0	0	0	0	0	353	0	0	0	0	0	0	0	10279	0	0	0	0	0	0	0	0	0
ASV000043	0	32	0	3921	40	26	0	48	0	0	0	36	32	345	0	0	27	0	104	0	0	20	431	0	0	73	0	0	0	965	4391	327
ASV000044	0	0	382	0	0	0	2809	0	0	0	0	0	0	0	0	0	0	0	922	0	363	0	0	0	854	504	0	0	0	0	0	4971
ASV000045	0	0	0	36	0	0	179	0	0	0	15	0	29	0	0	0	5	14	0	29	509	55	681	0	27	0	9060	28	25	21	0	0
ASV000046	0	18	2003	19	12	0	0	50	41	0	0	88	4434	16	671	0	1487	0	0	0	0	0	19	0	0	0	17	1321	0	0	19	0
ASV000047	0	20	39	729	31	0	0	0	0	3	4970	5	4	12	0	4	0	0	0	32	19	3	17	0	0	0	18	38	10	89	4160	5
ASV000048	31	0	0	12	0	0	8	0	8	0	0	0	19	0	0	7	0	28	0	11	0	35	10	7	2995	0	6314	0	10	23	0	0
ASV000049	15	5	16	9	18	0	1553	331	0	0	0	40	0	24	29	81	11	936	0	19	1895	16	15	9	17	770	0	3258	279	17	0	3
ASV000050	0	97	419	1131	601	0	22	105	655	11	0	128	17	11	156	0	529	1296	635	0	37	35	697	58	24	32	0	14	0	507	42	1726
ASV000051	391	3837	25	24	9	299	0	192	0	5	7	224	11	0	0	0	0	66	9	8	3290	25	3	11	0	0	9	0	0	0	9	5
ASV000052	0	0	0	0	0	0	314	38	0	0	0	75	0	0	350	4481	0	0	0	2962	0	0	0	0	0	0	0	0	0	0	0	0
ASV000053	100	131	0	0	0	100	76	0	356	13	22	0	15	0	26	21	31	1014	93	38	94	105	25	1361	149	0	0	3022	692	161	192	290
ASV000054	63	27	885	16	437	94	855	32	48	19	456	33	461	562	10	0	554	0	49	511	49	119	70	1706	44	336	78	104	20	173	21	110
ASV000055	41	936	74	0	1375	62	0	112	40	47	153	200	118	40	231	0	1832	37	0	466	0	28	1856	26	0	0	0	130	0	102	0	0
ASV000056	31	0	4	1066	0	0	7	0	24	3	3	0	2	0	0	0	10	6024	11	0	23	22	18	10	16	0	0	0	3	224	339	20
ASV000057	768	0	0	75	87	438	0	788	172	0	0	881	245	0	694	202	81	120	0	0	0	1994	0	0	101	0	0	526	236	225	0	0
ASV000058	142	335	0	4049	131	67	62	0	751	0	0	0	137	0	33	0	0	0	0	0	0	44	0	676	0	54	638	314	0	173	0	0
ASV000059	245	172	181	395	34	327	211	0	196	12	15	19	48	20	179	92	49	2096	535	95	109	58	23	83	291	136	341	44	59	0	31	1449
ASV000060	3382	67	0	0	0	2406	0	0	0	0	85	0	0	0	0	442	0	0	0	0	0	0	0	0	632	0	224	26	0	0	0	32
ASV000061	19	0	0	0	0	0	0	0	0	0	0	0	0	0	0	0	0	79	0	0	0	0	0	0	0	45	7125	0	0	0	0	0
ASV000062	212	397	162	0	408	288	214	106	250	0	16	117	370	26	333	53	24	282	70	207	122	453	0	1241	42	91	0	1049	96	0	262	147
ASV000063	40	564	17	0	119	27	295	0	0	0	0	0	0	17	43	171	0	407	128	0	219	0	29	1219	0	99	0	2032	383	0	690	374
ASV000064	0	0	0	0	0	175	0	1976	0	0	0	2722	0	0	1852	0	0	0	0	0	0	0	0	0	0	0	0	0	0	0	0	0
ASV000065	127	8	34	0	20	116	213	257	181	23	276	151	242	68	122	343	262	237	73	13	190	190	0	943	184	84	0	1753	241	83	51	191
ASV000066	0	0	0	0	0	0	0	0	114	0	0	0	0	0	0	0	3903	0	134	0	203	127	178	0	193	211	0	573	141	94	452	225
ASV000067	70	0	35	72	20	176	42	7	1296	7	0	0	0	18	158	8	0	39	40	0	0	0	373	132	637	0	0	20	2086	0	927	272
ASV000069	0	21	10	0	72	0	0	31	0	8	0	12	0	0	0	0	0	0	636	0	158	0	13	0	0	0	0	127	0	0	0	5005
ASV000070	0	0	0	1181	12	0	0	0	0	0	0	0	0	13	0	0	0	0	0	0	0	0	24	0	0	0	0	4852	0	4	0	0
ASV000071	2548	0	12	8	161	2378	151	36	8	346	9	133	6	25	11	15	54	69	0	19	0	18	0	3	3	0	5	10	23	7	19	0
ASV000072	177	0	35	0	12	363	0	0	21	29	62	0	0	0	78	0	39	99	29	34	0	0	0	82	131	0	4599	79	41	0	0	115
ASV000073	2062	1353	0	6	0	1604	0	0	0	0	10	0	0	0	4	0	516	10	14	0	0	0	0	8	0	0	14	165	12	9	8	10
ASV000074	0	45	47	216	245	0	1376	87	173	0	0	47	36	0	0	0	0	0	72	0	143	49	0	27	0	128	1428	75	0	0	35	1532
ASV000075	39	312	92	1090	0	69	0	29	274	12	0	29	40	47	0	42	0	187	136	33	499	20	52	1280	191	23	0	512	77	65	39	223
ASV000076	250	1366	0	348	99	445	247	40	413	5	0	70	204	26	53	146	112	345	159	0	165	0	0	290	218	0	7	6	0	0	18	355
ASV000077	35	59	108	36	256	82	425	428	149	175	0	379	265	67	30	52	545	28	118	123	70	0	215	86	259	291	0	45	55	302	35	305
ASV000078	20	0	0	0	0	0	0	89	0	0	0	136	0	165	0	0	0	0	340	0	0	0	0	0	0	24	0	0	0	2876	0	1019
ASV000079	0	0	0	0	0	0	0	0	0	0	0	0	0	0	0	0	0	0	0	0	0	0	0	0	0	0	0	0	4530	0	0	0
ASV000080	172	7	1493	36	42	191	205	11	68	1060	0	15	46	4	68	76	14	196	0	0	71	66	94	45	74	12	227	0	40	98	75	0
ASV000081	0	1611	0	181	482	0	0	237	0	237	0	353	0	0	713	0	0	0	0	0	0	0	0	0	0	0	0	0	0	656	0	0
ASV000082	417	231	0	873	0	1250	8	0	0	0	0	0	0	0	0	0	92	7	0	0	0	0	0	684	707	0	0	10	7	0	14	19
ASV000083	0	0	0	0	0	0	0	163	202	1136	0	0	954	0	0	0	0	0	0	507	0	0	0	0	0	137	318	0	619	0	0	0
ASV000084	320	29	67	56	26	396	65	0	416	0	0	0	0	8	16	103	9	105	37	0	31	15	0	1423	80	25	0	504	98	7	35	151
ASV000085	156	0	274	141	0	626	0	371	396	0	490	153	159	100	0	0	260	0	0	79	0	0	0	0	384	0	0	0	30	383	0	0
ASV000086	1014	0	8	371	0	1046	33	0	1048	0	44	12	12	0	0	0	14	0	0	0	0	0	0	0	163	0	0	0	128	0	28	31
ASV000087	112	0	0	95	0	95	0	1135	0	0	0	1200	0	0	311	0	0	56	0	0	0	848	0	0	0	0	0	0	0	0	91	0
ASV000088	209	74	5	0	7	7	0	7	0	56	0	0	0	0	0	149	0	0	0	0	0	0	0	0	193	0	0	0	0	0	3099	0
ASV000089	41	20	13	0	17	25	20	35	48	205	14	21	27	7	91	93	17	30	0	34	0	38	10	17	8	26	405	27	1831	29	568	14
ASV000090	0	0	0	0	0	0	0	388	0	2262	0	381	0	0	0	0	0	0	0	0	0	0	0	0	338	0	0	0	0	0	374	0
ASV000091	0	335	0	366	0	0	0	0	0	0	0	0	0	1033	391	514	0	0	0	228	163	0	0	0	0	0	414	155	0	0	0	0
ASV000092	669	0	18	775	15	1027	8	0	0	0	0	0	0	0	43	0	0	660	0	0	0	0	7	165	0	0	0	0	0	0	0	41
ASV000093	86	15	28	487	10	192	31	43	66	15	319	35	0	0	0	0	192	0	30	64	20	10	42	73	156	19	1191	0	35	0	18	241
ASV000094	0	19	701	933	0	0	33	0	0	0	0	0	0	0	53	225	141	0	0	7	0	224	49	0	0	211	0	0	37	0	702	0
ASV000095	0	0	0	0	0	0	0	0	0	0	27	0	0	0	0	0	0	0	0	24	0	0	0	0	0	0	3207	25	0	0	0	0
ASV000096	0	0	0	0	0	0	0	0	0	0	0	0	0	0	0	0	0	0	0	0	0	0	0	0	0	0	0	3296	0	0	0	0
ASV000097	121	0	28	0	0	393	0	0	173	0	0	22	0	0	14	0	0	1468	34	0	0	0	0	521	31	0	0	95	56	0	0	135
ASV000098	312	43	6	35	21	387	699	8	67	10	7	7	2	0	88	78	0	64	0	298	0	93	4	8	0	5	0	158	457	5	200	0
ASV000099	1310	17	0	68	0	764	0	8	13	0	32	4	9	0	62	0	0	0	0	16	0	15	22	7	0	0	302	0	154	13	186	8
ASV000100	33	119	22	19	62	35	334	49	28	972	51	62	129	204	148	0	50	30	0	8	212	37	42	18	61	5	126	0	35	35	51	12
ASV000101	0	0	0	186	0	0	0	0	37	0	0	0	0	0	0	0	0	0	0	0	0	0	32	0	45	0	163	0	2286	17	88	53
ASV000102	0	781	0	273	16	0	0	0	28	0	0	0	201	14	23	198	0	0	5	0	324	7	133	186	297	45	365	0	0	0	0	0
ASV000103	0	0	0	0	0	0	10	0	1449	56	0	0	0	0	0	0	0	792	0	0	15	116	178	196	11	0	0	0	0	0	0	0
ASV000104	15	100	128	8	750	57	209	30	25	190	34	32	16	8	40	0	768	3	0	0	0	71	69	33	14	60	10	0	83	0	3	0
ASV000105	0	0	22	1615	0	9	13	0	0	0	0	0	0	0	0	0	0	253	0	0	0	12	0	793	0	0	5	0	0	0	0	13
ASV000106	74	209	45	217	15	111	22	8	172	0	0	13	0	0	26	33	0	265	35	44	40	0	39	455	97	26	110	302	82	0	22	104
ASV000107	219	82	0	0	14	605	0	0	19	0	0	0	0	0	9	27	0	482	26	36	0	115	0	246	102	0	0	176	0	46	263	78
ASV000108	78	96	83	100	135	95	26	140	158	0	0	73	0	0	0	13	0	163	57	65	299	30	47	31	74	59	141	66	81	44	0	286
ASV000109	0	0	0	0	90	0	0	0	0	0	0	0	0	0	0	905	0	0	0	1183	0	0	232	0	0	0	0	0	0	0	0	0
ASV000110	146	6	0	0	0	121	0	0	28	204	1407	0	0	0	0	0	2	60	11	14	0	0	0	62	0	0	0	5	267	0	37	2
ASV000111	64	138	47	365	0	82	0	0	158	0	15	0	0	0	44	0	90	103	94	17	0	0	0	72	60	0	225	70	106	0	92	539
ASV000112	0	0	18	0	0	0	0	0	0	0	0	11	3	0	0	0	0	24	0	10	2158	0	0	11	0	0	0	34	0	0	0	0
ASV000113	0	0	0	0	0	0	0	0	0	269	0	0	1405	0	0	0	0	0	0	0	0	0	0	0	0	0	0	0	0	447	0	0
ASV000114	180	0	0	0	2	0	0	315	0	0	0	61	368	8	342	602	0	54	0	0	0	41	0	0	0	0	0	0	0	0	132	0
ASV000115	0	0	0	0	0	0	0	0	0	0	0	0	0	0	0	0	0	0	0	0	0	0	0	0	0	0	0	2069	0	0	0	0
ASV000116	0	0	32	69	0	85	51	0	244	0	0	19	0	0	0	22	0	610	42	0	0	0	27	316	0	0	0	301	51	0	70	107
ASV000117	0	0	0	0	0	0	0	0	0	0	0	0	0	0	0	2046	0	0	0	0	0	0	0	0	0	0	0	0	0	0	0	0
ASV000118	64	117	0	336	0	148	0	0	33	0	0	0	0	0	29	42	9	319	0	11	0	18	0	440	48	0	0	301	17	0	64	33
ASV000119	49	0	141	9	17	86	25	75	0	0	0	68	0	0	0	106	0	64	57	0	0	175	46	323	0	77	0	486	0	0	120	63
ASV000120	0	37	0	0	0	0	0	6	804	3	0	7	0	0	0	13	0	0	0	0	14	37	0	596	126	3	96	68	60	0	110	0
ASV000121	200	0	0	0	0	0	0	600	0	0	0	623	0	0	0	0	0	0	0	0	0	308	0	0	0	0	0	0	0	186	0	0
ASV000122	213	0	0	0	0	659	0	0	44	0	9	0	0	0	0	10	0	129	0	11	0	0	0	16	63	0	0	564	139	6	0	0
ASV000123	0	0	0	0	0	0	0	10	0	0	0	0	0	0	0	0	1814	0	0	0	0	0	4	9	0	0	0	0	0	0	0	0
ASV000124	0	31	0	0	0	0	0	0	0	0	0	0	0	0	0	5	0	0	0	258	11	0	0	0	795	30	587	0	0	0	0	0
ASV000125	0	0	0	0	0	0	0	0	0	0	0	0	0	0	1700	0	0	0	0	0	0	0	0	0	0	0	0	0	0	0	0	0
ASV000126	0	0	0	0	0	0	0	0	0	0	0	0	0	0	0	0	0	0	0	1223	0	0	0	305	0	92	0	0	0	0	0	0
ASV000127	33	22	42	387	17	75	0	35	59	15	23	11	13	0	12	5	10	31	54	4	13	0	104	52	46	5	0	0	216	0	30	301
ASV000128	0	0	0	109	0	0	0	0	0	0	7	0	0	0	0	23	0	0	0	0	0	5	0	511	44	0	0	885	10	0	0	0
ASV000129	0	0	0	0	0	0	0	0	0	0	0	0	0	0	0	0	1578	0	0	0	0	0	0	0	0	0	0	0	0	0	0	0
ASV000130	0	29	21	670	49	0	84	0	52	0	0	0	0	0	12	9	0	120	22	0	18	63	0	144	133	0	0	0	0	11	47	50
ASV000131	124	0	0	58	0	216	106	0	0	0	29	0	0	0	0	0	17	0	0	0	0	0	0	40	0	0	778	0	0	0	55	73
ASV000132	20	0	0	0	0	0	0	0	220	0	0	0	0	0	149	525	0	5	11	0	0	0	0	0	0	112	0	0	312	80	20	11
ASV000133	0	1457	0	0	0	0	0	0	0	0	0	0	0	0	0	0	0	0	0	0	0	0	0	0	0	0	0	0	0	0	0	0
ASV000134	24	29	0	237	13	68	0	0	0	0	0	0	0	0	0	0	50	13	13	0	0	0	0	151	50	0	0	0	709	11	17	67
ASV000135	289	0	128	0	0	936	0	0	0	0	0	0	0	0	0	0	0	0	0	0	0	81	0	0	0	0	0	0	0	0	0	0
ASV000136	0	0	0	456	0	0	0	0	0	0	537	0	0	0	0	0	0	0	0	0	0	0	0	327	95	0	0	0	18	0	0	0
ASV000137	0	0	0	0	0	0	0	0	1408	0	0	0	0	0	0	0	0	0	0	0	0	0	0	0	0	0	0	0	0	0	0	0
ASV000138	0	0	0	0	0	0	25	0	0	0	0	0	0	0	0	30	0	0	0	0	0	0	0	184	28	0	1094	0	8	29	0	0
ASV000139	0	0	0	0	3	0	0	0	0	0	0	4	0	1364	0	3	0	0	0	0	0	0	6	0	0	0	0	3	0	0	0	0
ASV000140	882	0	0	0	0	466	0	0	0	0	0	0	0	0	0	0	0	0	0	0	0	0	0	0	0	0	0	0	0	0	0	0
ASV000141	0	0	13	0	0	0	42	0	12	1181	0	0	0	0	0	0	17	0	0	9	0	19	20	0	0	0	14	0	0	0	0	0
ASV000142	665	0	0	0	0	652	0	0	0	0	0	0	0	0	0	0	0	0	0	0	0	0	0	0	0	0	0	0	0	0	0	0
ASV000143	3	0	48	442	24	14	0	0	23	0	131	0	6	0	0	0	16	0	0	0	0	2	4	18	0	0	575	0	2	0	0	7
ASV000144	0	0	0	0	0	0	0	0	0	0	0	0	0	0	325	348	0	0	0	0	0	0	0	0	0	517	0	0	0	122	0	0
ASV000145	0	0	0	0	0	0	0	0	0	8	0	0	0	0	0	0	902	0	0	0	0	0	0	49	0	0	0	0	0	0	342	0
ASV000146	0	11	0	0	53	0	80	0	0	0	0	0	0	0	0	0	0	12	50	0	0	0	0	0	0	14	487	0	0	0	0	602
ASV000147	0	0	0	0	0	0	0	0	127	0	0	22	0	0	381	642	0	74	25	0	0	0	0	0	0	0	0	0	0	0	0	35
ASV000148	9	6	0	27	4	13	0	0	0	0	0	0	0	0	11	33	182	12	0	0	0	0	0	168	7	0	16	658	108	29	18	0
ASV000149	129	31	808	22	26	100	0	0	20	0	0	19	0	0	0	0	21	17	0	0	0	0	0	0	80	0	0	0	0	18	0	0
ASV000150	109	15	15	67	7	0	0	74	207	22	9	0	46	0	6	4	69	130	21	6	6	52	7	6	0	0	56	0	14	0	116	145
ASV000151	0	0	211	0	0	0	0	0	0	0	0	0	0	0	0	0	1072	0	0	0	0	0	0	0	0	0	0	0	0	0	0	0
ASV000152	0	0	0	0	0	0	0	0	0	0	0	7	0	0	7	0	0	0	0	0	1130	10	9	0	0	0	0	98	0	0	0	0
ASV000153	0	105	27	204	24	0	14	0	166	0	0	0	27	0	0	316	15	112	0	0	0	0	0	111	0	10	0	128	0	0	0	0
ASV000154	9	0	53	967	7	31	17	14	0	0	0	7	0	0	0	0	5	0	0	0	0	0	0	16	70	0	0	4	18	0	0	0
ASV000155	0	0	0	0	47	0	0	0	0	0	0	82	0	0	0	31	0	152	0	0	0	0	0	0	761	100	0	0	0	0	0	0
ASV000156	0	0	0	0	6	0	0	0	0	0	0	0	0	0	0	52	0	0	0	0	0	0	0	716	12	0	0	385	0	0	0	0
ASV000157	0	0	0	0	0	0	0	0	0	0	0	0	0	0	0	0	0	0	0	0	0	0	0	1165	0	0	0	0	0	0	0	0
ASV000158	0	0	0	0	0	0	0	0	0	0	0	0	0	0	0	0	0	0	0	0	0	0	1163	0	0	0	0	0	0	0	0	0
ASV000159	0	0	0	0	0	0	0	0	0	0	0	0	0	0	0	0	0	0	0	0	0	0	0	11	0	0	0	0	1144	0	0	0
ASV000161	0	0	0	0	0	0	0	0	73	0	0	0	0	0	0	0	0	116	0	0	0	0	0	918	0	31	0	0	0	0	0	0
ASV000162	173	0	0	0	0	0	0	0	0	0	0	0	227	0	0	0	0	0	0	0	0	547	0	0	0	0	0	180	0	0	0	0
ASV000163	0	0	0	151	0	0	0	0	118	20	18	0	0	0	37	37	0	108	0	0	0	0	18	0	340	0	153	0	74	0	26	0
ASV000164	0	0	0	0	0	0	188	0	0	0	0	0	0	0	0	0	0	0	0	0	415	0	203	0	0	0	266	0	0	0	0	0
ASV000165	0	0	0	63	7	0	0	0	181	0	0	0	0	0	0	0	0	13	74	0	0	0	0	0	0	0	0	0	0	0	9	717
ASV000166	0	0	0	0	0	0	0	0	0	0	0	0	0	0	0	0	0	0	0	0	0	0	0	0	0	0	1055	0	0	0	0	0
ASV000167	31	0	0	56	0	51	63	14	59	0	0	0	0	0	0	0	0	7	0	4	0	0	0	44	0	0	578	6	14	5	125	0
ASV000168	51	8	0	0	0	71	0	0	0	0	0	0	0	0	0	0	0	0	120	0	0	0	0	0	0	0	0	0	0	0	0	803
ASV000169	37	21	150	41	0	69	18	16	70	0	0	20	21	7	0	0	0	0	72	0	0	50	111	24	0	0	0	0	0	0	0	315
ASV000170	0	0	53	0	0	0	0	0	10	0	0	0	9	0	0	0	0	43	0	0	12	0	0	113	44	0	0	0	637	29	0	53
ASV000171	0	0	0	0	0	0	0	2	695	0	0	0	0	0	0	0	0	0	97	0	0	0	0	0	0	0	0	0	0	0	0	209
ASV000172	21	22	0	170	0	22	0	13	0	0	113	0	19	0	0	0	0	0	0	0	0	0	0	13	10	0	578	0	0	0	0	18
ASV000173	10	0	0	0	0	0	0	0	4	0	0	0	0	0	0	0	0	0	0	0	0	0	68	0	0	0	908	0	0	3	0	0
ASV000174	0	0	0	0	0	0	0	0	0	0	0	0	0	0	0	0	0	0	0	0	0	0	0	0	0	0	0	0	0	0	980	0
ASV000176	0	0	6	0	6	0	0	0	481	0	0	0	3	0	0	0	0	14	107	0	6	0	0	0	0	0	0	12	0	0	0	252
ASV000177	0	0	0	0	0	0	0	500	0	0	0	377	0	0	0	0	0	0	0	0	0	0	0	0	0	0	0	0	0	0	0	0
ASV000178	0	0	0	0	0	0	0	0	0	0	0	0	0	0	0	0	0	0	0	0	0	0	0	0	0	0	0	0	0	0	852	0
ASV000179	0	0	0	0	0	0	16	0	0	0	0	0	0	88	0	0	0	0	0	0	0	0	0	0	654	0	0	0	78	0	0	0
ASV000180	0	5	4	749	0	18	0	0	0	0	0	0	0	0	0	0	0	4	0	0	0	0	0	25	0	0	4	18	0	0	0	0
ASV000181	0	98	0	0	0	0	0	0	0	0	0	0	0	0	0	56	0	0	0	0	0	0	0	0	101	0	0	0	0	0	563	0
ASV000182	0	0	0	816	0	0	0	0	0	0	0	0	0	0	0	0	0	0	0	0	0	0	0	0	0	0	0	0	0	0	0	0
ASV000183	0	0	0	0	0	0	0	0	0	0	619	0	0	0	0	0	0	83	0	0	0	0	0	0	0	0	0	0	105	0	0	0
ASV000184	0	0	0	754	0	0	0	0	0	0	0	0	0	0	0	0	9	0	0	0	0	0	0	0	22	0	0	0	0	0	0	0
ASV000185	0	0	0	0	0	0	0	0	0	0	0	0	746	0	0	0	0	0	0	0	0	0	0	0	0	0	0	0	43	0	0	0
ASV000186	0	0	13	0	0	0	11	0	0	0	0	3	0	0	0	422	0	0	0	0	0	0	0	81	0	39	0	197	0	0	0	0
ASV000187	0	765	0	0	0	0	0	0	0	0	0	0	0	0	0	0	0	0	0	0	0	0	0	0	0	0	0	0	0	0	0	0
ASV000188	0	0	0	563	0	0	0	0	0	0	0	0	0	0	0	0	12	0	14	22	0	9	37	0	0	0	59	0	0	0	0	44
ASV000189	0	0	0	0	0	0	0	0	0	0	0	0	0	0	0	0	0	0	0	749	0	0	0	0	0	0	0	0	0	0	0	0
ASV000190	0	0	0	0	0	0	0	0	0	0	0	0	0	0	0	0	0	0	0	0	746	0	0	0	0	0	0	0	0	0	0	0
ASV000191	0	0	0	0	0	0	0	0	0	0	0	0	0	0	0	0	0	0	0	0	744	0	0	0	0	0	0	0	0	0	0	0
ASV000192	0	0	0	0	0	0	0	0	0	6	0	0	0	0	0	0	0	0	135	0	0	0	0	0	0	0	0	0	0	0	0	585
ASV000193	0	0	0	0	0	0	0	0	0	0	0	0	641	0	85	0	0	0	0	0	0	0	0	0	0	0	0	0	0	0	0	0
ASV000194	11	20	0	0	98	0	24	22	0	17	21	0	0	121	0	23	34	0	12	0	0	0	74	0	19	20	0	75	0	30	50	13
ASV000195	18	0	0	0	0	49	0	0	17	0	0	0	0	0	0	0	0	0	12	0	0	7	0	518	92	0	0	0	0	0	0	0
ASV000196	0	0	0	709	0	0	0	0	0	0	0	0	0	0	0	0	0	0	0	0	0	0	0	0	0	0	0	0	0	0	0	0
ASV000197	0	0	0	0	0	0	0	0	0	0	0	0	0	0	0	0	0	0	24	0	0	0	0	0	0	0	0	0	0	0	0	684
ASV000198	0	704	0	0	0	0	0	0	0	0	0	0	0	0	0	0	0	0	0	0	0	0	0	0	0	0	0	0	0	0	0	0
ASV000199	0	0	0	0	0	0	685	0	0	0	0	0	0	0	0	0	0	0	0	0	0	0	0	0	0	0	0	0	0	0	0	0
ASV000201	0	483	0	0	0	0	0	0	0	0	0	0	0	0	0	0	0	0	0	187	0	0	0	0	0	0	0	0	0	0	0	0
ASV000202	19	0	0	0	0	0	0	0	0	9	3	0	54	0	539	27	0	4	0	0	2	0	0	0	0	2	0	0	0	0	0	0
ASV000203	0	113	0	0	0	0	0	0	440	0	0	0	0	0	0	0	0	0	0	0	0	0	0	0	0	0	0	0	92	0	0	0
ASV000204	0	0	0	0	0	0	0	0	0	0	526	6	0	0	0	0	0	0	0	0	0	0	0	0	0	0	0	0	112	0	0	0
ASV000205	0	18	0	0	0	0	0	0	0	0	0	0	0	0	0	0	0	0	0	0	0	0	0	0	28	0	0	0	187	0	408	0
ASV000206	0	0	0	0	39	0	0	0	0	0	0	0	0	0	0	0	0	584	0	0	0	0	0	0	0	0	0	0	0	0	0	0
ASV000207	0	0	0	0	0	0	0	0	0	0	0	0	0	0	0	0	0	0	0	0	0	619	0	0	0	0	0	0	0	0	0	0
ASV000208	0	0	0	0	62	0	361	0	38	0	0	0	0	37	0	0	0	0	0	0	116	0	0	0	0	0	0	0	0	0	0	0
ASV000209	0	0	0	0	0	121	0	0	0	0	488	0	0	0	0	0	0	0	0	0	0	0	0	0	0	0	0	0	0	0	0	0
ASV000210	0	0	0	0	0	0	0	0	0	0	0	0	423	0	0	0	0	0	0	0	0	0	0	186	0	0	0	0	0	0	0	0
ASV000211	0	0	0	0	0	0	0	0	0	0	0	0	0	0	0	0	0	0	0	0	0	0	0	0	0	0	0	599	0	0	0	0
ASV000212	0	0	0	0	0	0	0	0	0	0	0	0	0	0	0	0	0	0	0	0	0	0	0	0	0	0	0	598	0	0	0	0
ASV000213	0	0	0	0	0	0	0	0	0	0	0	0	0	0	596	0	0	0	0	0	0	0	0	0	0	0	0	0	0	0	0	0
ASV000214	33	0	0	401	0	34	0	0	18	0	0	0	0	0	0	0	0	0	0	0	0	0	0	0	33	0	74	0	0	0	0	0
ASV000215	0	0	0	0	0	0	0	0	0	0	0	0	0	0	0	0	0	0	0	0	3	0	0	590	0	0	0	0	0	0	0	0
ASV000216	0	0	0	0	0	0	0	0	0	0	0	0	0	0	0	0	0	0	0	0	587	0	0	0	0	0	0	0	0	0	0	0
ASV000218	0	0	0	0	0	0	574	0	0	0	0	0	0	0	0	0	0	0	0	0	0	0	0	0	0	0	0	0	0	0	0	0
ASV000219	0	0	0	0	0	0	0	0	0	0	0	0	0	0	444	0	0	0	0	0	122	0	0	0	0	0	0	0	0	0	0	0
ASV000220	0	0	0	0	0	0	440	0	0	0	0	0	0	0	0	0	0	0	0	0	110	0	0	0	0	0	0	0	0	0	0	0
ASV000221	0	0	0	524	0	0	0	0	0	0	0	0	0	0	0	0	0	0	0	0	0	0	0	0	0	0	0	0	0	0	23	0
ASV000222	0	0	0	0	0	0	0	106	0	0	0	36	0	0	0	0	0	0	0	0	0	0	0	0	0	0	405	0	0	0	0	0
ASV000223	0	0	540	0	0	0	0	0	0	0	0	0	0	0	0	0	0	0	0	0	0	0	0	0	0	0	0	0	0	0	0	0
ASV000224	0	0	0	0	0	0	0	0	0	0	0	0	0	0	0	0	0	0	0	0	0	0	0	0	0	528	0	0	0	0	0	0
ASV000225	0	0	0	0	0	0	0	0	0	0	0	0	0	0	0	0	0	0	0	0	0	0	511	0	0	0	0	0	0	0	0	0
ASV000226	0	0	18	30	0	45	0	0	21	18	0	26	26	0	45	0	0	28	0	16	20	33	0	58	0	0	38	0	36	0	0	20
ASV000227	0	0	0	420	0	0	9	0	0	0	16	0	0	0	0	0	0	0	0	0	0	0	6	0	0	0	19	0	0	0	0	16
ASV000228	107	0	0	0	0	0	0	42	0	0	0	0	0	0	58	0	0	0	0	0	0	0	0	0	28	0	0	0	197	0	0	0
ASV000229	0	10	0	0	0	0	0	0	0	0	0	0	0	0	0	0	0	0	0	0	0	0	0	425	9	0	0	0	0	0	0	13
ASV000230	0	0	0	0	0	0	0	0	0	0	0	0	0	0	0	0	0	0	0	0	0	0	0	0	0	454	0	0	0	0	0	0
ASV000232	0	0	0	411	0	0	0	0	0	0	0	0	0	0	0	0	0	0	0	0	0	3	15	0	0	0	0	0	0	0	0	0
ASV000233	0	0	425	0	0	0	0	0	0	0	0	0	0	0	0	0	0	0	0	0	0	0	0	0	0	0	0	0	0	0	0	0
ASV000234	0	0	0	0	0	0	382	0	0	0	0	0	0	0	0	0	0	0	0	0	0	0	0	0	0	0	0	42	0	0	0	0
ASV000235	0	0	0	0	0	0	0	0	0	4	0	0	0	0	0	0	0	0	0	6	0	0	0	0	0	0	403	0	0	0	0	0
ASV000236	0	0	0	404	0	0	0	0	0	0	0	0	0	0	0	0	0	0	0	0	0	0	0	0	0	0	0	0	0	0	0	0
ASV000237	0	0	0	0	0	0	0	0	0	0	0	0	0	0	0	0	0	0	0	0	399	0	0	0	0	0	0	0	0	0	0	0
ASV000238	0	0	0	0	0	0	0	0	0	0	0	0	0	0	0	0	0	0	0	0	0	398	0	0	0	0	0	0	0	0	0	0
ASV000239	0	0	0	0	0	0	0	0	0	0	0	0	0	0	0	0	0	0	132	0	0	0	0	0	0	0	0	0	0	0	0	248
ASV000240	0	0	0	0	0	0	375	0	0	0	0	0	0	0	0	0	0	0	0	0	0	0	0	0	0	0	0	0	0	0	0	0
ASV000241	0	0	0	0	0	0	0	0	0	0	359	0	0	0	0	0	0	0	0	0	0	0	0	0	0	0	0	0	0	0	0	0
ASV000242	0	0	0	0	0	0	0	0	0	0	0	0	0	0	0	0	0	0	0	0	0	0	0	0	330	0	0	0	0	28	0	0
ASV000243	0	0	0	0	0	0	0	0	0	0	0	0	0	0	0	0	0	0	34	0	0	0	0	0	0	0	0	0	0	0	0	313
ASV000244	0	0	0	0	0	0	0	0	0	0	0	0	0	0	0	0	0	0	0	0	0	0	0	343	0	0	0	0	0	0	0	0
ASV000245	0	0	0	0	0	0	0	0	0	0	0	0	0	0	0	0	0	0	0	338	0	0	0	0	0	0	0	0	0	0	0	0
ASV000246	0	4	0	0	0	0	0	0	0	0	0	0	0	0	0	0	0	0	107	0	0	7	0	0	0	0	0	0	0	0	0	214
ASV000247	0	0	24	38	0	0	0	0	0	0	0	0	0	0	0	0	0	0	0	0	0	0	0	0	0	0	209	0	0	0	0	0
ASV000248	0	22	0	0	0	0	0	30	0	0	38	0	0	0	0	0	17	0	15	0	0	0	0	0	0	0	0	0	0	0	25	0
ASV000249	0	0	0	0	0	0	0	0	0	33	29	0	0	0	17	0	0	0	48	0	0	0	0	0	0	0	0	0	0	0	13	0
ASV000250	0	0	0	0	0	0	0	0	0	0	0	0	0	0	0	60	0	0	0	0	0	0	0	0	0	0	0	0	0	0	0	0
ASV000251	19	0	0	0	0	17	0	0	0	0	0	0	0	0	0	0	0	19	0	0	0	0	0	0	16	0	0	0	10	0	0	0
ASV000252	0	0	0	0	0	0	0	0	0	0	0	0	0	0	0	0	0	0	0	0	0	0	0	0	0	0	0	0	0	0	0	0
ASV000253	0	0	0	0	0	0	0	0	0	0	0	0	0	0	0	0	0	0	0	0	0	0	0	0	0	0	0	0	0	0	0	0
ASV000254	0	0	0	0	0	0	0	0	0	0	0	0	0	0	0	0	0	0	0	0	0	0	0	0	0	0	0	0	0	0	0	0
ASV000255	0	0	0	0	0	0	0	0	0	0	0	0	0	0	0	0	0	0	0	0	0	0	0	0	0	0	0	0	0	0	0	0
ASV000256	0	0	0	0	0	0	0	0	0	0	0	0	0	0	0	0	0	0	0	0	0	0	0	0	0	0	0	0	0	0	0	0
ASV000257	0	0	0	0	0	0	0	0	0	0	0	0	0	0	0	0	0	0	0	0	0	0	0	0	0	0	0	0	0	0	0	0
ASV000258	0	0	0	0	0	0	0	0	0	0	0	0	0	0	0	0	0	0	0	0	0	0	0	0	0	0	0	0	0	0	0	0
ASV000259	0	0	0	0	0	0	0	0	0	0	0	0	0	0	0	0	0	0	0	0	0	0	0	0	0	0	0	0	0	0	0	0
ASV000260	0	0	0	0	0	0	0	0	0	0	0	0	0	0	0	0	0	0	0	0	0	0	0	0	0	0	0	0	0	0	0	0
ASV000261	0	0	0	0	0	0	0	0	0	0	0	0	0	0	0	0	0	0	0	0	0	0	0	0	0	0	0	0	0	0	0	0
ASV000262	0	0	0	0	0	0	0	0	0	0	0	0	0	0	0	0	0	0	0	0	0	0	0	0	0	0	0	0	0	0	0	0

[truncated: 13 more sheets: Taxonomy (ChronicEarly), Taxa Abundance (ChronicEarly), Alpha diversity (ChronicEarly), Beta diversity (ChronicEarly), STAMP-Metadata (MWvsHC), STAMP-Pathway_profile (MWvsHC), STAMP Active Features (MWvsHC), STAMP GABA-Glutamate (MWvsHC), MaAsLin2 Metadata (MWvsHC), MaAsLin2 Feature data (MWvsHC), MaAsLin2 All Results (MWvsHC), MaAsLin2 Significant (MWvsHC), WGS W. confusa Report]
